# Supplementary material for: Theoretical study on the surface stabilities, electronic structures and water adsorption behavior of the Ta3N5(110) surface
Source: Royal Society of Chemistry journal article supplement (doi:10.1039/c5cp07958f), 2016-01-01
Supplement: c5cp07958f1.pdf [file c5cp07958f1.pdf]

**Electronic Supporting Information (ESI)**

For

**Theoretical study on the surface stabilities, electronic structures and water  
adsorption behavior of the Ta<sub>3</sub>N<sub>5</sub> (110) surface**

Submitted to *Physical Chemistry Chemical Physics*

by

Jiajia Wang,<sup>ab</sup> Aibin Ma,<sup>\*ac</sup> Zhaosheng Li,<sup>\*b</sup> Jinghua Jiang,<sup>ac</sup> Jianyong Feng<sup>b</sup> and Zhigang  
Zou<sup>b</sup>

<sup>a</sup> *College of Mechanics and Materials, Hohai University, Nanjing 210098, P. R. of  
China.*

<sup>b</sup> *National Laboratory of Solid State Microstructures, Department of Physics,  
Ecomaterials and Renewable Energy Research Center (ERERC), and College of  
Engineering and Applied Sciences, Nanjing University, Nanjing 210093, P. R. of China.*

<sup>c</sup> *Jiangsu collaborative innovation center of advanced micro/nano materials &  
equipment, Nanjing 210094, P. R. of China.*

\* Corresponding Authors: Tel: +86-25-83787239, Fax: +86-25-83786046. E-mail:[aibin-  
ma@hhu.edu.cn](mailto:aibin-ma@hhu.edu.cn)(A.B. MA) or [zsli@nju.edu.cn](mailto:zsli@nju.edu.cn)(Z. S. Li)

### SI-1 Details of the Ta<sub>3</sub>N<sub>5</sub> (110) and (100) surface models

As can be seen in the **Fig. S1**, it is very difficult to clarify all terminations of the Ta<sub>3</sub>N<sub>5</sub> (110) surface. Then, based on the repeated atomic layer (the atoms inside the two black lines), we select ten possible terminations to calculate their surface energies. The detailed atomic structures of these ten terminations are shown in **Fig. S2a to j**. It is seen that, the termination in Fig. S2a is equal to the first black line in Fig. S1. From Fig. S2a to j, the surface atoms with the same vertical coordinates (in the same plane) are gradually removed.

Before calculating the surface energies of these ten terminations, we must test how many atomic layers are sufficient to simulate the Ta<sub>3</sub>N<sub>5</sub> (110) surface. Using the termination in Fig. S2a as a probe, the slab models with 5, 7, 9 and 11 atomic layers are constructed. Surface energies calculations reveal that 7 atomic layers with a vacuum space of 15 Å at each side of the slab model are sufficient to simulate the Ta<sub>3</sub>N<sub>5</sub> (110) surface. Then, all the other nine terminations are constructed based on the slab model that contains 7 atomic layers with a vacuum space of 15 Å at each side of the slab model.

The surface energies of these ten terminations are listed in **Table S1**. It is seen that, the surface energy of the termination in Fig. S2a is the smallest, suggesting that this termination is theoretically most stable. Then, the termination in Fig. S2a is adopted to construct all Ta<sub>3</sub>N<sub>5</sub> (110) surfaces in this study. **Fig. S3a** shows the slab model of the Ta<sub>3</sub>N<sub>5</sub> (110) surface used in this study.

When we investigate the water adsorption on the Ta<sub>3</sub>N<sub>5</sub> (110) surface, we do not use the slab model in Fig. S3a but that in **Fig. S3b**. It is seen that, the slab model in Fig. S3b also contains 7 atomic layers but with a vacuum space of 20 Å *only* at one side of the slab model. Furthermore, to keep the nearly same neighboring image interactions along different directions<sup>1</sup>, the 1×2 slab model of the Ta<sub>3</sub>N<sub>5</sub> (110) surface is adopted for the water adsorption calculations. The surface size of the 1×1 Ta<sub>3</sub>N<sub>5</sub> (110) surface is 10.35(*u*)×5.52(*v*) Å<sup>2</sup>. Thus, the neighboring water interaction along the *u* direction is largely different from that along the *v* direction. Using the 1×2 slab model, whose surface size becomes 10.35(*u*)×11.04(*v*) Å<sup>2</sup>, the neighboring water interaction along the *u* direction is nearly the same as that along the *v* direction. When we perform the water adsorption calculation, the water molecule is put onto one side of the slab and the two bottom atomic layers are fixed.

Using the slab model in Fig. S3b is able to reduce the computational costs of water adsorption calculations.

In this study, the surface energies and water adsorption energies associated with the  $\text{Ta}_3\text{N}_5$  (100) surface are all cited from our previous work.<sup>2,3</sup> Except the surface energies and water adsorption energies, some important properties of the (100) surface, for example the water splitting energy barriers, are calculated in this study. The slab models of the  $\text{Ta}_3\text{N}_5$  (100) surface for surface calculation and water adsorption calculation are shown in **Fig. S3c and d**, which are cited from Ref. 2 and 3, respectively. It is seen that, similar with the  $\text{Ta}_3\text{N}_5$  (110) surface model, the (100) surface model also contains 7 atomic layers.

The CONTCARs of clean and oxygen contained (110) and (100) surfaces, and the molecular and dissociative water adsorption on the (110) and (100) surfaces are listed at the end of this supporting information.

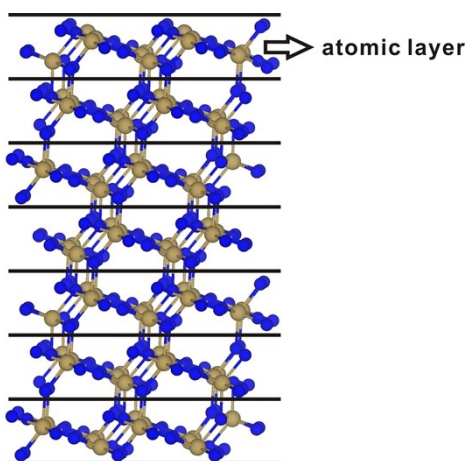

**Fig. S1** Atomic structure of the  $\text{Ta}_3\text{N}_5$  (110) surface.

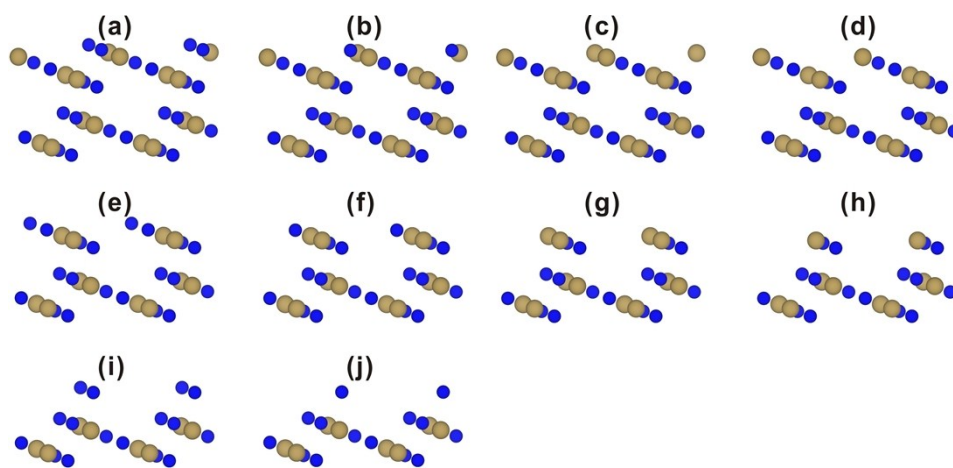

**Fig. S2** The selected ten terminations of the  $\text{Ta}_3\text{N}_5$  (110) surface.

**Table S1** Surface energies of ten terminations of the Ta<sub>3</sub>N<sub>5</sub> (110) surface shown in Fig. S2.

| Surface terminations | $E_{\text{surf}}$ (J/m <sup>2</sup> ) | Surface terminations | $E_{\text{surf}}$ (J/m <sup>2</sup> ) |
|----------------------|---------------------------------------|----------------------|---------------------------------------|
| <b>(a)</b>           | <b><u>1.04</u></b>                    | (f)                  | 2.01                                  |
| (b)                  | 2.49                                  | (g)                  | 3.21                                  |
| (c)                  | 3.53                                  | (h)                  | 2.71                                  |
| (d)                  | 2.93                                  | (i)                  | 2.68                                  |
| (e)                  | 3.21                                  | (j)                  | 1.73                                  |

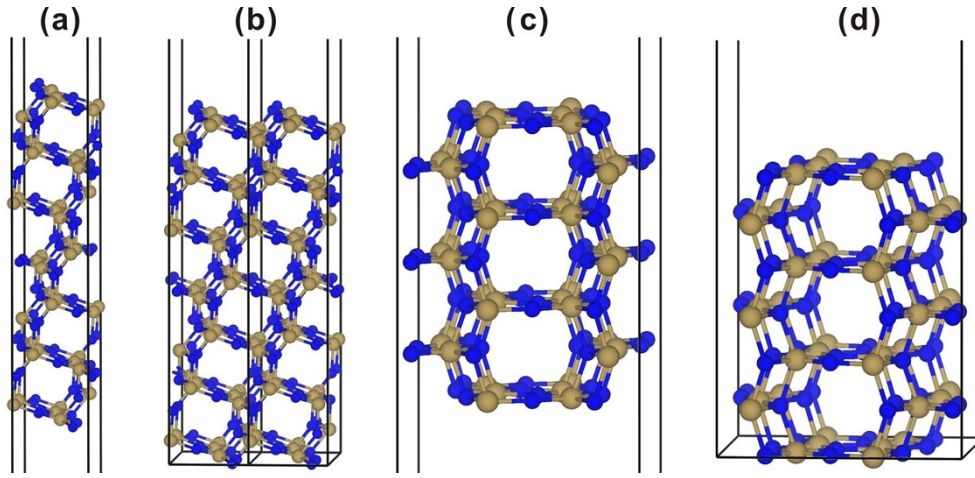

**Fig. S3** The slab models of the Ta<sub>3</sub>N<sub>5</sub> (110) surface for (a) surface calculation and (b) water adsorption calculation. The slab models of the Ta<sub>3</sub>N<sub>5</sub> (100) surface for (c) surface calculation and (d) water adsorption calculation.

### SI-2 Chemical potential calculation details

Under the thermal equilibrium growth conditions, the bulk Ta<sub>3</sub>N<sub>5</sub> should satisfy:

$$3\Delta\mu_{\text{Ta}} + 5\Delta\mu_{\text{N}} = E_{\text{Ta}_3\text{N}_5}^f = -8.47\text{eV} \quad (\text{S1})$$

where  $E_{\text{Ta}_3\text{N}_5}^f$  is the formation energy of bulk Ta<sub>3</sub>N<sub>5</sub>. Then, we can get  $\Delta\mu_{\text{N}}$  and  $\Delta\mu_{\text{Ta}}$  under different growth conditions: under the N-poor (Ta-rich) growth condition,  $\Delta\mu_{\text{N}} = -1.69$  and  $\Delta\mu_{\text{Ta}} = 0$  eV; under the N-rich (Ta-poor) growth condition,  $\Delta\mu_{\text{N}} = 0$  and  $\Delta\mu_{\text{Ta}} = -2.82$  eV. To calculate the  $\Delta\mu_{\text{O}}$ , precipitation of secondary phases such as TaON and Ta<sub>2</sub>O<sub>5</sub> should be avoided:

$$\Delta\mu_N + \Delta\mu_O + \Delta\mu_{Ta} < E_{TaON}^f = -5.79eV \quad (S2)$$

$$5\Delta\mu_O + 2\Delta\mu_{Ta} < E_{Ta_2O_5}^f = -20.20eV \quad (S3)$$

where  $E_{Ta_2O_5}^f$  and  $E_{TaON}^f$  are formation energies of  $Ta_2O_5$  and TaON, respectively. Then,  $\Delta\mu_O$  can be calculated from the lower bound for each growth condition: -4.10 and -2.97 eV under N-poor and N-rich growth conditions, respectively. More discussion of the chemical potential calculations of  $Ta_3N_5$  can be found in Ref. 2.

### SI-3 The HSE calculation

In this study, the HSE calculations are performed to verify the GGA results. Due to the large cell size of surface slab model, the HSE calculations of the  $Ta_3N_5$  (110) surface need large amount of computational resources, especially when many  $k$ -points are used for HSE calculations. Then, to reduce the computational costs, the  $\Gamma$ -centered  $k$ -point meshes of  $1 \times 2 \times 1$ , which contains the (0, 0, 0) and (0, 0.5, 0)  $k$ -points, are adopted for the HSE calculations. The accuracy of the HSE method is mainly determined by two important parameters  $\alpha$  and  $\omega$ , where  $\alpha$  represents the fraction of the semilocal PBE exchange interaction replaced by a screened nonlocal functional, and  $\omega$  is the inverse screening length. The parameters  $\alpha$  and  $\omega$  are set as 25% and  $0.2 \text{ \AA}^{-1}$ , respectively, which refers to the HSE06<sup>4</sup> functional. The band gap of the pure bulk  $Ta_3N_5$  calculated by the HSE06 functional is 2.2 eV, which is very close to the experimental results (about 2.1 eV), suggesting that the HSE method is very accurate. In the HSE06 calculations, the NKRED<sup>5</sup> flag was not used in this study. The future research will include a broader spectrum of HSE06 calculations on a limited K-point grid using the NKRED flag.

**Fig. S4a and b** show the DOS of (110) and (100)+ $O_{N3}$ , respectively, calculated by the PBE functional. The DOS results of (110) and (100)+ $O_{N3}$  calculated by the HSE functional are shown in **Fig. S4c and d**, respectively. Due to the insufficient  $k$ -points, the DOS curves calculated by the HSE method are discontinuous. For example, the energy regions near the CBM in **Fig. S4c and d** should have DOS curves. However, the discontinuous DOS curves of the HSE results do not affect any qualitative analysis. The comparisons between HSE

and PBE results reveal that: (i) the charge densities of the VBM in the (110) surface calculated by PBE (**Fig. S4e**) and HSE (**Fig. S4h**) are both localized on the top atomic layers; (ii) the charge densities of the VBM in the (100)+O<sub>N3</sub> surface calculated by PBE (**Fig. S4f**) and HSE (**Fig. S4i**) are both uniformly distributed on N atoms; (iii) the charge densities of the CBM in the (100)+O<sub>N3</sub> surface calculated by PBE (**Fig. S4g**) and HSE (**Fig. S4j**) are both uniformly distributed on Ta atoms.

Therefore, the comparisons between the PBE and HSE results reveal that, although the PBE functional has its limitations, our calculated electronic structures by the PBE functional are theoretically reliable. The HSE calculation results of the Ta<sub>3</sub>N<sub>5</sub> (100) surface have been given in our previous theoretical work.<sup>2</sup>

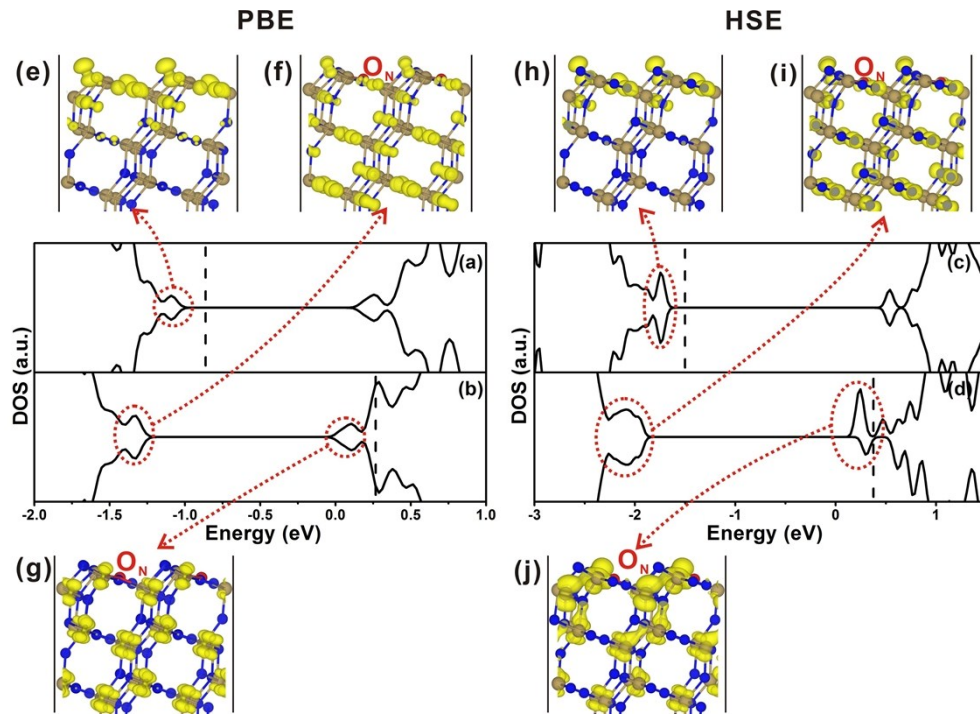

**Fig. S4** Calculated DOS of the Ta<sub>3</sub>N<sub>5</sub> (a) (110) and (b) (110)+O<sub>N3</sub> surfaces at the PBE level. Calculated DOS of the Ta<sub>3</sub>N<sub>5</sub> (c) (110) and (d) (110)+O<sub>N3</sub> at the HSE level. The vertical dashed line in each case is the Fermi level. For the PBE and HSE results, the horizontal axes of (110)+O<sub>N3</sub> are aligned with that of the clean (110) by the electrostatic potential calculations. The partial charge densities of some labeled states (e to j) are also shown. (For PBE: isosurface level = 0.0005 electron/Å<sup>3</sup>; For HSE: isosurface level = 0.001 electron/Å<sup>3</sup>)

#### SI-4 Initial adsorption sites and configurations of water molecule

**Fig. S5** shows the four possible initial adsorption configurations of water adsorption on the  $\text{Ta}_3\text{N}_5$  (110) surface. In **Fig. S5a**, one H is put on the top of one N (or O) atom. In **Fig. S5b**, the O atom of water is put on the top of the Ta atom. Considering that water is usually decomposed to one OH and one H, the water molecule interacting with the surface *via* both the O and H atoms is considered as shown in **Fig. S5c**. Since water molecule is reported to molecularly adsorbed onto  $\text{TiO}_2$  surface with its O atom bonding to the Ti atom and two H atoms bonding to the two surface O atoms,<sup>6,7</sup> the fourth initial adsorption model shown in **Fig. S5d** is constructed with the O atom bonding with the Ta atom and two H atoms bonding with two surface anion atoms. These four initial adsorption configurations of water adsorption on the  $\text{Ta}_3\text{N}_5$  (110) surface are the same as that on the (100) surface in our previous theoretical work.<sup>3</sup> Furthermore, on the (110)+ $\text{O}_{\text{N}_3}$  surface, the Ta site that is far away from the  $\text{O}_{\text{N}_3}$  atom are also considered and the calculation results are discussed in the following SI-5.

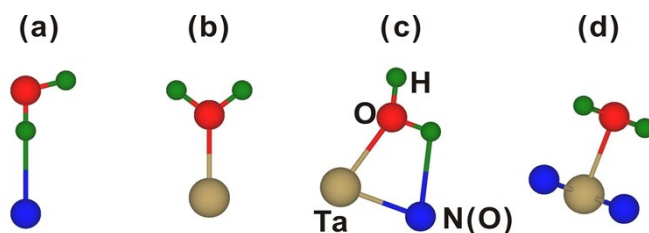

**Fig. S5** Initial adsorption configurations of water adsorption on the  $\text{Ta}_3\text{N}_5$  (110) surface

#### SI-5 Atomic structures of water adsorption and dissociation on the $\text{Ta}_3\text{N}_5$ (100) and (110) surfaces

**Fig. S6a to d** show the four models of water adsorption and dissociation on the  $\text{Ta}_3\text{N}_5$  (100) surfaces, which are all cited from our previous theoretical work.<sup>3</sup> What should be mentioned is that, the  $[100]_{\text{mol}}$ ,  $[100]_{\text{dis}}$  and  $[100+\text{O}_{\text{N}_3}]_{\text{dis}}$  models are cited from the main text of our previous theoretical work, while the  $[100+\text{O}_{\text{N}_3}]_{\text{mol}}$  model is cited from the supporting information of our previous work. It is seen that, in the  $[100]_{\text{mol}}$  model, the water is molecularly adsorbed with the  $\text{O}_w$  atom bonding with surface Ta atom. In the  $[100]_{\text{dis}}$  model, the water is decomposed into one OH and one H, which bonds with surface Ta and N atoms, respectively. In the  $[100+\text{O}_{\text{N}_3}]_{\text{mol}}$  and  $[100+\text{O}_{\text{N}_3}]_{\text{dis}}$  models, the adsorption sites and



configurations of the adsorbed water on the (100)+O<sub>N3</sub> surfaces are nearly the same as that on the clean (100) surfaces. The adsorption sites and configurations of water adsorption on the (100) and (100)+O<sub>N3</sub> surfaces are close to that on the (110) and (110)+O<sub>N3</sub> surfaces.

**Table S2** lists the structural parameters of water on the different Ta<sub>3</sub>N<sub>5</sub> (110) and (100) surfaces. It is seen that, regardless of the clean or deficient surfaces, the structural parameters of water on the Ta<sub>3</sub>N<sub>5</sub> (110) surfaces are close to that on the (100) surfaces. Beside the structural parameters of water, the number of electrons that the water molecule accepts from the (110) and (100) surfaces are also listed in Table S2. The number of electrons that the water molecule accepts from the (110) and (100) surfaces are calculated by the Bader<sup>8</sup> population analysis. Note that, for clarity purpose, our calculated Bader charge is the sum of Bader charge of three atoms of one water molecule. Therefore, the Bader charge in Table S2 reflects the electron gain and loss for one whole water molecule. The positive and negative values of Bader charge mean acceptance and donation of electrons of the water, respectively. It is seen that, the water molecule on the (110) surface accepts almost the same number of electrons as that on the (100) surface.

What should be mentioned is that, on the (110)+O<sub>N3</sub> surface, the Ta site that is far away from the O<sub>N3</sub> atom are also considered and carefully tested. The results showed that, on the Ta site that was far away from the O<sub>N3</sub> atom, the most stable molecular and dissociative water adsorption energies were 0.60 and 1.46 eV, respectively, which were smaller than that near the O<sub>N3</sub> atom (0.69 and 1.49, respectively).

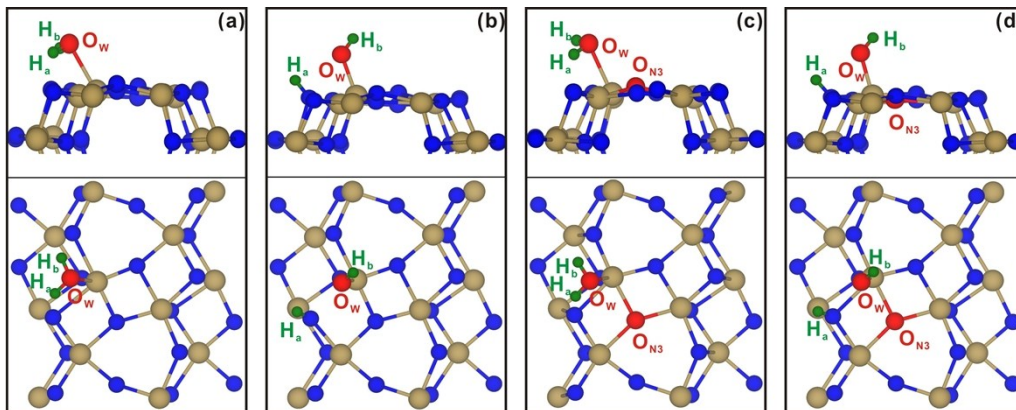

**Fig. S6** The optimized structures of water adsorption models: (a) [100]<sub>mol</sub>, (b) [100]<sub>dis</sub>, (c) [100+O<sub>N3</sub>]<sub>mol</sub> and (d) [100+O<sub>N3</sub>]<sub>dis</sub> (upper: side-view; lower: top-view). Here, the ‘mol’ and ‘dis’ refer to the molecular and dissociative adsorptions, respectively.



**Table S2** Structural parameters of water [ $d(\text{H}_a\text{-O}_w)$  and  $d(\text{H}_b\text{-O}_w)$  in Å;  $\angle\text{H}_a\text{-O}_w\text{-H}_b$  in degree( $^\circ$ )] and Bader charge of water (in eV) for water adsorption on the different  $\text{Ta}_3\text{N}_5$  (110) and (100) surfaces.

| Surfaces | Structural parameters of water <sup>a</sup>       |                            |                                          | Bader charge |       |
|----------|---------------------------------------------------|----------------------------|------------------------------------------|--------------|-------|
|          | $d(\text{H}_a\text{-O}_w)$                        | $d(\text{H}_b\text{-O}_w)$ | $\angle\text{H}_a\text{-O}_w\text{-H}_b$ |              |       |
| (110)    | $[\text{110}]_{\text{mol}}$                       | 0.99                       | 0.99                                     | 105.98       | -0.04 |
|          | $[\text{110}]_{\text{dis}}$                       | 2.59                       | 0.97                                     | 138.87       | 0.13  |
|          | $[\text{110}+\text{O}_{\text{N}_3}]_{\text{mol}}$ | 1.00                       | 0.98                                     | 106.89       | -0.02 |
|          | $[\text{110}+\text{O}_{\text{N}_3}]_{\text{dis}}$ | 2.71                       | 0.97                                     | 125.82       | 0.14  |
| (100)    | $[\text{100}]_{\text{mol}}$                       | 0.99                       | 1.02                                     | 106.44       | -0.03 |
|          | $[\text{100}]_{\text{dis}}$                       | 2.60                       | 0.97                                     | 158.25       | 0.13  |
|          | $[\text{100}+\text{O}_{\text{N}_3}]_{\text{mol}}$ | 1.00                       | 0.98                                     | 107.37       | -0.03 |
|          | $[\text{100}+\text{O}_{\text{N}_3}]_{\text{dis}}$ | 2.58                       | 0.97                                     | 162.44       | 0.13  |

<sup>a</sup>For free water:  $d(\text{H}_a\text{-O}_w) = d(\text{H}_b\text{-O}_w) = 0.97$  Å,  $\angle\text{H}_a\text{-O}_w\text{-H}_b = 104.5^\circ$ .

### SI-6 Atomic structures and frequencies of transition states

The atomic structures of the four transition states  $[\text{110}]_{\text{TS}}$ ,  $[\text{110}+\text{O}_{\text{N}_3}]_{\text{TS}}$ ,  $[\text{100}]_{\text{TS}}$  and  $[\text{100}+\text{O}_{\text{N}_3}]_{\text{TS}}$  are shown in the following **Fig. S7**. The detailed structural parameters of these four transition states are listed in **Table S3**.

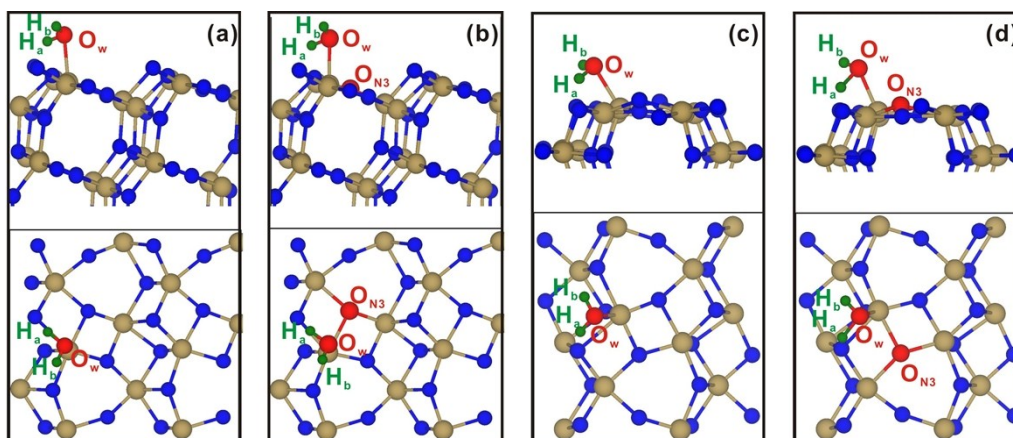

**Fig. S7** The atomic structures of four transition states: (a)  $[\text{110}]_{\text{TS}}$ , (b)  $[\text{110}+\text{O}_{\text{N}_3}]_{\text{TS}}$ , (c)  $[\text{100}]_{\text{TS}}$  and (d)  $[\text{100}+\text{O}_{\text{N}_3}]_{\text{TS}}$  (upper: side-view; lower: top-view). Here, the ‘TS’ refers to the transition state.

**Table S3** Structural parameters of water [ $d(\text{H}_a\text{-O}_w)$  and  $d(\text{H}_b\text{-O}_w)$  in Å;  $\angle\text{H}_a\text{-O}_w\text{-H}_b$  in degree( $^\circ$ )] for transition states shown in Fig. S7.

| Transition states                         | Structural parameters of water <sup>a</sup> |                            |                                          |
|-------------------------------------------|---------------------------------------------|----------------------------|------------------------------------------|
|                                           | $d(\text{H}_a\text{-O}_w)$                  | $d(\text{H}_b\text{-O}_w)$ | $\angle\text{H}_a\text{-O}_w\text{-H}_b$ |
| $[110]_{\text{TS}}$                       | 1.09                                        | 0.98                       | 109.22                                   |
| $[110+\text{O}_{\text{N}_3}]_{\text{TS}}$ | 1.12                                        | 0.97                       | 112.65                                   |
| $[100]_{\text{TS}}$                       | 1.09                                        | 0.98                       | 108.51                                   |
| $[100+\text{O}_{\text{N}_3}]_{\text{TS}}$ | 1.50                                        | 0.97                       | 105.05                                   |

<sup>a</sup>For free water:  $d(\text{H}_a\text{-O}_w) = d(\text{H}_b\text{-O}_w) = 0.97$  Å,  $\angle\text{H}_a\text{-O}_w\text{-H}_b = 104.5^\circ$ .

The frequency calculations should be performed to confirm whether a good transition state is found. Frequencies of four transition states  $[100]_{\text{TS}}$ ,  $[100+\text{O}_{\text{N}_3}]_{\text{TS}}$ ,  $[110]_{\text{TS}}$  and  $[110+\text{O}_{\text{N}_3}]_{\text{TS}}$  are calculated. For the frequency calculations, most of the surface is frozen, but the atoms that undergo major changes during the transition state are relaxed. Using the  $[110]_{\text{TS}}$  as example, the bottom six atomic layers are fixed, while the one top atomic layer (32 atoms) and the adsorbed water (3 atoms) are relaxed. Then, for the transition state  $[110]_{\text{TS}}$ , the total number of calculated frequencies is 105 ( $105=35\times 3$ ). The 105 frequencies of the transition state  $[110]_{\text{TS}}$  are listed below (partly):

|           |                |                   |                  |                |
|-----------|----------------|-------------------|------------------|----------------|
| 1 f =     | 111.365466 THz | 699.729857 2PiTHz | 3714.751965 cm-1 | 460.570710 meV |
| 2 f =     | 57.864160 THz  | 363.571238 2PiTHz | 1930.140547 cm-1 | 239.307014 meV |
| 3 f =     | 43.376931 THz  | 272.545293 2PiTHz | 1446.898616 cm-1 | 179.392629 meV |
| ...       |                |                   |                  |                |
| 103 f =   | 1.835970 THz   | 11.535743 2PiTHz  | 61.241381 cm-1   | 7.592966 meV   |
| 104 f =   | 1.645280 THz   | 10.337596 2PiTHz  | 54.880616 cm-1   | 6.804332 meV   |
| 105 f/i = | 8.166483 THz   | 51.311526 2PiTHz  | 272.404545 cm-1  | 33.773871 meV  |

The transition state is defined as having one and only one negative (imaginary) vibration frequency. The above results yield one and only one negative frequency (No. 105: the 'f/i' means imaginary frequency), confirming that the transition state  $[110]_{\text{TS}}$  is a good transition state. Other three transition states also have one and only one negative frequency, proving that they are all good transition states:

The frequencies of the transition state  $[110+\text{O}_{\text{N}_3}]_{\text{TS}}$  (partly):

|       |                |                   |                  |                |
|-------|----------------|-------------------|------------------|----------------|
| 1 f = | 112.251643 THz | 705.297871 2PiTHz | 3744.311645 cm-1 | 464.235644 meV |
| 2 f = | 53.115897 THz  | 333.737021 2PiTHz | 1771.755542 cm-1 | 219.669770 meV |
| 3 f = | 39.693480 THz  | 249.401490 2PiTHz | 1324.031930 cm-1 | 164.159096 meV |

|           |               |                   |                 |                |
|-----------|---------------|-------------------|-----------------|----------------|
| ...       | ...           | ...               | ...             | ...            |
| 103 f =   | 1.797953 THz  | 11.296870 2PiTHz  | 59.973247 cm-1  | 7.435738 meV   |
| 104 f =   | 1.662779 THz  | 10.447550 2PiTHz  | 55.464344 cm-1  | 6.876705 meV   |
| 105 f/i = | 19.984737 THz | 125.567803 2PiTHz | 666.619037 cm-1 | 82.650257 meVs |

The frequencies of the transition state [100]<sub>TS</sub> (partly):

|          |                |                   |                  |                |
|----------|----------------|-------------------|------------------|----------------|
| 1 f =    | 108.634541 THz | 682.570955 2PiTHz | 3623.658142 cm-1 | 449.276511 meV |
| 2 f =    | 57.656072 THz  | 362.263785 2PiTHz | 1923.199494 cm-1 | 238.446433 meV |
| 3 f =    | 44.039597 THz  | 276.708948 2PiTHz | 1469.002786 cm-1 | 182.133198 meV |
| ...      | ...            | ...               | ...              | ...            |
| 55 f =   | 2.578326 THz   | 16.200098 2PiTHz  | 86.003685 cm-1   | 10.663102 meV  |
| 56 f =   | 1.356385 THz   | 8.522417 2PiTHz   | 45.244126 cm-1   | 5.609559 meV   |
| 57 f/i = | 7.960605 THz   | 50.017956 2PiTHz  | 265.537191 cm-1  | 32.922428 meV  |

The frequencies of the transition state [100+O<sub>N3</sub>]<sub>TS</sub> (partly):

|          |                |                   |                  |                |
|----------|----------------|-------------------|------------------|----------------|
| 1 f =    | 112.355378 THz | 705.949658 2PiTHz | 3747.771874 cm-1 | 464.664658 meV |
| 2 f =    | 56.814041 THz  | 356.973150 2PiTHz | 1895.112375 cm-1 | 234.964073 meV |
| 3 f =    | 34.739174 THz  | 218.272669 2PiTHz | 1158.774088 cm-1 | 143.669728 meV |
| ...      | ...            | ...               | ...              | ...            |
| 55 f =   | 2.789564 THz   | 17.527345 2PiTHz  | 93.049822 cm-1   | 11.536712 meV  |
| 56 f =   | 2.660221 THz   | 16.714662 2PiTHz  | 88.735420 cm-1   | 11.001794 meV  |
| 57 f/i = | 3.026927 THz   | 19.018745 2PiTHz  | 100.967425 cm-1  | 12.518370 meV  |

### SI-7 Electron localization function (ELF)

The ELF is a measure of the spatial distribution of an electron. The value of ELF varies in the range of 0 to 1, corresponding to the delocalized and localized limit of electron gas.<sup>9</sup> In the water splitting reaction, the water molecule usually accepts electrons from surface to break the H-O bond. Therefore, the surface with smaller ELF, *i.e.*, more delocalized electron distribution, is expected to have strong water splitting ability, because the electrons are relatively easier transferred from surface to the adsorbed water molecule. **Fig. S8a and b** are the ELF of selected planes on the (110) and (100) surfaces, respectively. For the comparison purpose, the energy scales in Fig. S8a and b are both set from 0 to 0.75. It is seen that, the ELF on the (110) surface is nearly the same as that on the (100) surface. Therefore, the surface electron localization does not account for the different water splitting ability between the (110) and (100) surfaces.

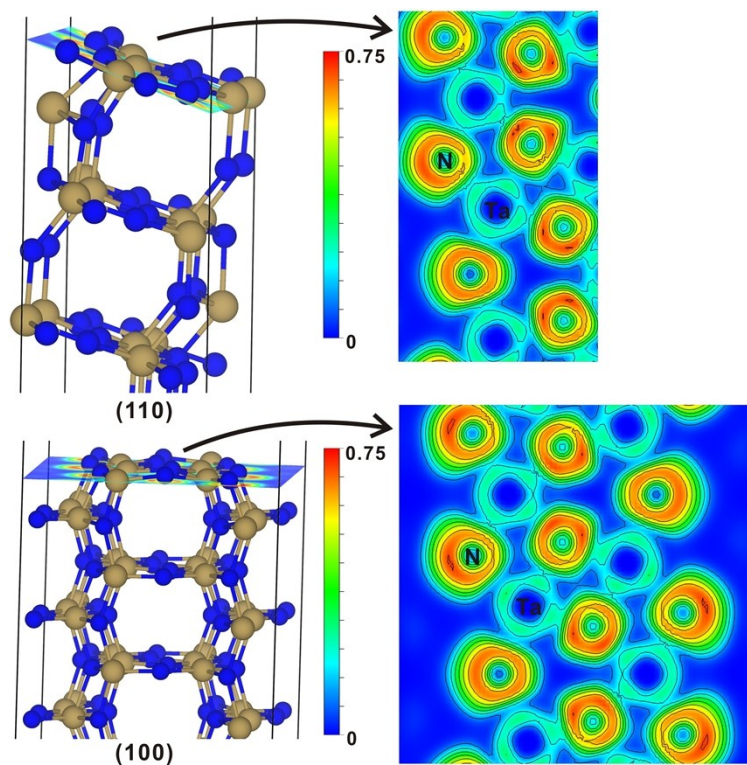

**Fig. S8** The Electron localization function (ELF) of selected planes on the (a) (110) and (b) (100) surfaces. The isosurface level are both set from 0 to 0.75.

## References

- S1. C. G. Van de Walle and J. Neugebauer, *J. Appl. Phys.*, 2004, **95**, 3851-3879.
- S2. J. J. Wang, A. B. Ma, Z. S. Li, J. H. Jiang, J. Y. Feng and Z. G. Zou, *Phys. Chem. Chem. Phys.*, 2015, **17**, 23265-23272.
- S3. J. Wang, W. Luo, J. Feng, L. Zhang, Z. Li and Z. Zou, *Phys. Chem. Chem. Phys.*, 2013, **15**, 16054-16064.
- S4. A. V. Krukau, O. A. Vydrov, A. F. Izmaylov and G. E. Scuseria, *J. Chem. Phys.*, 2006, **125**, 224106.
- S5. J. Paier, M. Marsman, K. Hummer, G. Kresse, I. C. Gerber and J. G. Ángyán, *J. Chem. Phys.*, 2006, **124**, 154709.
- S6. M. Sumita, C. P. Hu and Y. Tateyama, *J. Phys. Chem. C*, 2010, **114**, 18529-18537.
- S7. A. V. Krukau, O. A. Vydrov, A. F. Izmaylov and G. E. Scuseria, *J. Chem. Phys.*, 2006, **125**, 224106.
- S8. R. F. W. Bader, *Chem. Rev.*, 1991, **91**, 893-928.
- S9. R. F. Nalewajski, A. M. Koster and S. Escalante, *J. Phys. Chem. A*, 2005, **109**, 10038-10043.

**The CONTCARs of 12 discussed slab models are listed below:**

**(1) (100)**

```

110
  1.0000000000000000
  10.3476600646972621   0.0000000000000000   0.0000000000000000
  0.0000000000000000   5.5169796943664533   0.0000000000000010
  0.0000000000000000  -0.0000000000000020   53.7977383243068701
  N   Ta
  70  42
Direct
  0.2500000000000000   0.6276541448089830   0.2815122769983426
  0.2500000000000000   0.9159109925822899   0.3472902926825040
  0.2500000000000000   0.1841223670415129   0.6864666775927778
  0.2500000000000000   0.1617482191697644   0.4159040196444198
  0.2500000000000000   0.4111034643471708   0.4839128976215916
  0.2500000000000000   0.6606977262154421   0.5518773724936725
  0.2500000000000000   0.9046079917393763   0.6198756876901994
  0.7500000000000000   0.0889117734905291   0.3801243123098008
  0.7500000000000000   0.3328220390144629   0.4481226275063275
  0.7500000000000000   0.5824163008827347   0.5160871023784087
  0.7500000000000000   0.8317715460601409   0.5840959803555803
  0.7500000000000000   0.8093973981883923   0.3135333224072218
  0.7500000000000000   0.0776087726476152   0.6527097073174959
  0.7500000000000000   0.3658656204209225   0.7184877230016574
  0.3817475049667290   0.1508743566635772   0.2975053494763555
  0.3806989811576185   0.4173315856947873   0.3674144743310659
  0.3806845186218517   0.6649839609126291   0.4351522426554381
  0.3805856773924065   0.9144768817168261   0.5031769148917131
  0.4259903716820908   0.2066712121815923   0.4530747066788000
  0.4262060722322316   0.4566541514625107   0.5210253111125930
  0.4264447972601017   0.7070882954560329   0.5889551586366494
  0.4261380139700587   0.9542024085076957   0.6576112514944307
  0.3804509535230721   0.1639347912415557   0.5711758201809860
  0.3803949842231428   0.4099929157818114   0.6382090020533573
  0.3775323795012985   0.6779448757032901   0.7083144864752121
  0.4290216354257477   0.6873343595158518   0.3182598341871526
  0.4257893832206138   0.9607342838278662   0.3851293795518996
  0.4254439125501136   0.2401558086833923   0.7249581137584107
  0.8775323795012984   0.3155748895266156   0.2916855135247879
  0.8803949842231428   0.5835268494480939   0.3617909979466424
  0.8804509535230720   0.8295849739883496   0.4288241798190136
  0.9254439125501134   0.7533639565465059   0.2750418862415896
  0.9257893832206141   0.0327854814020323   0.6148706204481001
  0.9290216354257477   0.3061854057140462   0.6817401658128474
  0.8805856773924063   0.0790428835130790   0.4968230851082871
  0.8806845186218517   0.3285358043172761   0.5648477573445621
  0.8806989811576181   0.5761881795351176   0.6325855256689343
  0.8817475049667289   0.8426454085663283   0.7024946505236450
  0.9261380139700587   0.0393173567222026   0.3423887485055698
  0.9264447972601015   0.2864314697738649   0.4110448413633507
  0.9262060722322318   0.5368656137673873   0.4789746888874073
  0.9259903716820905   0.7868485530483059   0.5469252933212002
  0.1182524950332709   0.1508743566635772   0.2975053494763555
  0.1193010188423816   0.4173315856947873   0.3674144743310659
  0.1193154813781485   0.6649839609126291   0.4351522426554381
  0.1194143226075936   0.9144768817168261   0.5031769148917131

```

|                    |                    |                    |
|--------------------|--------------------|--------------------|
| 0.0740096283179094 | 0.2066712121815923 | 0.4530747066788000 |
| 0.0737939277677682 | 0.4566541514625107 | 0.5210253111125930 |
| 0.0735552027398983 | 0.7070882954560329 | 0.5889551586366494 |
| 0.0738619860299414 | 0.9542024085076957 | 0.6576112514944307 |
| 0.1195490464769280 | 0.1639347912415557 | 0.5711758201809860 |
| 0.1196050157768571 | 0.4099929157818114 | 0.6382090020533573 |
| 0.1224676204987015 | 0.6779448757032901 | 0.7083144864752121 |
| 0.0709783645742523 | 0.6873343595158518 | 0.3182598341871526 |
| 0.0742106167793861 | 0.9607342838278662 | 0.3851293795518996 |
| 0.0745560874498865 | 0.2401558086833923 | 0.7249581137584107 |
| 0.6224676204987016 | 0.3155748895266156 | 0.2916855135247879 |
| 0.6196050157768572 | 0.5835268494480939 | 0.3617909979466424 |
| 0.6195490464769280 | 0.8295849739883496 | 0.4288241798190136 |
| 0.5745560874498866 | 0.7533639565465059 | 0.2750418862415896 |
| 0.5742106167793859 | 0.0327854814020323 | 0.6148706204481001 |
| 0.5709783645742523 | 0.3061854057140462 | 0.6817401658128474 |
| 0.6194143226075937 | 0.0790428835130790 | 0.4968230851082871 |
| 0.6193154813781483 | 0.3285358043172761 | 0.5648477573445621 |
| 0.6193010188423819 | 0.5761881795351176 | 0.6325855256689343 |
| 0.6182524950332711 | 0.8426454085663283 | 0.7024946505236450 |
| 0.5738619860299413 | 0.0393173567222026 | 0.3423887485055698 |
| 0.5735552027398985 | 0.2864314697738649 | 0.4110448413633507 |
| 0.5737939277677682 | 0.5368656137673873 | 0.4789746888874073 |
| 0.5740096283179095 | 0.7868485530483059 | 0.5469252933212002 |
| 0.2500000000000000 | 0.1541925593534368 | 0.3771699626797223 |
| 0.2500000000000000 | 0.4010818944351590 | 0.4453876177850144 |
| 0.2500000000000000 | 0.6501297178641477 | 0.5134166762398749 |
| 0.2500000000000000 | 0.8980040632009247 | 0.5813175578351661 |
| 0.2500000000000000 | 0.9034145477789389 | 0.3082875292289713 |
| 0.2500000000000000 | 0.1463830164287659 | 0.6487389368233193 |
| 0.2500000000000000 | 0.3910871506605234 | 0.7148314429680480 |
| 0.7500000000000000 | 0.6024326145693818 | 0.2851685570319522 |
| 0.7500000000000000 | 0.8471367488011393 | 0.3512610631766810 |
| 0.7500000000000000 | 0.0901052174509663 | 0.6917124707710288 |
| 0.7500000000000000 | 0.0955157020289805 | 0.4186824421648341 |
| 0.7500000000000000 | 0.3433900473657509 | 0.4865833237601251 |
| 0.7500000000000000 | 0.5924378707947464 | 0.5546123822149854 |
| 0.7500000000000000 | 0.8393272058764683 | 0.6228300373202779 |
| 0.9417262510473676 | 0.0132463523473586 | 0.3031522182425552 |
| 0.9405102290999313 | 0.2642342712081990 | 0.3727681363652685 |
| 0.9406040438856590 | 0.5141565946860199 | 0.4409809708149499 |
| 0.9405547761572585 | 0.7631715781896991 | 0.5090041291547166 |
| 0.9405837369527749 | 0.0113181031772254 | 0.5768577152548332 |
| 0.9419401228492265 | 0.2591391196892418 | 0.6441774960302574 |
| 0.9387458718711920 | 0.4880206218527503 | 0.7112353020310229 |
| 0.4387458718711920 | 0.5054991433771550 | 0.2887646979689769 |
| 0.4419401228492263 | 0.7343806455406635 | 0.3558225039697425 |
| 0.4405837369527751 | 0.9822016620526798 | 0.4231422847451665 |
| 0.4405547761572589 | 0.2303481870402063 | 0.4909958708452835 |
| 0.4406040438856588 | 0.4793631705438853 | 0.5590190291850498 |
| 0.4405102290999312 | 0.7292854940217063 | 0.6272318636347315 |
| 0.4417262510473676 | 0.9802734128825464 | 0.6968477817574451 |
| 0.5582737489526324 | 0.0132463523473586 | 0.3031522182425552 |
| 0.5594897709000687 | 0.2642342712081990 | 0.3727681363652685 |
| 0.5593959561143410 | 0.5141565946860199 | 0.4409809708149499 |
| 0.5594452238427415 | 0.7631715781896991 | 0.5090041291547166 |
| 0.5594162630472251 | 0.0113181031772254 | 0.5768577152548332 |
| 0.5580598771507735 | 0.2591391196892418 | 0.6441774960302574 |

|                    |                    |                    |
|--------------------|--------------------|--------------------|
| 0.5612541281288080 | 0.4880206218527503 | 0.7112353020310229 |
| 0.0612541281288080 | 0.5054991433771550 | 0.2887646979689769 |
| 0.0580598771507737 | 0.7343806455406635 | 0.3558225039697425 |
| 0.0594162630472250 | 0.9822016620526798 | 0.4231422847451665 |
| 0.0594452238427413 | 0.2303481870402063 | 0.4909958708452835 |
| 0.0593959561143412 | 0.4793631705438853 | 0.5590190291850498 |
| 0.0594897709000688 | 0.7292854940217063 | 0.6272318636347315 |
| 0.0582737489526323 | 0.9802734128825464 | 0.6968477817574451 |

**(2) (110)+O<sub>N3</sub>**

110-on

|                     |                    |                     |
|---------------------|--------------------|---------------------|
| 1.000000000000000   |                    |                     |
| 10.3476600646972994 | 0.000000000000000  | 0.000000000000000   |
| 0.000000000000000   | 5.5169796943664604 | 0.000000000000000   |
| 0.000000000000000   | 0.000000000000000  | 53.7977371215820028 |

N O Ta

68 2 42

Direct

|                    |                    |                    |
|--------------------|--------------------|--------------------|
| 0.2488137881830602 | 0.6104454534203601 | 0.2809386689593837 |
| 0.2494810643393664 | 0.9083514496688748 | 0.3469934585308334 |
| 0.2490351935821864 | 0.1960546909605589 | 0.6866562477341904 |
| 0.2501959229891454 | 0.1591901114479252 | 0.4156928889280926 |
| 0.2500967131449603 | 0.4111251958301009 | 0.4837855468507093 |
| 0.2502062343301118 | 0.6625713962345207 | 0.5518785400948254 |
| 0.2499738843305447 | 0.9117621587477986 | 0.6200427632769588 |
| 0.7500283729054465 | 0.0818445271340634 | 0.3799450837778042 |
| 0.7498082008963249 | 0.3307304229382189 | 0.4481103649572724 |
| 0.7499146939109513 | 0.5820958270368159 | 0.5162083607681817 |
| 0.7497776534263054 | 0.8342487950388180 | 0.5843069606714910 |
| 0.7509620666683094 | 0.7979105116489582 | 0.3133468970425401 |
| 0.7504869530406522 | 0.0853544177004079 | 0.6529990762394096 |
| 0.7512309664790497 | 0.3833302616147810 | 0.7190540231290955 |
| 0.3838596745049428 | 0.1397907422221080 | 0.2974684349360759 |
| 0.3805643874208810 | 0.4103203630608910 | 0.3671325711758910 |
| 0.3805391628013448 | 0.6631111654698927 | 0.4351059117717117 |
| 0.3806644005949443 | 0.9139263894656828 | 0.5031063172903698 |
| 0.4267361922298108 | 0.2058253906039079 | 0.4529707532742782 |
| 0.4262092051916900 | 0.4562120373941753 | 0.5210535905415160 |
| 0.4261410119160188 | 0.7073471349720513 | 0.5892872172313202 |
| 0.4247491367121282 | 0.9618864131150018 | 0.6583376678723317 |
| 0.3807723800440642 | 0.1646242318731047 | 0.5710996938551319 |
| 0.3807762861868176 | 0.4170190077467318 | 0.6385045994861633 |
| 0.4294316132563678 | 0.6850580666287339 | 0.3176984401371115 |
| 0.4274273016488269 | 0.9551167699136854 | 0.3848913549543478 |
| 0.4262445290746332 | 0.2675115134847961 | 0.7244619850278149 |
| 0.8732351145872230 | 0.3054613515489871 | 0.2929837570064363 |
| 0.8811763915937765 | 0.5777388933844018 | 0.3618394130980970 |
| 0.8806458811444332 | 0.8287749598515438 | 0.4289277331002705 |
| 0.9224357716979199 | 0.7404238977949601 | 0.2745497851157341 |
| 0.9272016791267415 | 0.0378455948374649 | 0.6149451705746860 |
| 0.9310699968098282 | 0.3149168650769414 | 0.6820749348565686 |
| 0.8806665535469169 | 0.0792703244814926 | 0.4968617644972444 |
| 0.8806499946582081 | 0.3302810896602602 | 0.5648370881265953 |
| 0.8800569062954332 | 0.5826802836393791 | 0.6326819543191865 |
| 0.8837975082027485 | 0.8530327891472032 | 0.7028191175593561 |
| 0.9264379768000038 | 0.0323155335196188 | 0.3421353080720715 |
| 0.9259582249405164 | 0.2858105269294982 | 0.4108461168689410 |
| 0.9260520642464063 | 0.5369611261461688 | 0.4789598476961957 |



|                    |                    |                    |
|--------------------|--------------------|--------------------|
| 0.9266031766396131 | 0.7873549862222166 | 0.5470012320437194 |
| 0.1162540469234625 | 0.1408094493606727 | 0.2971892407829235 |
| 0.1199510455060869 | 0.4110209716900320 | 0.3673238531094861 |
| 0.1193437954875015 | 0.6630507434218886 | 0.4351481433279534 |
| 0.1193386502615788 | 0.9139023945591858 | 0.5031165457440427 |
| 0.0734080046172759 | 0.2059845012330021 | 0.4529893669430869 |
| 0.0739618537845187 | 0.4562806636308528 | 0.5210333146097831 |
| 0.0740557446787175 | 0.7075856659168190 | 0.5891480201247230 |
| 0.0735569788387230 | 0.9614063503106776 | 0.6578584357086994 |
| 0.1193391920665636 | 0.1645326309008412 | 0.5710573895077824 |
| 0.1188197172155951 | 0.4158786323780104 | 0.6381456999433707 |
| 0.1268798695270854 | 0.6883727813694914 | 0.7069689292580855 |
| 0.0689401424381484 | 0.6789053448134144 | 0.3179121507037144 |
| 0.0727933933073830 | 0.9557502685620610 | 0.3850462532315973 |
| 0.0775266120882592 | 0.2534830726665827 | 0.7254554808577038 |
| 0.6192215774962122 | 0.5764825935767461 | 0.3614990388146260 |
| 0.6192403978075800 | 0.8286730854197386 | 0.4288886589332204 |
| 0.5737539708138538 | 0.7260461714047464 | 0.2755448133404801 |
| 0.5724817946604970 | 0.0383617481231483 | 0.6151169345497993 |
| 0.5704675825336148 | 0.3085768986785603 | 0.6823116170592297 |
| 0.6193622699920576 | 0.0792525162561214 | 0.4968760302218306 |
| 0.6194805253733195 | 0.3302217872359244 | 0.5648904922763542 |
| 0.6194000722030737 | 0.5831808497382914 | 0.6328824506656263 |
| 0.6161446786785862 | 0.8537384033222293 | 0.7024741057926372 |
| 0.5750977754544990 | 0.0314726322922830 | 0.3416887904475555 |
| 0.5738555415545242 | 0.2859939012667443 | 0.4107150472626216 |
| 0.5737997906734182 | 0.5370061951450730 | 0.4789391428838729 |
| 0.5732550561842434 | 0.7875455806010383 | 0.5470219605110649 |
| 0.3819831704407491 | 0.7033863841163632 | 0.7097545381855664 |
| 0.6182239870181396 | 0.2908581368059203 | 0.2904937054087453 |
| 0.2499659140127500 | 0.1464675504502878 | 0.3772900340844043 |
| 0.2500402141795700 | 0.3988081197791584 | 0.4454062854538403 |
| 0.2501259075904471 | 0.6497930755227536 | 0.5132722195462873 |
| 0.2501842583493322 | 0.9000487881112958 | 0.5810292830415481 |
| 0.2477724205821494 | 0.8926164091776451 | 0.3084929672322759 |
| 0.2486760655317297 | 0.1548875620109466 | 0.6482768494191083 |
| 0.2439991843045774 | 0.4051076306807924 | 0.7147135739989035 |
| 0.7559707541132329 | 0.5887667319594917 | 0.2853066453112006 |
| 0.7513191373320340 | 0.8386555474547200 | 0.3517277842234952 |
| 0.7522160978420451 | 0.1010780456085038 | 0.6914898730524568 |
| 0.7498388130183449 | 0.0932721937076992 | 0.4189631140686125 |
| 0.7498889556364695 | 0.3434146800932575 | 0.4867189405410969 |
| 0.7499612930305686 | 0.5945626048192394 | 0.5545912226738245 |
| 0.7499998789365827 | 0.8471248006574077 | 0.6227122886558797 |
| 0.9405371507391393 | 0.0013366639231344 | 0.3040066846102210 |
| 0.9407039760359511 | 0.2580399830760696 | 0.3731349089100435 |
| 0.9403056054534383 | 0.5119539657247018 | 0.4411109327212610 |
| 0.9403638700472051 | 0.7628484502214284 | 0.5089952810681557 |
| 0.9402348698215098 | 0.0134460543570781 | 0.5767422210173795 |
| 0.9398695944815323 | 0.2656434616314796 | 0.6440864178802916 |
| 0.9397270323781177 | 0.4998693318713735 | 0.7113880362813668 |
| 0.4293628633831196 | 0.4936934926302388 | 0.2884597589321611 |
| 0.4411146657055653 | 0.7269777886181618 | 0.3559098813038599 |
| 0.4400600948295173 | 0.9799425541204116 | 0.4231910306489663 |
| 0.4404083855725149 | 0.2304988004972957 | 0.4909855550122437 |
| 0.4403844917227066 | 0.4817253017107633 | 0.5589475694996532 |
| 0.4397341973027503 | 0.7373553013184335 | 0.6270961307135350 |
| 0.4430107226632219 | 0.0106366502969647 | 0.6963165918704313 |

|                    |                     |                    |
|--------------------|---------------------|--------------------|
| 0.5569575740914564 | -0.0169740217851894 | 0.3037332500727863 |
| 0.5602347355299123 | 0.2562123570956216  | 0.3729127780057275 |
| 0.5596293431865713 | 0.5115685922055919  | 0.4410463151625827 |
| 0.5596130187156829 | 0.7626595826682249  | 0.5090043950124423 |
| 0.5599445417153527 | 0.0133526755776262  | 0.5768060185437064 |
| 0.5588310616443040 | 0.2665558798734271  | 0.6441005383303251 |
| 0.5706415883609176 | 0.5000360328861941  | 0.7115562656309442 |
| 0.0602434467992729 | 0.4939728958401833  | 0.2885941879670891 |
| 0.0601604754920582 | 0.7280361155360480  | 0.3558963438112173 |
| 0.0597604026389005 | 0.9799103875597146  | 0.4232473139296923 |
| 0.0596558409005301 | 0.2303111031317037  | 0.4909943787241607 |
| 0.0596966942634214 | 0.4813556931664332  | 0.5588804581774002 |
| 0.0593062926977891 | 0.7355924704335755  | 0.6268539647823577 |
| 0.0594959505290830 | 0.9925242938639626  | 0.6959799945489344 |

**(3) (100)**

100

|                     |                     |                     |
|---------------------|---------------------|---------------------|
| 1.0000000000000000  |                     |                     |
| 10.3189349201334437 | 0.0000000000000000  | 0.0000000000000000  |
| 0.0000000000000000  | 10.3476600646972638 | 0.0000000000000000  |
| 0.0000000000000000  | 0.0000000000000000  | 34.5370260389971691 |

N    Ta  
70    42

Direct

|                    |                    |                    |
|--------------------|--------------------|--------------------|
| 0.7519469170495441 | 0.2500000000000000 | 0.3878863845313774 |
| 0.7672251792071307 | 0.2500000000000000 | 0.5000000000000000 |
| 0.7519469170495441 | 0.2500000000000000 | 0.6121136154686226 |
| 0.2790979371765374 | 0.2500000000000000 | 0.3310120054115231 |
| 0.2633812685514130 | 0.2500000000000000 | 0.4428927635503754 |
| 0.2633812685514130 | 0.2500000000000000 | 0.5571072364496246 |
| 0.2790979371765374 | 0.2500000000000000 | 0.6689879945884769 |
| 0.2480530829504559 | 0.7500000000000000 | 0.3878863845313774 |
| 0.2327748207928693 | 0.7500000000000000 | 0.5000000000000000 |
| 0.2480530829504559 | 0.7500000000000000 | 0.6121136154686226 |
| 0.7209020628234697 | 0.7500000000000000 | 0.3310120054115231 |
| 0.7366187314485870 | 0.7500000000000000 | 0.4428927635503754 |
| 0.7366187314485870 | 0.7500000000000000 | 0.5571072364496246 |
| 0.7209020628234697 | 0.7500000000000000 | 0.6689879945884769 |
| 0.0497313358857170 | 0.3818868103450015 | 0.3837114537108803 |
| 0.0470006007770394 | 0.3803943707624526 | 0.5000000000000000 |
| 0.0497313358857170 | 0.3818868103450015 | 0.6162885462891197 |
| 0.3150475583086489 | 0.4305792501948460 | 0.3873858796585026 |
| 0.3060721183644830 | 0.4266547310455877 | 0.5000000000000000 |
| 0.3150475583086489 | 0.4305792501948460 | 0.6126141203414974 |
| 0.5423817518412832 | 0.3813944451314057 | 0.3272037839610817 |
| 0.5461959468704976 | 0.3804914457284596 | 0.4451458061714959 |
| 0.5461959468704976 | 0.3804914457284596 | 0.5548541938285041 |
| 0.5423817518412832 | 0.3813944451314057 | 0.6727962160389183 |
| 0.7967783097919252 | 0.4207040570777139 | 0.3293403924464613 |
| 0.8100278676124617 | 0.4251935142295409 | 0.4427374078613084 |
| 0.8100278676124617 | 0.4251935142295409 | 0.5572625921386916 |
| 0.7967783097919252 | 0.4207040570777139 | 0.6706596075535387 |
| 0.9502686641142901 | 0.8818868103450015 | 0.3837114537108803 |
| 0.9529993992229606 | 0.8803943707624526 | 0.5000000000000000 |
| 0.9502686641142901 | 0.8818868103450015 | 0.6162885462891197 |
| 0.6849524416913511 | 0.9305792501948460 | 0.3873858796585026 |
| 0.6939278816355170 | 0.9266547310455877 | 0.5000000000000000 |
| 0.6849524416913511 | 0.9305792501948460 | 0.6126141203414974 |

|                    |                    |                    |
|--------------------|--------------------|--------------------|
| 0.4576182481587168 | 0.8813944451314057 | 0.3272037839610817 |
| 0.4538040531295024 | 0.8804914457284596 | 0.4451458061714959 |
| 0.4538040531295024 | 0.8804914457284596 | 0.5548541938285041 |
| 0.4576182481587168 | 0.8813944451314057 | 0.6727962160389183 |
| 0.2032216902080748 | 0.9207040570777139 | 0.3293403924464613 |
| 0.1899721323875383 | 0.9251935142295409 | 0.4427374078613084 |
| 0.1899721323875383 | 0.9251935142295409 | 0.5572625921386916 |
| 0.2032216902080748 | 0.9207040570777139 | 0.6706596075535387 |
| 0.0497313358857170 | 0.1181131896549985 | 0.3837114537108803 |
| 0.0470006007770394 | 0.1196056292375474 | 0.5000000000000000 |
| 0.0497313358857170 | 0.1181131896549985 | 0.6162885462891197 |
| 0.3150475583086489 | 0.0694207498051540 | 0.3873858796585026 |
| 0.3060721183644830 | 0.0733452689544123 | 0.5000000000000000 |
| 0.3150475583086489 | 0.0694207498051540 | 0.6126141203414974 |
| 0.5423817518412832 | 0.1186055548685943 | 0.3272037839610817 |
| 0.5461959468704976 | 0.1195085542715404 | 0.4451458061714959 |
| 0.5461959468704976 | 0.1195085542715404 | 0.5548541938285041 |
| 0.5423817518412832 | 0.1186055548685943 | 0.6727962160389183 |
| 0.7967783097919252 | 0.0792959429222861 | 0.3293403924464613 |
| 0.8100278676124617 | 0.0748064857704591 | 0.4427374078613084 |
| 0.8100278676124617 | 0.0748064857704591 | 0.5572625921386916 |
| 0.7967783097919252 | 0.0792959429222861 | 0.6706596075535387 |
| 0.9502686641142901 | 0.6181131896549985 | 0.3837114537108803 |
| 0.9529993992229606 | 0.6196056292375474 | 0.5000000000000000 |
| 0.9502686641142901 | 0.6181131896549985 | 0.6162885462891197 |
| 0.6849524416913511 | 0.5694207498051540 | 0.3873858796585026 |
| 0.6939278816355170 | 0.5733452689544123 | 0.5000000000000000 |
| 0.6849524416913511 | 0.5694207498051540 | 0.6126141203414974 |
| 0.4576182481587168 | 0.6186055548685943 | 0.3272037839610817 |
| 0.4538040531295024 | 0.6195085542715404 | 0.4451458061714959 |
| 0.4538040531295024 | 0.6195085542715404 | 0.5548541938285041 |
| 0.4576182481587168 | 0.6186055548685943 | 0.6727962160389183 |
| 0.2032216902080748 | 0.5792959429222861 | 0.3293403924464613 |
| 0.1899721323875383 | 0.5748064857704591 | 0.4427374078613084 |
| 0.1899721323875383 | 0.5748064857704591 | 0.5572625921386916 |
| 0.2032216902080748 | 0.5792959429222861 | 0.6706596075535387 |
| 0.1983732929609872 | 0.2500000000000000 | 0.3844614097993428 |
| 0.1965157769180763 | 0.2500000000000000 | 0.5000000000000000 |
| 0.1983732929609872 | 0.2500000000000000 | 0.6155385902006572 |
| 0.6939148871477272 | 0.2500000000000000 | 0.3346689145283932 |
| 0.6974682665211773 | 0.2500000000000000 | 0.4447350560625907 |
| 0.6974682665211773 | 0.2500000000000000 | 0.5552649439374093 |
| 0.6939148871477272 | 0.2500000000000000 | 0.6653310854716068 |
| 0.8016267070390128 | 0.7500000000000000 | 0.3844614097993428 |
| 0.8034842230819237 | 0.7500000000000000 | 0.5000000000000000 |
| 0.8016267070390128 | 0.7500000000000000 | 0.6155385902006572 |
| 0.3060851128522728 | 0.7500000000000000 | 0.3346689145283932 |
| 0.3025317334788227 | 0.7500000000000000 | 0.4447350560625907 |
| 0.3025317334788227 | 0.7500000000000000 | 0.5552649439374093 |
| 0.3060851128522728 | 0.7500000000000000 | 0.6653310854716068 |
| 0.1339068177944256 | 0.9394205631286781 | 0.3836993237531132 |
| 0.1325600883915428 | 0.9402983366497679 | 0.5000000000000000 |
| 0.1339068177944256 | 0.9394205631286781 | 0.6163006762468868 |
| 0.6387702311087224 | 0.9402098455793535 | 0.3336764532395406 |
| 0.6337790296402659 | 0.9414881102613180 | 0.4445284724383143 |
| 0.6337790296402588 | 0.9414881102613180 | 0.5554715275616857 |
| 0.6387702311087153 | 0.9402098455793535 | 0.6663235467604594 |
| 0.8660931822055815 | 0.4394205631286781 | 0.3836993237531132 |

|                    |                    |                    |
|--------------------|--------------------|--------------------|
| 0.8674399116084643 | 0.4402983366497679 | 0.5000000000000000 |
| 0.8660931822055815 | 0.4394205631286781 | 0.6163006762468868 |
| 0.3612297688912847 | 0.4402098455793535 | 0.3336764532395406 |
| 0.3662209703597412 | 0.4414881102613180 | 0.4445284724383143 |
| 0.3662209703597412 | 0.4414881102613180 | 0.5554715275616857 |
| 0.3612297688912847 | 0.4402098455793535 | 0.6663235467604594 |
| 0.1339068177944256 | 0.5605794368713219 | 0.3836993237531132 |
| 0.1325600883915428 | 0.5597016633502321 | 0.5000000000000000 |
| 0.1339068177944256 | 0.5605794368713219 | 0.6163006762468868 |
| 0.6387702311087224 | 0.5597901544206465 | 0.3336764532395406 |
| 0.6337790296402659 | 0.5585118897386820 | 0.4445284724383143 |
| 0.6337790296402588 | 0.5585118897386820 | 0.5554715275616857 |
| 0.6387702311087153 | 0.5597901544206465 | 0.6663235467604594 |
| 0.8660931822055815 | 0.0605794368713219 | 0.3836993237531132 |
| 0.8674399116084643 | 0.0597016633502321 | 0.5000000000000000 |
| 0.8660931822055815 | 0.0605794368713219 | 0.6163006762468868 |
| 0.3612297688912847 | 0.0597901544206465 | 0.3336764532395406 |
| 0.3662209703597412 | 0.0585118897386820 | 0.4445284724383143 |
| 0.3662209703597412 | 0.0585118897386820 | 0.5554715275616857 |
| 0.3612297688912847 | 0.0597901544206465 | 0.6663235467604594 |

**(4) (100)+O<sub>N3</sub>**

100-on

|                     |                     |                     |
|---------------------|---------------------|---------------------|
| 1.0000000000000000  |                     |                     |
| 10.3189349201333993 | 0.0000000000000000  | 0.0000000000000000  |
| 0.0000000000000000  | 10.3476600646972994 | 0.0000000000000000  |
| 0.0000000000000000  | 0.0000000000000000  | 34.5370260389971975 |

N O Ta

68 2 42

Direct

|                    |                    |                    |
|--------------------|--------------------|--------------------|
| 0.7513311296279837 | 0.2484547775598507 | 0.3873863531093513 |
| 0.7657956978083684 | 0.2493441929350877 | 0.5000000000000000 |
| 0.7513311296279837 | 0.2484547775598507 | 0.6126136468906486 |
| 0.2802375066088215 | 0.2501274070837847 | 0.3303609453911612 |
| 0.2639751736591089 | 0.2501844003250935 | 0.4428187813529499 |
| 0.2639751736591089 | 0.2501844003250935 | 0.5571812186470502 |
| 0.2802375066088215 | 0.2501274070837847 | 0.6696390546088383 |
| 0.2500239188251851 | 0.7490840816836122 | 0.3873343386549628 |
| 0.2344320253763904 | 0.7482523816351412 | 0.5000000000000000 |
| 0.2500239188251851 | 0.7490840816836122 | 0.6126656613450374 |
| 0.7199474735521447 | 0.7504592333577488 | 0.3298896482339109 |
| 0.7367738944004671 | 0.7499383126507236 | 0.4428229107855567 |
| 0.7367738944004671 | 0.7499383126507236 | 0.5571770892144434 |
| 0.7199474735521447 | 0.7504592333577488 | 0.6701103517660891 |
| 0.0492931933907886 | 0.3821774110705915 | 0.3831144962704990 |
| 0.0471801538892062 | 0.3799515264215856 | 0.5000000000000000 |
| 0.0492931933907886 | 0.3821774110705915 | 0.6168855037295011 |
| 0.3157080074876779 | 0.4314750485149201 | 0.3870343592236301 |
| 0.3059228617818372 | 0.4296719125291005 | 0.5000000000000000 |
| 0.3157080074876779 | 0.4314750485149201 | 0.6129656407763701 |
| 0.5465071407625692 | 0.3799567735713343 | 0.4446958498977664 |
| 0.5465071407625692 | 0.3799567735713343 | 0.5553041501022338 |
| 0.7889673089602195 | 0.4210997369288133 | 0.3291156429493525 |
| 0.8109661473276876 | 0.4234821596508224 | 0.4422146982515984 |
| 0.8109661473276876 | 0.4234821596508224 | 0.5577853017484018 |
| 0.7889673089602195 | 0.4210997369288133 | 0.6708843570506479 |
| 0.9498514910858126 | 0.8822017534284620 | 0.3837057635123680 |
| 0.9527031178053195 | 0.8798642127235646 | 0.5000000000000000 |

|                    |                    |                    |
|--------------------|--------------------|--------------------|
| 0.9498514910858126 | 0.8822017534284620 | 0.6162942364876318 |
| 0.6854367836608645 | 0.9317558703011516 | 0.3870148924874430 |
| 0.6944536485005093 | 0.9299005970545668 | 0.5000000000000000 |
| 0.6854367836608645 | 0.9317558703011516 | 0.6129851075125567 |
| 0.4585519602578569 | 0.8831829636897225 | 0.3255676312798773 |
| 0.4538075742122171 | 0.8801865812904526 | 0.4448119216195520 |
| 0.4538075742122171 | 0.8801865812904526 | 0.5551880783804486 |
| 0.4585519602578569 | 0.8831829636897225 | 0.6744323687201231 |
| 0.2040323051256962 | 0.9199814650269346 | 0.3291999875358959 |
| 0.1887737675989025 | 0.9227791924086179 | 0.4425121086815180 |
| 0.1887737675989025 | 0.9227791924086179 | 0.5574878913184815 |
| 0.2040323051256962 | 0.9199814650269346 | 0.6708000124641043 |
| 0.0501788141616823 | 0.1179861902093950 | 0.3836311008351626 |
| 0.0479030869557570 | 0.1187939450388650 | 0.5000000000000000 |
| 0.0501788141616823 | 0.1179861902093950 | 0.6163688991648378 |
| 0.3132621203435643 | 0.0681420115941256 | 0.3872860592790403 |
| 0.3059315100239264 | 0.0705450884192852 | 0.5000000000000000 |
| 0.3132621203435643 | 0.0681420115941256 | 0.6127139407209601 |
| 0.5410469919815931 | 0.1220698429855049 | 0.3296534306560268 |
| 0.5466005947199453 | 0.1189791850978507 | 0.4447550944013993 |
| 0.5466005947199453 | 0.1189791850978507 | 0.5552449055986012 |
| 0.5410469919815931 | 0.1220698429855049 | 0.6703465693439732 |
| 0.7967267146866112 | 0.0808597946205768 | 0.3282242186666241 |
| 0.8128890496348758 | 0.0757618373228733 | 0.4423281254751135 |
| 0.8128890496348758 | 0.0757618373228733 | 0.5576718745248870 |
| 0.7967267146866112 | 0.0808597946205768 | 0.6717757813333760 |
| 0.9498107693520328 | 0.6182813908026173 | 0.3833478694890782 |
| 0.9520305184065984 | 0.6189373121415570 | 0.5000000000000000 |
| 0.9498107693520328 | 0.6182813908026173 | 0.6166521305109215 |
| 0.6860539235421749 | 0.5699365668497829 | 0.3871195612743192 |
| 0.6942509447537704 | 0.5702293478035250 | 0.5000000000000000 |
| 0.6860539235421749 | 0.5699365668497829 | 0.6128804387256812 |
| 0.4596100104607937 | 0.6151841856921400 | 0.3283390550038561 |
| 0.4538242678184635 | 0.6187963818876738 | 0.4448748388176699 |
| 0.4538242678184635 | 0.6187963818876738 | 0.5551251611823296 |
| 0.4596100104607937 | 0.6151841856921400 | 0.6716609449961438 |
| 0.2075556368433928 | 0.5761984254640760 | 0.3284520579278868 |
| 0.1871793771282030 | 0.5753169071682499 | 0.4421845678897633 |
| 0.1871793771282030 | 0.5753169071682499 | 0.5578154321102368 |
| 0.2075556368433928 | 0.5761984254640760 | 0.6715479420721127 |
| 0.5415978597231752 | 0.3857204296869869 | 0.3222923467056323 |
| 0.5415978597231752 | 0.3857204296869869 | 0.6777076532943680 |
| 0.1997894934954096 | 0.2497098958826579 | 0.3845293537394068 |
| 0.1972972605733715 | 0.2499247549305401 | 0.5000000000000000 |
| 0.1997894934954096 | 0.2497098958826579 | 0.6154706462605927 |
| 0.6931096479645671 | 0.2434375440214345 | 0.3343921183651811 |
| 0.6976552185344367 | 0.2492517779682349 | 0.4446092803337420 |
| 0.6976552185344367 | 0.2492517779682349 | 0.5553907196662575 |
| 0.6931096479645671 | 0.2434375440214345 | 0.6656078816348192 |
| 0.8004713789537604 | 0.7511205695523002 | 0.3851101555709762 |
| 0.8026247662050776 | 0.7501435365102916 | 0.5000000000000000 |
| 0.8004713789537604 | 0.7511205695523002 | 0.6148898444290238 |
| 0.3096368692887065 | 0.7506501752094580 | 0.3344122168020927 |
| 0.3029276009018841 | 0.7495542723378879 | 0.4445819424426962 |
| 0.3029276009018841 | 0.7495542723378879 | 0.5554180575573036 |
| 0.3096368692887065 | 0.7506501752094580 | 0.6655877831979075 |
| 0.1344597152680122 | 0.9382600945196931 | 0.3838585669341052 |
| 0.1331675117045379 | 0.9398386074724341 | 0.5000000000000000 |

|                    |                    |                    |
|--------------------|--------------------|--------------------|
| 0.1344597152680122 | 0.9382600945196931 | 0.6161414330658951 |
| 0.6400061728158719 | 0.9414357153508289 | 0.3334396947659800 |
| 0.6336891382196657 | 0.9395459621482062 | 0.4444476035774684 |
| 0.6336891382196586 | 0.9395459621482062 | 0.5555523964225311 |
| 0.6400061728158648 | 0.9414357153508289 | 0.6665603052340199 |
| 0.8637477503699845 | 0.4389827667781896 | 0.3833819413772110 |
| 0.8664274865769475 | 0.4397647718860447 | 0.5000000000000000 |
| 0.8637477503699845 | 0.4389827667781896 | 0.6166180586227890 |
| 0.3540429541599189 | 0.4432685780132097 | 0.3332383703614917 |
| 0.3668921498666879 | 0.4397070797952312 | 0.4445122617581424 |
| 0.3668921498666879 | 0.4397070797952312 | 0.5554877382418576 |
| 0.3540429541599189 | 0.4432685780132097 | 0.6667616296385083 |
| 0.1323947611017125 | 0.5597061702451019 | 0.3843002946281602 |
| 0.1320956777503345 | 0.5591076947373302 | 0.5000000000000000 |
| 0.1323947611017125 | 0.5597061702451019 | 0.6156997053718395 |
| 0.6449863983539161 | 0.5684987981788705 | 0.3331940358114016 |
| 0.6341316078659643 | 0.5593364893242598 | 0.4444968802045010 |
| 0.6341316078659572 | 0.5593364893242598 | 0.5555031197954984 |
| 0.6449863983539090 | 0.5684987981788705 | 0.6668059641885985 |
| 0.8673230240236096 | 0.0613113893009957 | 0.3842623525010389 |
| 0.8676122713412245 | 0.0589190321294247 | 0.5000000000000000 |
| 0.8673230240236096 | 0.0613113893009957 | 0.6157376474989612 |
| 0.3578338072931454 | 0.0603237123710389 | 0.3336211409641818 |
| 0.3664671348556762 | 0.0595442338937415 | 0.4445348530780952 |
| 0.3664671348556762 | 0.0595442338937415 | 0.5554651469219052 |
| 0.3578338072931454 | 0.0603237123710389 | 0.6663788590358181 |

**(5) [110]<sub>mol</sub>**

110-water-mol

|                     |                     |                     |
|---------------------|---------------------|---------------------|
| 1.0000000000000000  |                     |                     |
| 10.3476600646972994 | 0.0000000000000000  | 0.0000000000000000  |
| 0.0000000000000000  | 11.0339593887328995 | 0.0000000000000010  |
| 0.0000000000000000  | 0.0000000000000000  | 44.1809380160793026 |

|   |     |   |    |
|---|-----|---|----|
| H | N   | O | Ta |
| 2 | 140 | 1 | 84 |

Selective dynamics

Direct

|                    |                    |                    |   |   |   |
|--------------------|--------------------|--------------------|---|---|---|
| 0.5232339543039612 | 0.1826456656239864 | 0.5879160229570530 | T | T | T |
| 0.6707875710832404 | 0.2135951665319027 | 0.5837182607822383 | T | T | T |
| 0.2500000000000000 | 0.3293039861898137 | 0.0059393964048695 | F | F | F |
| 0.2500000000000000 | 0.4547089975823013 | 0.0886492757288480 | F | F | F |
| 0.2485756132093741 | 0.0932759249978512 | 0.5002025953947150 | T | T | T |
| 0.2499438158634626 | 0.0802160786716339 | 0.1713195782158242 | T | T | T |
| 0.2498933955846248 | 0.2058156869228910 | 0.2540061251476893 | T | T | T |
| 0.2499509255668232 | 0.3310145741985084 | 0.3367016718523012 | T | T | T |
| 0.2497126951618213 | 0.4540811007739936 | 0.4194096566371752 | T | T | T |
| 0.7500000000000000 | 0.0404308394626796 | 0.1278272917373684 | F | F | F |
| 0.7499193783578177 | 0.1637747890850856 | 0.2105956894167309 | T | T | T |
| 0.7498008281615351 | 0.2883852668063700 | 0.2933591538827077 | T | T | T |
| 0.7497180953913226 | 0.4133456160711568 | 0.3761514578200040 | T | T | T |
| 0.7500000000000000 | 0.4150258280701919 | 0.0451174124133900 | F | F | F |
| 0.7494949876321613 | 0.0386348301866077 | 0.4596776019896588 | T | T | T |
| 0.7552117516050098 | 0.1828429148452652 | 0.5397028254381065 | T | T | T |
| 0.3805899955332279 | 0.0811638913835608 | 0.0294058438053355 | F | F | F |
| 0.3805899955332279 | 0.2065689027760556 | 0.1121157231293139 | F | F | F |
| 0.3815798133836322 | 0.3308143693484951 | 0.1947622133430762 | T | T | T |
| 0.3814918301479959 | 0.4557731942192876 | 0.2774665865562971 | T | T | T |
| 0.4252809836911807 | 0.1025248990101832 | 0.2165479620004255 | T | T | T |

|                    |                    |                    |   |   |   |
|--------------------|--------------------|--------------------|---|---|---|
| 0.4253414520077075 | 0.2275903676091326 | 0.2992990526559427 | T | T | T |
| 0.4255585521112922 | 0.3530902826920956 | 0.3820463203048484 | T | T | T |
| 0.4251545278866863 | 0.4779256046138037 | 0.4654334420623875 | T | T | T |
| 0.3810922134450341 | 0.0809137656943484 | 0.3601933555090058 | T | T | T |
| 0.3814079674107234 | 0.2048986820381654 | 0.4421781522898495 | T | T | T |
| 0.3794154471561279 | 0.3381600029889892 | 0.5267902503759085 | T | T | T |
| 0.4261699933558702 | 0.3522211622490019 | 0.0510568088182595 | F | F | F |
| 0.4261699933558702 | 0.4776261736414895 | 0.1337666881422379 | F | F | F |
| 0.4188030739350211 | 0.1173328777999458 | 0.5479037256419832 | T | T | T |
| 0.8805899955332279 | 0.1631659228764377 | 0.0216509650129240 | F | F | F |
| 0.8805899955332279 | 0.2885709342689324 | 0.1043608443369095 | F | F | F |
| 0.8814531687658637 | 0.4136250335246522 | 0.1870938419217721 | T | T | T |
| 0.9261699933558702 | 0.3921086520110038 | 0.0000000000000000 | F | F | F |
| 0.9245133971466502 | 0.0153244207660494 | 0.4133087664099836 | T | T | T |
| 0.9290982539111063 | 0.1525865167031456 | 0.4943777391422380 | T | T | T |
| 0.8815179166637140 | 0.0384364934713409 | 0.2698086800315306 | T | T | T |
| 0.8816465775617333 | 0.1635426438264896 | 0.3525449717217932 | T | T | T |
| 0.8815242892433164 | 0.2880179348806631 | 0.4347197879498619 | T | T | T |
| 0.8817444556742760 | 0.4215515694516982 | 0.5195158023043838 | T | T | T |
| 0.9261699933558702 | 0.0175136634034914 | 0.0827098793239784 | F | F | F |
| 0.9257581482604543 | 0.1418536193457071 | 0.1654672607297409 | T | T | T |
| 0.9253376420976003 | 0.2666803758051363 | 0.2481184548087854 | T | T | T |
| 0.9248495126000129 | 0.3920817812800206 | 0.3307255127086584 | T | T | T |
| 0.1194100044667721 | 0.0811638913835608 | 0.0294058438053355 | F | F | F |
| 0.1194100044667721 | 0.2065689027760556 | 0.1121157231293139 | F | F | F |
| 0.1182797195401265 | 0.3308394484530712 | 0.1947867486702083 | T | T | T |
| 0.1182458536164539 | 0.4558360524723373 | 0.2774905942878357 | T | T | T |
| 0.0745725549800427 | 0.1025119484314297 | 0.2165466824186401 | T | T | T |
| 0.0744370810661472 | 0.2277106291859486 | 0.2992715340436944 | T | T | T |
| 0.0740377478347662 | 0.3535899369486923 | 0.3818733724440220 | T | T | T |
| 0.0742772135130206 | 0.4774748643861995 | 0.4654278407265119 | T | T | T |
| 0.1183993925286065 | 0.0809991147205749 | 0.3601770650557949 | T | T | T |
| 0.1184061908231624 | 0.2046968220504803 | 0.4415810368092221 | T | T | T |
| 0.1226905270115491 | 0.3406211999035598 | 0.5274338135395572 | T | T | T |
| 0.0738300066441298 | 0.3522211622490019 | 0.0510568088182595 | F | F | F |
| 0.0738300066441298 | 0.4776261736414895 | 0.1337666881422379 | F | F | F |
| 0.0739675541457452 | 0.1202165327267807 | 0.5472671441789099 | T | T | T |
| 0.6194100044667721 | 0.1631659228764377 | 0.0216509650129240 | F | F | F |
| 0.6194100044667721 | 0.2885709342689324 | 0.1043608443369095 | F | F | F |
| 0.6184274363944772 | 0.4136591550857294 | 0.1871160509627013 | T | T | T |
| 0.5738300066441298 | 0.3921086520110038 | 0.0000000000000000 | F | F | F |
| 0.5743647855074900 | 0.0169119782422619 | 0.4137105607776995 | T | T | T |
| 0.5718304352647029 | 0.1526050054117506 | 0.4960237061686223 | T | T | T |
| 0.6182054634989306 | 0.0384818741093259 | 0.2698715659927710 | T | T | T |
| 0.6179355677532887 | 0.1636772280328352 | 0.3527406305359245 | T | T | T |
| 0.6180332550605263 | 0.2885739996391686 | 0.4356493882550164 | T | T | T |
| 0.6173064097999326 | 0.4216341586116705 | 0.5201926949797528 | T | T | T |
| 0.5738300066441298 | 0.0175136634034914 | 0.0827098793239784 | F | F | F |
| 0.5741603688450855 | 0.1418717849777124 | 0.1654650790238329 | T | T | T |
| 0.5743910792472222 | 0.2666761882770842 | 0.2481204789749218 | T | T | T |
| 0.5746047596018823 | 0.3920862885770878 | 0.3307539616467646 | T | T | T |
| 0.2500000000000000 | 0.8293039861898137 | 0.0059393964048695 | F | F | F |
| 0.2500000000000000 | 0.9547089975823013 | 0.0886492757288480 | F | F | F |
| 0.2497635799818550 | 0.5929605669562158 | 0.5005037758596801 | T | T | T |
| 0.2499432847015195 | 0.5802095589866146 | 0.1713189934845172 | T | T | T |
| 0.2499139580828494 | 0.7058200266972844 | 0.2540009006298055 | T | T | T |
| 0.2500466869851750 | 0.8308076127043791 | 0.3367038293488775 | T | T | T |
| 0.2499606812486087 | 0.9535789223324741 | 0.4193835618539700 | T | T | T |



|                    |                    |                    |   |   |   |
|--------------------|--------------------|--------------------|---|---|---|
| 0.7500000000000000 | 0.5404308394626796 | 0.1278272917373684 | F | F | F |
| 0.7499035110270879 | 0.6637848649081429 | 0.2105929955863484 | T | T | T |
| 0.7496869468441201 | 0.7883987787764438 | 0.2933686140596979 | T | T | T |
| 0.7492257602632447 | 0.9140357383441663 | 0.3761183985366862 | T | T | T |
| 0.7500000000000000 | 0.9150258280701919 | 0.0451174124133900 | F | F | F |
| 0.7497028793460019 | 0.5381353330232163 | 0.4596200836449510 | T | T | T |
| 0.7498229600316020 | 0.6844003267016976 | 0.5395347228826958 | T | T | T |
| 0.3805899955332279 | 0.5811638913835608 | 0.0294058438053355 | F | F | F |
| 0.3805899955332279 | 0.7065689027760556 | 0.1121157231293139 | F | F | F |
| 0.3815686875289824 | 0.8308156119982245 | 0.1947588880922774 | T | T | T |
| 0.3814441604645270 | 0.9557617526256250 | 0.2774676317838076 | T | T | T |
| 0.4252732284785230 | 0.6025249556334006 | 0.2165416349444627 | T | T | T |
| 0.4253620878807418 | 0.7276025531658191 | 0.2992841921026013 | T | T | T |
| 0.4259088781196871 | 0.8536509094432722 | 0.3819766279823825 | T | T | T |
| 0.4255415130675611 | 0.9780761921898298 | 0.4656045034072794 | T | T | T |
| 0.3812677047381395 | 0.5809209430700737 | 0.3601962301448801 | T | T | T |
| 0.3810347575953827 | 0.7053644972360571 | 0.4419138933913349 | T | T | T |
| 0.3776615424038761 | 0.8385247256170335 | 0.5268812006391927 | T | T | T |
| 0.4261699933558702 | 0.8522211622490019 | 0.0510568088182595 | F | F | F |
| 0.4261699933558702 | 0.9776261736414895 | 0.1337666881422379 | F | F | F |
| 0.4251100559375184 | 0.6203866951326695 | 0.5473140561148847 | T | T | T |
| 0.8805899955332279 | 0.6631659228764377 | 0.0216509650129240 | F | F | F |
| 0.8805899955332279 | 0.7885709342689324 | 0.1043608443369095 | F | F | F |
| 0.8814490787386038 | 0.9136369080689923 | 0.1870973184288481 | T | T | T |
| 0.9261699933558702 | 0.8921086520110038 | 0.0000000000000000 | F | F | F |
| 0.9245701726737648 | 0.5157155310928692 | 0.4133853272383490 | T | T | T |
| 0.9281192954327511 | 0.6532282569140466 | 0.4946726155382589 | T | T | T |
| 0.8815100201608830 | 0.5384389843136409 | 0.2698014264826740 | T | T | T |
| 0.8814927996307167 | 0.6636036394665590 | 0.3525865566827325 | T | T | T |
| 0.8810785190366764 | 0.7882337641126999 | 0.4348687871689169 | T | T | T |
| 0.8816085909334298 | 0.9216177462990204 | 0.5199811038818251 | T | T | T |
| 0.9261699933558702 | 0.5175136634034985 | 0.0827098793239784 | F | F | F |
| 0.9257524003856392 | 0.6418570741497656 | 0.1654679435837049 | T | T | T |
| 0.9252599420848888 | 0.7667142267037356 | 0.2481212648955464 | T | T | T |
| 0.9246928166575771 | 0.8919852846914950 | 0.3307259349946061 | T | T | T |
| 0.1194100044667721 | 0.5811638913835608 | 0.0294058438053355 | F | F | F |
| 0.1194100044667721 | 0.7065689027760556 | 0.1121157231293139 | F | F | F |
| 0.1182673925372504 | 0.8308378404475920 | 0.1947853690471956 | T | T | T |
| 0.1182114841129697 | 0.9558293581146270 | 0.2775031318099642 | T | T | T |
| 0.0745489098609161 | 0.6025409571462915 | 0.2165436365413804 | T | T | T |
| 0.0744017962032087 | 0.7276848576591577 | 0.2992687975274927 | T | T | T |
| 0.0740362501103014 | 0.8535425600494085 | 0.3818366742874765 | T | T | T |
| 0.0739269471071983 | 0.9771673930001693 | 0.4652752571722997 | T | T | T |
| 0.1183323081323693 | 0.5809801553352006 | 0.3602064886434213 | T | T | T |
| 0.1180872810918633 | 0.7047377320275202 | 0.4417795153640464 | T | T | T |
| 0.1219349416455206 | 0.8390433902839824 | 0.5270386244247895 | T | T | T |
| 0.0738300066441298 | 0.8522211622490019 | 0.0510568088182595 | F | F | F |
| 0.0738300066441298 | 0.9776261736414895 | 0.1337666881422379 | F | F | F |
| 0.0741787302324882 | 0.6209917869066772 | 0.5474218682841629 | T | T | T |
| 0.6194100044667721 | 0.6631659228764377 | 0.0216509650129240 | F | F | F |
| 0.6194100044667721 | 0.7885709342689324 | 0.1043608443369095 | F | F | F |
| 0.6184206186728762 | 0.9136728161839098 | 0.1871220846423092 | T | T | T |
| 0.5738300066441298 | 0.8921086520110038 | 0.0000000000000000 | F | F | F |
| 0.5748336403586857 | 0.5158456712372956 | 0.4134067236063216 | T | T | T |
| 0.5708974552098006 | 0.6527733229184970 | 0.4947387670221380 | T | T | T |
| 0.6182245648956454 | 0.5384466926833393 | 0.2698429774045815 | T | T | T |
| 0.6180148791975546 | 0.6636214822289103 | 0.3526490832339563 | T | T | T |
| 0.6180189959016609 | 0.7884706955062776 | 0.4349535986441611 | T | T | T |

|                    |                    |                    |   |   |   |
|--------------------|--------------------|--------------------|---|---|---|
| 0.6175778668086384 | 0.9219177299804502 | 0.5207474095386599 | T | T | T |
| 0.5738300066441298 | 0.5175136634034985 | 0.0827098793239784 | F | F | F |
| 0.5741543705865160 | 0.6418658751682544 | 0.1654652068863750 | T | T | T |
| 0.5743705346946523 | 0.7666873427199729 | 0.2481214059504754 | T | T | T |
| 0.5743695814402839 | 0.8921149287165522 | 0.3307876512486317 | T | T | T |
| 0.5837647047035456 | 0.2501362358991451 | 0.5843092229864116 | T | T | T |
| 0.2500000000000000 | 0.0746099933052733 | 0.1245949913851589 | F | F | F |
| 0.2499470486089535 | 0.2003011941361209 | 0.2072847130079058 | T | T | T |
| 0.2499668498982262 | 0.3252902001707830 | 0.2899753436560584 | T | T | T |
| 0.2498667509267353 | 0.4496074624362172 | 0.3725340751424324 | T | T | T |
| 0.2500000000000000 | 0.4492049819127857 | 0.0418851120611805 | F | F | F |
| 0.2498981492224495 | 0.0746865740400080 | 0.4544362069103058 | T | T | T |
| 0.2477216438648361 | 0.1948640769305386 | 0.5348724129886606 | T | T | T |
| 0.7500000000000000 | 0.2951248323472200 | 0.0091716967570790 | F | F | F |
| 0.7500000000000000 | 0.4205298437397076 | 0.0918815760810574 | F | F | F |
| 0.7494388576580472 | 0.0453149224146931 | 0.5073671461025230 | T | T | T |
| 0.7499394357149365 | 0.0443995834400016 | 0.1745504644120598 | T | T | T |
| 0.7498484403219950 | 0.1688580363225761 | 0.2573729381895938 | T | T | T |
| 0.7497052628809876 | 0.2935885407998888 | 0.3401804620594778 | T | T | T |
| 0.7495173731773591 | 0.4178656774272942 | 0.4231546621445664 | T | T | T |
| 0.9406099943444133 | 0.0054327150181379 | 0.0365676919062707 | F | F | F |
| 0.9406099943444133 | 0.1308377264106326 | 0.1192775712302492 | F | F | F |
| 0.9392488804774323 | 0.2555315576609467 | 0.2018981024760052 | T | T | T |
| 0.9392430990936323 | 0.3801765340342960 | 0.2845473147834331 | T | T | T |
| 0.9394226223298092 | 0.0044244966198135 | 0.3670319304342166 | T | T | T |
| 0.9403534300336366 | 0.1292773536202964 | 0.4488302306615032 | T | T | T |
| 0.9389158149602784 | 0.2436425697458471 | 0.5302168127055737 | T | T | T |
| 0.4406099943444133 | 0.2388970992418606 | 0.0144891169119887 | F | F | F |
| 0.4406099943444133 | 0.3643021106343554 | 0.0971989962359672 | F | F | F |
| 0.4393443773211954 | 0.4891618750252467 | 0.1800451638361076 | T | T | T |
| 0.4392697472591816 | 0.1140023823844658 | 0.2627805924064004 | T | T | T |
| 0.4392589041447479 | 0.2387142728917317 | 0.3456235678233265 | T | T | T |
| 0.4396041927426286 | 0.3637206500292836 | 0.4286588138970191 | T | T | T |
| 0.4410742691867534 | 0.4910898034935413 | 0.5128720145202892 | T | T | T |
| 0.5593900056555867 | 0.0054327150181379 | 0.0365676919062707 | F | F | F |
| 0.5593900056555867 | 0.1308377264106326 | 0.1192775712302492 | F | F | F |
| 0.5606046175150649 | 0.2555328257238547 | 0.2019025741131872 | T | T | T |
| 0.5604784369268034 | 0.3801335021088554 | 0.2845712842638978 | T | T | T |
| 0.5605378884100831 | 0.0045379510320561 | 0.3673571640045154 | T | T | T |
| 0.5602399830897227 | 0.1290880390469855 | 0.4501763450265686 | T | T | T |
| 0.5570972957122697 | 0.2481861486040356 | 0.5321306281518640 | T | T | T |
| 0.0593900056555867 | 0.2388970992418606 | 0.0144891169119887 | F | F | F |
| 0.0593900056555867 | 0.3643021106343554 | 0.0971989962359672 | F | F | F |
| 0.0605348391281305 | 0.4891508024219778 | 0.1800434200814210 | T | T | T |
| 0.0604707318785457 | 0.1140470268751755 | 0.2627637228906587 | T | T | T |
| 0.0603054147943937 | 0.2389427589438252 | 0.3455550223565779 | T | T | T |
| 0.0604384443036950 | 0.3646454546372797 | 0.4285042193424072 | T | T | T |
| 0.0585135012417064 | 0.4903069135669594 | 0.5131368593593836 | T | T | T |
| 0.2500000000000000 | 0.5746099933052733 | 0.1245949913851589 | F | F | F |
| 0.2499319632732174 | 0.7003090892421228 | 0.2072778233683802 | T | T | T |
| 0.2499240573656586 | 0.8252491398407440 | 0.2899559298440303 | T | T | T |
| 0.2499507060401095 | 0.9495446679779516 | 0.3725062841259292 | T | T | T |
| 0.2500000000000000 | 0.9492049819127857 | 0.0418851120611805 | F | F | F |
| 0.2493284166490808 | 0.5745559248784082 | 0.4544391163864956 | T | T | T |
| 0.2496106868940614 | 0.6956097667708400 | 0.5351062481756825 | T | T | T |
| 0.7500000000000000 | 0.7951248323472200 | 0.0091716967570790 | F | F | F |
| 0.7500000000000000 | 0.9205298437397076 | 0.0918815760810574 | F | F | F |
| 0.7500054516192449 | 0.5442334000389608 | 0.5068294726782568 | T | T | T |

|                    |                    |                    |   |   |   |
|--------------------|--------------------|--------------------|---|---|---|
| 0.7499271724624320 | 0.5443939604874584 | 0.1745502137772121 | T | T | T |
| 0.7497807622007496 | 0.6688938563827324 | 0.2573690820496787 | T | T | T |
| 0.7494332207822453 | 0.7939006629729302 | 0.3401738661381478 | T | T | T |
| 0.7489739020999095 | 0.9190893873130461 | 0.4231972952403001 | T | T | T |
| 0.9406099943444133 | 0.5054327150181379 | 0.0365676919062707 | F | F | F |
| 0.9406099943444133 | 0.6308377264106326 | 0.1192775712302492 | F | F | F |
| 0.9392309980273477 | 0.7555316753562684 | 0.2018982423654414 | T | T | T |
| 0.9392609371469391 | 0.8801579337209231 | 0.2845430570053047 | T | T | T |
| 0.9391600518220056 | 0.5044947555306514 | 0.3670658618873361 | T | T | T |
| 0.9398000266597920 | 0.6295079624430535 | 0.4489123277413590 | T | T | T |
| 0.9381514389790754 | 0.7436979928738741 | 0.5305958604816263 | T | T | T |
| 0.4406099943444133 | 0.7388970992418606 | 0.0144891169119887 | F | F | F |
| 0.4406099943444133 | 0.8643021106343554 | 0.0971989962359672 | F | F | F |
| 0.4393456605435558 | 0.9891659816979849 | 0.1800476907683438 | T | T | T |
| 0.4393060709424231 | 0.6140358613429373 | 0.2627658608281656 | T | T | T |
| 0.4391984176725952 | 0.7391627784124993 | 0.3455879705027383 | T | T | T |
| 0.4389833545076331 | 0.8654454957039384 | 0.4286602309710225 | T | T | T |
| 0.4412458488944091 | 0.9901487271865056 | 0.5134336266278046 | T | T | T |
| 0.5593900056555867 | 0.5054327150181379 | 0.0365676919062707 | F | F | F |
| 0.5593900056555867 | 0.6308377264106326 | 0.1192775712302492 | F | F | F |
| 0.5606015088618260 | 0.7555426893134283 | 0.2019055727273826 | T | T | T |
| 0.5605084689282166 | 0.8801671374969540 | 0.2846065582700932 | T | T | T |
| 0.5602299602124641 | 0.5045673826042499 | 0.3670942189155302 | T | T | T |
| 0.5587788276149928 | 0.6297214290033561 | 0.4488954952218340 | T | T | T |
| 0.5610474296354702 | 0.7438137022530735 | 0.5306731987107420 | T | T | T |
| 0.0593900056555867 | 0.7388970992418606 | 0.0144891169119887 | F | F | F |
| 0.0593900056555867 | 0.8643021106343554 | 0.0971989962359672 | F | F | F |
| 0.0605376147868868 | 0.9891576270457844 | 0.1800447166733412 | T | T | T |
| 0.0604345514836475 | 0.6139966132206561 | 0.2627621188815766 | T | T | T |
| 0.0601389280024584 | 0.7388144162693628 | 0.3455589249281433 | T | T | T |
| 0.0598780636724802 | 0.8644855508401780 | 0.4284867627766173 | T | T | T |
| 0.0578943120967560 | 0.9892861572179481 | 0.5129164730207931 | T | T | T |

(6) [110]<sub>dis</sub>

110-water-dis

|                     |                     |                     |
|---------------------|---------------------|---------------------|
| 1.0000000000000000  |                     |                     |
| 10.3476600646972994 | 0.0000000000000000  | 0.0000000000000000  |
| 0.0000000000000000  | 11.0339593887328995 | 0.0000000000000010  |
| 0.0000000000000000  | 0.0000000000000000  | 44.1809380160793026 |

| H | N   | O | Ta |
|---|-----|---|----|
| 2 | 140 | 1 | 84 |

Selective dynamics

Direct

|                    |                    |                    |   |   |   |
|--------------------|--------------------|--------------------|---|---|---|
| 0.5562780278892000 | 0.3623958983509207 | 0.5890380502926515 | T | T | T |
| 0.4354575426667362 | 0.0866352025057846 | 0.5716400337269124 | T | T | T |
| 0.2500000000000000 | 0.3293039861898137 | 0.0059393964048695 | F | F | F |
| 0.2500000000000000 | 0.4547089975823013 | 0.0886492757288480 | F | F | F |
| 0.2534864841112432 | 0.0971614745075656 | 0.5000494295357808 | T | T | T |
| 0.2499979202232230 | 0.0804240415792366 | 0.1713210952254717 | T | T | T |
| 0.2500557084718013 | 0.2062975118349616 | 0.2539987133270704 | T | T | T |
| 0.2503083635649606 | 0.3317307774077401 | 0.3366557030980096 | T | T | T |
| 0.2498509955186024 | 0.4553270958675257 | 0.4192798525553705 | T | T | T |
| 0.7500000000000000 | 0.0404308394626796 | 0.1278272917373684 | F | F | F |
| 0.7499990189911013 | 0.1640871425183790 | 0.2105918625333337 | T | T | T |
| 0.7500027033358790 | 0.2888281098527341 | 0.2933540678502585 | T | T | T |
| 0.7500849658095803 | 0.4134848420971531 | 0.3762048968160678 | T | T | T |
| 0.7500000000000000 | 0.4150258280701919 | 0.0451174124133900 | F | F | F |
| 0.7491073649204687 | 0.0407588710936982 | 0.4597269099864779 | T | T | T |

|                    |                    |                    |   |   |   |
|--------------------|--------------------|--------------------|---|---|---|
| 0.7578096360424278 | 0.1838020957100195 | 0.5392331744842155 | T | T | T |
| 0.3805899955332279 | 0.0811638913835608 | 0.0294058438053355 | F | F | F |
| 0.3805899955332279 | 0.2065689027760556 | 0.1121157231293139 | F | F | F |
| 0.3816404567026762 | 0.3311138462358860 | 0.1947698439711128 | T | T | T |
| 0.3817036248746695 | 0.4563292614941738 | 0.2774511499011809 | T | T | T |
| 0.4253906434248108 | 0.1028389424064829 | 0.2165552967231985 | T | T | T |
| 0.4256086280160193 | 0.2281362503885053 | 0.2992987485096784 | T | T | T |
| 0.4259240056192895 | 0.3535076174269617 | 0.3820583459613877 | T | T | T |
| 0.4254371523489725 | 0.4785418536125232 | 0.4651837503130948 | T | T | T |
| 0.3813647968082152 | 0.0814988300093341 | 0.3601551800156624 | T | T | T |
| 0.3823803726636645 | 0.2049051157612965 | 0.4418751728749122 | T | T | T |
| 0.3833327949726709 | 0.3351520819142910 | 0.5259137300770410 | T | T | T |
| 0.4261699933558702 | 0.3522211622490019 | 0.0510568088182595 | F | F | F |
| 0.4261699933558702 | 0.4776261736414895 | 0.1337666881422379 | F | F | F |
| 0.4109480737715758 | 0.1084966625859921 | 0.5498875887831873 | T | T | T |
| 0.8805899955332279 | 0.1631659228764377 | 0.0216509650129240 | F | F | F |
| 0.8805899955332279 | 0.2885709342689324 | 0.1043608443369095 | F | F | F |
| 0.8814923472506538 | 0.4139197060859422 | 0.1871073903734067 | T | T | T |
| 0.9261699933558702 | 0.3921086520110038 | 0.0000000000000000 | F | F | F |
| 0.9249451383627717 | 0.0161946457581332 | 0.4134371015685036 | T | T | T |
| 0.9282993245591963 | 0.1526019704216914 | 0.4942550334178258 | T | T | T |
| 0.8816685073813310 | 0.0389135209505128 | 0.2698003757543160 | T | T | T |
| 0.8819750729884200 | 0.1640199980948075 | 0.3524733662522418 | T | T | T |
| 0.8818487100139321 | 0.2885032634325486 | 0.4343495793913069 | T | T | T |
| 0.8811657298510260 | 0.4214003517292854 | 0.5182436414853656 | T | T | T |
| 0.9261699933558702 | 0.0175136634034914 | 0.0827098793239784 | F | F | F |
| 0.9258149475868988 | 0.1420620477456311 | 0.1654646008092959 | T | T | T |
| 0.9254516204270009 | 0.2671669685335258 | 0.2481047988886376 | T | T | T |
| 0.9249508807494057 | 0.3927609596002050 | 0.3306974474296758 | T | T | T |
| 0.1194100044667721 | 0.0811638913835608 | 0.0294058438053355 | F | F | F |
| 0.1194100044667721 | 0.2065689027760556 | 0.1121157231293139 | F | F | F |
| 0.1183461729859393 | 0.3311239577897169 | 0.1947859426162176 | T | T | T |
| 0.1183637198892468 | 0.4564056358102280 | 0.2774915170082305 | T | T | T |
| 0.0746655075582471 | 0.1028398929694887 | 0.2165522583104177 | T | T | T |
| 0.0746287522781597 | 0.2282977906622266 | 0.2992603724488753 | T | T | T |
| 0.0745010122619886 | 0.3542941646433579 | 0.3818155058200497 | T | T | T |
| 0.0748368789463141 | 0.4787287092495630 | 0.4652884575714316 | T | T | T |
| 0.1186747448114958 | 0.0818172951689647 | 0.3602250335799039 | T | T | T |
| 0.1187338848102854 | 0.2062983296950523 | 0.4418345574722641 | T | T | T |
| 0.1224743013011105 | 0.3435717322862855 | 0.5282300262402464 | T | T | T |
| 0.0738300066441298 | 0.3522211622490019 | 0.0510568088182595 | F | F | F |
| 0.0738300066441298 | 0.4776261736414895 | 0.1337666881422379 | F | F | F |
| 0.0737763775154028 | 0.1211274549486540 | 0.5467542902596492 | T | T | T |
| 0.6194100044667721 | 0.1631659228764377 | 0.0216509650129240 | F | F | F |
| 0.6194100044667721 | 0.2885709342689324 | 0.1043608443369095 | F | F | F |
| 0.6184893128804939 | 0.4139477846762410 | 0.1871218894837659 | T | T | T |
| 0.5738300066441298 | 0.3921086520110038 | 0.0000000000000000 | F | F | F |
| 0.5740312641035562 | 0.0181736886021904 | 0.4141094067155287 | T | T | T |
| 0.5702469575316653 | 0.1484154627104308 | 0.4976943941705553 | T | T | T |
| 0.6183469786959673 | 0.0390914045387001 | 0.2699546930631243 | T | T | T |
| 0.6182211592668815 | 0.1646383267343111 | 0.3530173872487801 | T | T | T |
| 0.6185936070923871 | 0.2910348193333295 | 0.4370227292992531 | T | T | T |
| 0.6179049927875006 | 0.4236675001147355 | 0.5203968659376490 | T | T | T |
| 0.5738300066441298 | 0.0175136634034914 | 0.0827098793239784 | F | F | F |
| 0.5741952075063781 | 0.1420830912281175 | 0.1654631045409765 | T | T | T |
| 0.5745784751893042 | 0.2672081165036326 | 0.2481084068732384 | T | T | T |
| 0.5750729042428853 | 0.3927997369943252 | 0.3307299868909755 | T | T | T |
| 0.2500000000000000 | 0.8293039861898137 | 0.0059393964048695 | F | F | F |

|                    |                    |                    |   |   |   |
|--------------------|--------------------|--------------------|---|---|---|
| 0.2500000000000000 | 0.9547089975823013 | 0.0886492757288480 | F | F | F |
| 0.2510909894376927 | 0.5913143590550898 | 0.5004575283646506 | T | T | T |
| 0.2499864080079615 | 0.5804467300504856 | 0.1713227897526916 | T | T | T |
| 0.2500280912683743 | 0.7063255466995372 | 0.2540060944625828 | T | T | T |
| 0.2503493115455252 | 0.8313121128699400 | 0.3366971020464127 | T | T | T |
| 0.2505888774268579 | 0.9546831300336887 | 0.4192668178910857 | T | T | T |
| 0.7500000000000000 | 0.5404308394626796 | 0.1278272917373684 | F | F | F |
| 0.7499567364493650 | 0.6641125040800724 | 0.2106075199471499 | T | T | T |
| 0.7498476640133575 | 0.7891874398684214 | 0.2933941124269654 | T | T | T |
| 0.7494732568322852 | 0.9153387381207051 | 0.3761846929628304 | T | T | T |
| 0.7500000000000000 | 0.9150258280701919 | 0.0451174124133900 | F | F | F |
| 0.7502298233458187 | 0.5403077281490456 | 0.4593255382848347 | T | T | T |
| 0.7504292657394033 | 0.6846435347168600 | 0.5394372163871857 | T | T | T |
| 0.3805899955332279 | 0.5811638913835608 | 0.0294058438053355 | F | F | F |
| 0.3805899955332279 | 0.7065689027760556 | 0.1121157231293139 | F | F | F |
| 0.3816158674678471 | 0.8311067835384066 | 0.1947770326951520 | T | T | T |
| 0.3815773490857053 | 0.9562995623656655 | 0.2774819150326445 | T | T | T |
| 0.4253701381739577 | 0.6028664244131222 | 0.2165481282167164 | T | T | T |
| 0.4256206435627544 | 0.7282592118086770 | 0.2992707467361534 | T | T | T |
| 0.4262900804720245 | 0.8544318266922781 | 0.3819623777266085 | T | T | T |
| 0.4255282891607881 | 0.9787332884618120 | 0.4655593525547920 | T | T | T |
| 0.3817545825248422 | 0.5816179395767063 | 0.3601047425449694 | T | T | T |
| 0.3816220163356626 | 0.7064492959259732 | 0.4417513939324594 | T | T | T |
| 0.3779527923109514 | 0.8344545931511420 | 0.5241845522604498 | T | T | T |
| 0.4261699933558702 | 0.8522211622490019 | 0.0510568088182595 | F | F | F |
| 0.4261699933558702 | 0.9776261736414895 | 0.1337666881422379 | F | F | F |
| 0.4243124552452107 | 0.6201222753464619 | 0.5475777373373092 | T | T | T |
| 0.8805899955332279 | 0.6631659228764377 | 0.0216509650129240 | F | F | F |
| 0.8805899955332279 | 0.7885709342689324 | 0.1043608443369095 | F | F | F |
| 0.8814965557216337 | 0.9139109229811289 | 0.1871106818528909 | T | T | T |
| 0.9261699933558702 | 0.8921086520110038 | 0.0000000000000000 | F | F | F |
| 0.9249807282106353 | 0.5165610802034070 | 0.4132889022359568 | T | T | T |
| 0.9277140686627978 | 0.6540555481557725 | 0.4945192310506523 | T | T | T |
| 0.8815949870193528 | 0.5390192207325226 | 0.2698028321971436 | T | T | T |
| 0.8816282276963994 | 0.6644602187918341 | 0.3525788237948372 | T | T | T |
| 0.8812757710854764 | 0.7896144819492400 | 0.4347617877142491 | T | T | T |
| 0.8813437425947267 | 0.9207355815671066 | 0.5188994000954094 | T | T | T |
| 0.9261699933558702 | 0.5175136634034985 | 0.0827098793239784 | F | F | F |
| 0.9257721906798821 | 0.6421055215274604 | 0.1654685469340620 | T | T | T |
| 0.9253467211056065 | 0.7672774309269456 | 0.2481257331607563 | T | T | T |
| 0.9249292037352760 | 0.8927373775018231 | 0.3307765179679450 | T | T | T |
| 0.1194100044667721 | 0.5811638913835608 | 0.0294058438053355 | F | F | F |
| 0.1194100044667721 | 0.7065689027760556 | 0.1121157231293139 | F | F | F |
| 0.1183277475436037 | 0.8311188144462541 | 0.1947886965532139 | T | T | T |
| 0.1183722591708693 | 0.9563984813106059 | 0.2775237465026566 | T | T | T |
| 0.0746119197152489 | 0.6028636413032215 | 0.2165574189473320 | T | T | T |
| 0.0744740225411191 | 0.7283381930900159 | 0.2992786622842211 | T | T | T |
| 0.0743615081069307 | 0.8543887551435755 | 0.3818833809989132 | T | T | T |
| 0.0758173272886135 | 0.9781901052493062 | 0.4654618044856226 | T | T | T |
| 0.1185344625766164 | 0.5817859372983097 | 0.3601727645929235 | T | T | T |
| 0.1183992738803655 | 0.7062260639045357 | 0.4418766114054827 | T | T | T |
| 0.1224154828880400 | 0.8412170350735220 | 0.5284529229652014 | T | T | T |
| 0.0738300066441298 | 0.8522211622490019 | 0.0510568088182595 | F | F | F |
| 0.0738300066441298 | 0.9776261736414895 | 0.1337666881422379 | F | F | F |
| 0.0737862111888447 | 0.6212854190098887 | 0.5469365957293600 | T | T | T |
| 0.6194100044667721 | 0.6631659228764377 | 0.0216509650129240 | F | F | F |
| 0.6194100044667721 | 0.7885709342689324 | 0.1043608443369095 | F | F | F |
| 0.6184732412880201 | 0.9139529174603293 | 0.1871384790847213 | T | T | T |

|                    |                    |                    |   |   |   |
|--------------------|--------------------|--------------------|---|---|---|
| 0.5738300066441298 | 0.8921086520110038 | 0.0000000000000000 | F | F | F |
| 0.5754637821396742 | 0.5169793375365622 | 0.4132909397956364 | T | T | T |
| 0.5712467517230793 | 0.6514673440301926 | 0.4948249394491481 | T | T | T |
| 0.6184149485095020 | 0.5390601998616518 | 0.2698562727568025 | T | T | T |
| 0.6185032346668020 | 0.6644212976938744 | 0.3526298369329628 | T | T | T |
| 0.6189005699018998 | 0.7896317767822569 | 0.4351270836509814 | T | T | T |
| 0.6171272239752288 | 0.9226380383782543 | 0.5230398887747741 | T | T | T |
| 0.5738300066441298 | 0.5175136634034985 | 0.0827098793239784 | F | F | F |
| 0.5741943740402932 | 0.6421092187767110 | 0.1654683502614961 | T | T | T |
| 0.5744865626916735 | 0.7673039324277948 | 0.2481446098363207 | T | T | T |
| 0.5744659512097356 | 0.8929021841897400 | 0.3309136312661731 | T | T | T |
| 0.5669765416223891 | 0.2831484931983363 | 0.5797701139298084 | T | T | T |
| 0.2500000000000000 | 0.0746099933052733 | 0.1245949913851589 | F | F | F |
| 0.2500454977596919 | 0.2005790662423302 | 0.2072798973876702 | T | T | T |
| 0.2501827919542333 | 0.3258575641376216 | 0.2899315572647394 | T | T | T |
| 0.2501879163168231 | 0.4504217687504204 | 0.3723738224191701 | T | T | T |
| 0.2500000000000000 | 0.4492049819127857 | 0.0418851120611805 | F | F | F |
| 0.2509413273129570 | 0.0761962796265891 | 0.4541344275788833 | T | T | T |
| 0.2436152193699615 | 0.1975532574462785 | 0.5343709211761276 | T | T | T |
| 0.7500000000000000 | 0.2951248323472200 | 0.0091716967570790 | F | F | F |
| 0.7500000000000000 | 0.4205298437397076 | 0.0918815760810574 | F | F | F |
| 0.7459172184953757 | 0.0493862174533772 | 0.5077725742040086 | T | T | T |
| 0.7499734654549802 | 0.0446464608557880 | 0.1745486091574334 | T | T | T |
| 0.7499564386913903 | 0.1693415753505907 | 0.2573700086805597 | T | T | T |
| 0.7499144556118300 | 0.2940501570174979 | 0.3401814756263485 | T | T | T |
| 0.7496805209730989 | 0.4184593647726186 | 0.4230704135136243 | T | T | T |
| 0.9406099943444133 | 0.0054327150181379 | 0.0365676919062707 | F | F | F |
| 0.9406099943444133 | 0.1308377264106326 | 0.1192775712302492 | F | F | F |
| 0.9393034863548116 | 0.2558174275738204 | 0.2018871254880774 | T | T | T |
| 0.9393189962261379 | 0.3807439806256024 | 0.2845072183608560 | T | T | T |
| 0.9397764420266725 | 0.0050847568143008 | 0.3671051453737265 | T | T | T |
| 0.9410698308911249 | 0.130677782382106  | 0.4488167257694296 | T | T | T |
| 0.9378994090816483 | 0.2451944855886843 | 0.5298419441775249 | T | T | T |
| 0.4406099943444133 | 0.2388970992418606 | 0.0144891169119887 | F | F | F |
| 0.4406099943444133 | 0.3643021106343554 | 0.0971989962359672 | F | F | F |
| 0.4394174649630839 | 0.4894351607417630 | 0.1800421154873149 | T | T | T |
| 0.4394534699775255 | 0.1144352740035988 | 0.2627877197244645 | T | T | T |
| 0.4397008195152767 | 0.2390106914787182 | 0.3456120236586928 | T | T | T |
| 0.4409333648941809 | 0.3628843080917679 | 0.4285240930887185 | T | T | T |
| 0.4381083192567817 | 0.4905134514786562 | 0.5119984855203528 | T | T | T |
| 0.5593900056555867 | 0.0054327150181379 | 0.0365676919062707 | F | F | F |
| 0.5593900056555867 | 0.1308377264106326 | 0.1192775712302492 | F | F | F |
| 0.5606781776715783 | 0.2558162974000227 | 0.2018994184242048 | T | T | T |
| 0.5606682746520015 | 0.3807100901546867 | 0.2845546284337855 | T | T | T |
| 0.5611292296867516 | 0.0055968963578884 | 0.3678832501461808 | T | T | T |
| 0.5624269006792459 | 0.1306989822252809 | 0.4523372715034335 | T | T | T |
| 0.5672434860990987 | 0.2620429853638396 | 0.5358864519333570 | T | T | T |
| 0.0593900056555867 | 0.2388970992418606 | 0.0144891169119887 | F | F | F |
| 0.0593900056555867 | 0.3643021106343554 | 0.0971989962359672 | F | F | F |
| 0.0605789557415251 | 0.4894105171831011 | 0.1800485470931885 | T | T | T |
| 0.0605732610345211 | 0.1145477450366195 | 0.2627634595701513 | T | T | T |
| 0.0604878854551192 | 0.2395957420074966 | 0.3455290677015430 | T | T | T |
| 0.0608353428365818 | 0.3660591379378260 | 0.4284064180075526 | T | T | T |
| 0.0578579461897930 | 0.4921378867816216 | 0.5130148368796897 | T | T | T |
| 0.2500000000000000 | 0.5746099933052733 | 0.1245949913851589 | F | F | F |
| 0.2499790263217463 | 0.7005893423965776 | 0.2072713851293445 | T | T | T |
| 0.2500527103861698 | 0.8258006735759805 | 0.2899334524364290 | T | T | T |
| 0.2502760484571197 | 0.9503771829731217 | 0.3724439871722096 | T | T | T |

|                    |                    |                    |   |   |   |
|--------------------|--------------------|--------------------|---|---|---|
| 0.2500000000000000 | 0.9492049819127857 | 0.0418851120611805 | F | F | F |
| 0.2494422422338411 | 0.5755289797042732 | 0.4540257960832657 | T | T | T |
| 0.2501543102085240 | 0.6953032250294924 | 0.5348822474695163 | T | T | T |
| 0.7500000000000000 | 0.7951248323472200 | 0.0091716967570790 | F | F | F |
| 0.7500000000000000 | 0.9205298437397076 | 0.0918815760810574 | F | F | F |
| 0.7519464656770857 | 0.5477204964334724 | 0.5061604200859160 | T | T | T |
| 0.7499520041811462 | 0.5446870490072226 | 0.1745466745134799 | T | T | T |
| 0.7498031481552317 | 0.6695821735462358 | 0.2573697572926500 | T | T | T |
| 0.7492844477518590 | 0.7952014495756575 | 0.3402011568538845 | T | T | T |
| 0.7478185126453336 | 0.9216874877253299 | 0.4233056763540979 | T | T | T |
| 0.9406099943444133 | 0.5054327150181379 | 0.0365676919062707 | F | F | F |
| 0.9406099943444133 | 0.6308377264106326 | 0.1192775712302492 | F | F | F |
| 0.9392915214125305 | 0.7558216283832639 | 0.2018994964722005 | T | T | T |
| 0.9393897798061988 | 0.8806678777022622 | 0.2845601578213061 | T | T | T |
| 0.9393702233547950 | 0.5054168138919943 | 0.3669275134794175 | T | T | T |
| 0.9397685110010110 | 0.6311089713663142 | 0.4485443182667420 | T | T | T |
| 0.9367487007838158 | 0.7454481640348312 | 0.5304517064182632 | T | T | T |
| 0.4406099943444133 | 0.7388970992418606 | 0.0144891169119887 | F | F | F |
| 0.4406099943444133 | 0.8643021106343554 | 0.0971989962359672 | F | F | F |
| 0.4393860680960769 | 0.9894112976428291 | 0.1800491260259823 | T | T | T |
| 0.4394949578806296 | 0.6146545695062721 | 0.2627526463237706 | T | T | T |
| 0.4396172031442997 | 0.7403385839483182 | 0.3455313095456264 | T | T | T |
| 0.4399008176193263 | 0.8674389835380166 | 0.4285277109163524 | T | T | T |
| 0.4439928860764048 | 0.9882313182191436 | 0.5128747648772296 | T | T | T |
| 0.5593900056555867 | 0.5054327150181379 | 0.0365676919062707 | F | F | F |
| 0.5593900056555867 | 0.6308377264106326 | 0.1192775712302492 | F | F | F |
| 0.5606823976616397 | 0.7558491558242728 | 0.2019287506510584 | T | T | T |
| 0.5607442279163831 | 0.8807775706191592 | 0.2847309008958760 | T | T | T |
| 0.5603725727622701 | 0.5055437895538526 | 0.3669942482728865 | T | T | T |
| 0.5585757607094179 | 0.6308352372713633 | 0.4486472209827660 | T | T | T |
| 0.5597579379926492 | 0.7426176181518591 | 0.5308252609603915 | T | T | T |
| 0.0593900056555867 | 0.7388970992418606 | 0.0144891169119887 | F | F | F |
| 0.0593900056555867 | 0.8643021106343554 | 0.0971989962359672 | F | F | F |
| 0.0605931162619348 | 0.9894291942695829 | 0.1800458162237137 | T | T | T |
| 0.0605112052619447 | 0.6145640679858635 | 0.2627726146324649 | T | T | T |
| 0.0602443425197109 | 0.7398017426371468 | 0.3455719645438153 | T | T | T |
| 0.0598449739999349 | 0.8661366619992459 | 0.4285504002497362 | T | T | T |
| 0.0565103240415764 | 0.9885489672258351 | 0.5129814670442617 | T | T | T |

**(7) [110+O<sub>N3</sub>]<sub>mol</sub>**

110-on-water-mol

|                     |                     |                     |
|---------------------|---------------------|---------------------|
| 1.0000000000000000  |                     |                     |
| 10.3476600646972994 | 0.0000000000000000  | 0.0000000000000000  |
| 0.0000000000000000  | 11.0339593887328995 | 0.0000000000000010  |
| 0.0000000000000000  | 0.0000000000000000  | 44.1809380160793026 |

H N O Ta  
2 139 2 84

Selective dynamics

Direct

|                    |                    |                    |   |   |   |
|--------------------|--------------------|--------------------|---|---|---|
| 0.5010909851631896 | 0.1868361356930883 | 0.5842666852152524 | T | T | T |
| 0.6453768178188097 | 0.2221781757659558 | 0.5926261439835012 | T | T | T |
| 0.2500000000000000 | 0.3293039861898137 | 0.0059393964048695 | F | F | F |
| 0.2500000000000000 | 0.4547089975823013 | 0.0886492757288480 | F | F | F |
| 0.2486921471551420 | 0.0951550042120329 | 0.5004642255087000 | T | T | T |
| 0.2499556317603680 | 0.0800123622206920 | 0.1713579069174860 | T | T | T |
| 0.2499340683408022 | 0.2053951763197110 | 0.2541099154859289 | T | T | T |
| 0.2500260792166610 | 0.3307244240621890 | 0.3369052854711653 | T | T | T |
| 0.2499518688081026 | 0.4550933598073821 | 0.4196975020104182 | T | T | T |



|                    |                    |                    |   |   |   |
|--------------------|--------------------|--------------------|---|---|---|
| 0.7500000000000000 | 0.0404308394626796 | 0.1278272917373684 | F | F | F |
| 0.7498873107607666 | 0.1631568071161802 | 0.2106903686920134 | T | T | T |
| 0.7497438264965255 | 0.2877211736958292 | 0.2935707722751554 | T | T | T |
| 0.7495576114949007 | 0.4132649272351336 | 0.3765128951335197 | T | T | T |
| 0.7500000000000000 | 0.4150258280701919 | 0.0451174124133900 | F | F | F |
| 0.7508121494639921 | 0.0391021064212475 | 0.4600173982833349 | T | T | T |
| 0.7556620989039825 | 0.1858119491145832 | 0.5404062479071128 | T | T | T |
| 0.3805899955332279 | 0.0811638913835608 | 0.0294058438053355 | F | F | F |
| 0.3805899955332279 | 0.2065689027760556 | 0.1121157231293139 | F | F | F |
| 0.3816299369335281 | 0.3303952977903704 | 0.1948021846896461 | T | T | T |
| 0.3815693228677969 | 0.4552436006790695 | 0.2775878003388134 | T | T | T |
| 0.4252339127545909 | 0.1020325952479651 | 0.2166261831900450 | T | T | T |
| 0.4252488952227401 | 0.2269785835652018 | 0.2994840422690689 | T | T | T |
| 0.4254042861961103 | 0.3528111524595116 | 0.3823559513442314 | T | T | T |
| 0.4237392626313493 | 0.4773290396442352 | 0.4662052803031526 | T | T | T |
| 0.3814872986760239 | 0.0805703160798003 | 0.3604053246793142 | T | T | T |
| 0.3818807336181292 | 0.2059764822136457 | 0.4425160887945008 | T | T | T |
| 0.4261699933558702 | 0.3522211622490019 | 0.0510568088182595 | F | F | F |
| 0.4261699933558702 | 0.4776261736414895 | 0.1337666881422379 | F | F | F |
| 0.4218430158704121 | 0.1253194456066355 | 0.5472220210839263 | T | T | T |
| 0.8805899955332279 | 0.1631659228764377 | 0.0216509650129240 | F | F | F |
| 0.8805899955332279 | 0.2885709342689324 | 0.1043608443369095 | F | F | F |
| 0.8814377378306648 | 0.4132361456889269 | 0.1871089258126057 | T | T | T |
| 0.9261699933558702 | 0.3921086520110038 | 0.0000000000000000 | F | F | F |
| 0.9250493556509473 | 0.0161919369999066 | 0.4135404127093809 | T | T | T |
| 0.9303840811705707 | 0.1553737501134709 | 0.4947911709222672 | T | T | T |
| 0.8814831352987151 | 0.0379496220736917 | 0.2699008295240581 | T | T | T |
| 0.8816494537831946 | 0.1633398066141441 | 0.3526417794781916 | T | T | T |
| 0.8815856529596307 | 0.2894813988325516 | 0.4351115997229966 | T | T | T |
| 0.8843499838518295 | 0.4235776578954163 | 0.5206031706672428 | T | T | T |
| 0.9261699933558702 | 0.0175136634034914 | 0.0827098793239784 | F | F | F |
| 0.9256933961233691 | 0.1415507976565399 | 0.1655182294886214 | T | T | T |
| 0.9252685505054431 | 0.2661644147043359 | 0.2482471298523600 | T | T | T |
| 0.9249234040077189 | 0.3916455911545213 | 0.3309639707723065 | T | T | T |
| 0.1194100044667721 | 0.0811638913835608 | 0.0294058438053355 | F | F | F |
| 0.1194100044667721 | 0.2065689027760556 | 0.1121157231293139 | F | F | F |
| 0.1182143108877634 | 0.3304335277419616 | 0.1948295178421731 | T | T | T |
| 0.1181290002613390 | 0.4552468628217726 | 0.2775818723869386 | T | T | T |
| 0.0746148727067565 | 0.1020682774457666 | 0.2166167629611662 | T | T | T |
| 0.0745680644709734 | 0.2271401058737823 | 0.2994330126507115 | T | T | T |
| 0.0744158269432541 | 0.3533280741147491 | 0.3821720433556128 | T | T | T |
| 0.0746404391270404 | 0.4792913223310610 | 0.4657487937376452 | T | T | T |
| 0.1184393815134963 | 0.0807136464382224 | 0.3603217006344878 | T | T | T |
| 0.1186076462095818 | 0.2056769174508876 | 0.4417242014729644 | T | T | T |
| 0.1273054093236843 | 0.3411884162798705 | 0.5255330938917634 | T | T | T |
| 0.0738300066441298 | 0.3522211622490019 | 0.0510568088182595 | F | F | F |
| 0.0738300066441298 | 0.4776261736414895 | 0.1337666881422379 | F | F | F |
| 0.0773768552581235 | 0.1237135575255928 | 0.5477121732505852 | T | T | T |
| 0.6194100044667721 | 0.1631659228764377 | 0.0216509650129240 | F | F | F |
| 0.6194100044667721 | 0.2885709342689324 | 0.1043608443369095 | F | F | F |
| 0.6184489824197957 | 0.4132503181209016 | 0.1871430263933278 | T | T | T |
| 0.5738300066441298 | 0.3921086520110038 | 0.0000000000000000 | F | F | F |
| 0.5744347269847978 | 0.0165053466818082 | 0.4141152677024164 | T | T | T |
| 0.5741159509171488 | 0.1554525161473921 | 0.4960171240102085 | T | T | T |
| 0.6182586727820358 | 0.0379251071202476 | 0.2699491269164230 | T | T | T |
| 0.6181729790062758 | 0.1634132087958001 | 0.3529532454940949 | T | T | T |
| 0.6183457511938220 | 0.2892706685820473 | 0.4355387944491045 | T | T | T |
| 0.6169134166762603 | 0.4215226309073506 | 0.5195402442072965 | T | T | T |

|                    |                    |                    |   |   |   |
|--------------------|--------------------|--------------------|---|---|---|
| 0.5738300066441298 | 0.0175136634034914 | 0.0827098793239784 | F | F | F |
| 0.5741907852960204 | 0.1415278740466015 | 0.1655190231070192 | T | T | T |
| 0.5743704152241281 | 0.2661330976017706 | 0.2482528014194486 | T | T | T |
| 0.5744695789833412 | 0.3916540350855875 | 0.3309977864844901 | T | T | T |
| 0.2500000000000000 | 0.8293039861898137 | 0.0059393964048695 | F | F | F |
| 0.2500000000000000 | 0.9547089975823013 | 0.0886492757288480 | F | F | F |
| 0.2508831665271540 | 0.5949902055881452 | 0.5008996159686903 | T | T | T |
| 0.2499654093494680 | 0.5800144986939654 | 0.1713537385772561 | T | T | T |
| 0.2499796387725044 | 0.7054064733099411 | 0.2541001448888406 | T | T | T |
| 0.2501974018824334 | 0.8306188376109047 | 0.3369175367481774 | T | T | T |
| 0.2504463881403551 | 0.9540686805041184 | 0.4197283537154421 | T | T | T |
| 0.7500000000000000 | 0.5404308394626796 | 0.1278272917373684 | F | F | F |
| 0.7498653054509544 | 0.6631541665654065 | 0.2106875733530283 | T | T | T |
| 0.7496678650451666 | 0.7878289762231427 | 0.2935388919217137 | T | T | T |
| 0.7494849916257703 | 0.9135255000445218 | 0.3764087901741067 | T | T | T |
| 0.7500000000000000 | 0.9150258280701919 | 0.0451174124133900 | F | F | F |
| 0.7505338916053284 | 0.5400521959551002 | 0.4601794825476578 | T | T | T |
| 0.7505471989087129 | 0.6877812311414112 | 0.5395193376506678 | T | T | T |
| 0.3805899955332279 | 0.5811638913835608 | 0.0294058438053355 | F | F | F |
| 0.3805899955332279 | 0.7065689027760556 | 0.1121157231293139 | F | F | F |
| 0.3816257955045770 | 0.8304017602628376 | 0.1947959577211546 | T | T | T |
| 0.3815424647076435 | 0.9552330033535876 | 0.2775793225926577 | T | T | T |
| 0.4252352694584018 | 0.6020217508195962 | 0.2166217176446505 | T | T | T |
| 0.4252844377569346 | 0.7270066629381756 | 0.2994748366486643 | T | T | T |
| 0.4258581035923243 | 0.8531257255391176 | 0.3824026128568208 | T | T | T |
| 0.4252729322373557 | 0.9795822965734448 | 0.4661140873161358 | T | T | T |
| 0.3815451769799559 | 0.5807277350672603 | 0.3604122096897073 | T | T | T |
| 0.3821276874111441 | 0.7061821809033456 | 0.4426860046150048 | T | T | T |
| 0.3799642099797311 | 0.8434142542046905 | 0.5286371269287925 | T | T | T |
| 0.4261699933558702 | 0.8522211622490019 | 0.0510568088182595 | F | F | F |
| 0.4261699933558702 | 0.9776261736414895 | 0.1337666881422379 | F | F | F |
| 0.4263386004458429 | 0.6227487733372076 | 0.5473233088104054 | T | T | T |
| 0.8805899955332279 | 0.6631659228764377 | 0.0216509650129240 | F | F | F |
| 0.8805899955332279 | 0.7885709342689324 | 0.1043608443369095 | F | F | F |
| 0.8814310211586770 | 0.9132371948171030 | 0.1871142316693439 | T | T | T |
| 0.9261699933558702 | 0.8921086520110038 | 0.0000000000000000 | F | F | F |
| 0.9249864353681752 | 0.5164442459863607 | 0.4136463664748559 | T | T | T |
| 0.9301229049713173 | 0.6533308516581262 | 0.4951177019431563 | T | T | T |
| 0.8814736593599275 | 0.5379535729259339 | 0.2699108000810773 | T | T | T |
| 0.8814925908183947 | 0.6634523592051111 | 0.3527189118935266 | T | T | T |
| 0.8813726312725810 | 0.7892690438991151 | 0.4352075336150556 | T | T | T |
| 0.8835013952593338 | 0.9244195689339063 | 0.5204680350966447 | T | T | T |
| 0.9261699933558702 | 0.5175136634034985 | 0.0827098793239784 | F | F | F |
| 0.9256753206547094 | 0.6415423530582389 | 0.1655199004426220 | T | T | T |
| 0.9252615890523754 | 0.7661529344122223 | 0.2482389088686164 | T | T | T |
| 0.9249917824388774 | 0.8914980294914387 | 0.3309269919562038 | T | T | T |
| 0.1194100044667721 | 0.5811638913835608 | 0.0294058438053355 | F | F | F |
| 0.1194100044667721 | 0.7065689027760556 | 0.1121157231293139 | F | F | F |
| 0.1182096398073207 | 0.8304312865203670 | 0.1948245546040689 | T | T | T |
| 0.1181712351766561 | 0.9552707431710883 | 0.2775731446556234 | T | T | T |
| 0.0746602817532910 | 0.6020393179927818 | 0.2166192672731252 | T | T | T |
| 0.0746734933099848 | 0.7271016535505592 | 0.2994231062081985 | T | T | T |
| 0.0745292605887380 | 0.8532778076331823 | 0.3821261318152788 | T | T | T |
| 0.0741043057136412 | 0.9787479431653248 | 0.4655073115361110 | T | T | T |
| 0.1182192579187205 | 0.5806542656514970 | 0.3602751915127298 | T | T | T |
| 0.1183168870702959 | 0.7056025947812103 | 0.4418692921564894 | T | T | T |
| 0.1237455426718406 | 0.8401604259768257 | 0.5257214975749654 | T | T | T |
| 0.0738300066441298 | 0.8522211622490019 | 0.0510568088182595 | F | F | F |

|                    |                    |                    |   |   |   |
|--------------------|--------------------|--------------------|---|---|---|
| 0.0738300066441298 | 0.9776261736414895 | 0.1337666881422379 | F | F | F |
| 0.0756622394463208 | 0.6244819135070621 | 0.5478105723343774 | T | T | T |
| 0.6194100044667721 | 0.6631659228764377 | 0.0216509650129240 | F | F | F |
| 0.6194100044667721 | 0.7885709342689324 | 0.1043608443369095 | F | F | F |
| 0.6184516459738298 | 0.9132732772894868 | 0.1871484554088121 | T | T | T |
| 0.5738300066441298 | 0.8921086520110038 | 0.0000000000000000 | F | F | F |
| 0.5743485312849991 | 0.5167321548318814 | 0.4138404335694484 | T | T | T |
| 0.5686993224120781 | 0.6487182254176027 | 0.4956155460121856 | T | T | T |
| 0.6182655271823482 | 0.5378807993153327 | 0.2699168474664630 | T | T | T |
| 0.6182512038408572 | 0.6632930068145495 | 0.3527570442788855 | T | T | T |
| 0.6189582852425600 | 0.7887707857006427 | 0.4354079812153809 | T | T | T |
| 0.6189997357064608 | 0.9227285007761731 | 0.5197008706540782 | T | T | T |
| 0.5738300066441298 | 0.5175136634034985 | 0.0827098793239784 | F | F | F |
| 0.5741871304732317 | 0.6415362260944263 | 0.1655167634601924 | T | T | T |
| 0.5743496494939164 | 0.7661663342315459 | 0.2482481074510867 | T | T | T |
| 0.5743108133629752 | 0.8917600314643710 | 0.3310327130753272 | T | T | T |
| 0.3838681603647277 | 0.3458917892793442 | 0.5294065867550231 | T | T | T |
| 0.5634629714140753 | 0.2556583945640108 | 0.5854743791205971 | T | T | T |
| 0.2500000000000000 | 0.0746099933052733 | 0.1245949913851589 | F | F | F |
| 0.2499632176519745 | 0.1998142129263032 | 0.2072103728793148 | T | T | T |
| 0.2499866464626563 | 0.3246435766575390 | 0.2898508149473779 | T | T | T |
| 0.2500466495142661 | 0.4494022392889575 | 0.3723539749881702 | T | T | T |
| 0.2500000000000000 | 0.4492049819127857 | 0.0418851120611805 | F | F | F |
| 0.2504016007592478 | 0.0752642636199729 | 0.4542707927434585 | T | T | T |
| 0.2452115312693588 | 0.1975294567622332 | 0.5347626279304559 | T | T | T |
| 0.7500000000000000 | 0.2951248323472200 | 0.0091716967570790 | F | F | F |
| 0.7500000000000000 | 0.4205298437397076 | 0.0918815760810574 | F | F | F |
| 0.7512330700825975 | 0.0452194117223657 | 0.5065192074616680 | T | T | T |
| 0.7499404832719377 | 0.0441346547579005 | 0.1744848200832675 | T | T | T |
| 0.7498286814807458 | 0.1684270999790446 | 0.2572787923354082 | T | T | T |
| 0.7497590962470182 | 0.2934799312612858 | 0.3400336990356928 | T | T | T |
| 0.7496062024751262 | 0.4188917451752683 | 0.4229325695478844 | T | T | T |
| 0.9406099943444133 | 0.0054327150181379 | 0.0365676919062707 | F | F | F |
| 0.9406099943444133 | 0.1308377264106326 | 0.1192775712302492 | F | F | F |
| 0.9392585197042047 | 0.2552116001596360 | 0.2019187369436305 | T | T | T |
| 0.9392269167015629 | 0.3797892450291215 | 0.2845744339138647 | T | T | T |
| 0.9396777616760751 | 0.0046685154112306 | 0.3669904681970076 | T | T | T |
| 0.9406361354615305 | 0.1307477495253316 | 0.4487947328719304 | T | T | T |
| 0.9405541274488686 | 0.2459663353510708 | 0.5305445431867976 | T | T | T |
| 0.4406099943444133 | 0.2388970992418606 | 0.0144891169119887 | F | F | F |
| 0.4406099943444133 | 0.3643021106343554 | 0.0971989962359672 | F | F | F |
| 0.4394143462669036 | 0.4889432944062871 | 0.1800400233083828 | T | T | T |
| 0.4392209177551763 | 0.1137894796795998 | 0.2627836573138434 | T | T | T |
| 0.4392843439765725 | 0.2389213266464588 | 0.3456166718427990 | T | T | T |
| 0.4394420870869119 | 0.3650423335572383 | 0.4285803687936486 | T | T | T |
| 0.4426192441871309 | 0.4982396008476591 | 0.5126210026468641 | T | T | T |
| 0.5593900056555867 | 0.0054327150181379 | 0.0365676919062707 | F | F | F |
| 0.5593900056555867 | 0.1308377264106326 | 0.1192775712302492 | F | F | F |
| 0.5605788940131338 | 0.2551843598378805 | 0.2019272367798248 | T | T | T |
| 0.5604454176609333 | 0.3797339665028066 | 0.2845988992950086 | T | T | T |
| 0.5606386026958941 | 0.0044435012343590 | 0.3673529229408418 | T | T | T |
| 0.5603305465587924 | 0.1302224627468665 | 0.4500036069653830 | T | T | T |
| 0.5739616602830359 | 0.2480806307046981 | 0.5323720034355299 | T | T | T |
| 0.0593900056555867 | 0.2388970992418606 | 0.0144891169119887 | F | F | F |
| 0.0593900056555867 | 0.3643021106343554 | 0.0971989962359672 | F | F | F |
| 0.0605005721376317 | 0.4889328101657205 | 0.1800365925197081 | T | T | T |
| 0.0605758610800008 | 0.1138177711437040 | 0.2627527822864089 | T | T | T |
| 0.0606522324594082 | 0.2390648611141953 | 0.3454994661766583 | T | T | T |

|                    |                    |                    |   |   |   |
|--------------------|--------------------|--------------------|---|---|---|
| 0.0609330446051110 | 0.3657625871760583 | 0.4282948789173635 | T | T | T |
| 0.0602002395199759 | 0.4935765017947735 | 0.5126561365869642 | T | T | T |
| 0.2500000000000000 | 0.5746099933052733 | 0.1245949913851589 | F | F | F |
| 0.2499766321524764 | 0.6998009156208718 | 0.2071950387918178 | T | T | T |
| 0.2500593568089194 | 0.8245758590222969 | 0.2898278652848075 | T | T | T |
| 0.2504402453415029 | 0.9491425411909308 | 0.3723814292288050 | T | T | T |
| 0.2500000000000000 | 0.9492049819127857 | 0.0418851120611805 | F | F | F |
| 0.2490462960435237 | 0.5755743715591547 | 0.4542961481918848 | T | T | T |
| 0.2495400491330242 | 0.6989463849259887 | 0.5352881848816267 | T | T | T |
| 0.7500000000000000 | 0.7951248323472200 | 0.0091716967570790 | F | F | F |
| 0.7500000000000000 | 0.9205298437397076 | 0.0918815760810574 | F | F | F |
| 0.7522602943606120 | 0.5462362663934469 | 0.5068497220963282 | T | T | T |
| 0.7499208576068278 | 0.5441238931706995 | 0.1744811145090156 | T | T | T |
| 0.7497806535743449 | 0.6684109628687217 | 0.2572594992716177 | T | T | T |
| 0.7496184870367665 | 0.7936370741854758 | 0.3399671403859245 | T | T | T |
| 0.7496821810901471 | 0.9193781244763710 | 0.4228142164746284 | T | T | T |
| 0.9406099943444133 | 0.5054327150181379 | 0.0365676919062707 | F | F | F |
| 0.9406099943444133 | 0.6308377264106326 | 0.1192775712302492 | F | F | F |
| 0.9392904427038328 | 0.7552244898221631 | 0.2019114860304682 | T | T | T |
| 0.9393502837796243 | 0.8798339961192760 | 0.2845386793255731 | T | T | T |
| 0.9393135846525863 | 0.5047027367697794 | 0.3670511548914024 | T | T | T |
| 0.9397393678438091 | 0.6303311451829109 | 0.4489313622715119 | T | T | T |
| 0.9396040933875358 | 0.7459612790912197 | 0.5307618085888304 | T | T | T |
| 0.4406099943444133 | 0.7388970992418606 | 0.0144891169119887 | F | F | F |
| 0.4406099943444133 | 0.8643021106343554 | 0.0971989962359672 | F | F | F |
| 0.4393871924120556 | 0.9889759641434039 | 0.1800398227905755 | T | T | T |
| 0.4392267193645773 | 0.6138055481972426 | 0.2627727957809313 | T | T | T |
| 0.4392032619199397 | 0.7393552724584452 | 0.3456056785193613 | T | T | T |
| 0.4390227107714962 | 0.8665873361017675 | 0.4287863311663001 | T | T | T |
| 0.4418345925097652 | 0.9941090237129214 | 0.5136554561819424 | T | T | T |
| 0.5593900056555867 | 0.5054327150181379 | 0.0365676919062707 | F | F | F |
| 0.5593900056555867 | 0.6308377264106326 | 0.1192775712302492 | F | F | F |
| 0.5605757154222966 | 0.7552224221031664 | 0.2019215176414215 | T | T | T |
| 0.5604788222829521 | 0.8797609044934432 | 0.2846145944437474 | T | T | T |
| 0.5604272348065519 | 0.5046232935068369 | 0.3671258879832977 | T | T | T |
| 0.5597361120936257 | 0.6307065757914871 | 0.4490077466290087 | T | T | T |
| 0.5623274380782387 | 0.7465821993569965 | 0.5308564827147590 | T | T | T |
| 0.0593900056555867 | 0.7388970992418606 | 0.0144891169119887 | F | F | F |
| 0.0593900056555867 | 0.8643021106343554 | 0.0971989962359672 | F | F | F |
| 0.0605090061195972 | 0.9889624298231317 | 0.1800337190986760 | T | T | T |
| 0.0605204081359954 | 0.6137353015243119 | 0.2627516839406227 | T | T | T |
| 0.0604046628188284 | 0.7390625802229999 | 0.3454775875997975 | T | T | T |
| 0.0602013699549228 | 0.8654101657631269 | 0.4282522098738284 | T | T | T |
| 0.0600203314784579 | 0.9913478825837584 | 0.5122277945955713 | T | T | T |

**(8) [110+O<sub>N3</sub>]<sub>dis</sub>**

110-on-water-dis

|                     |                     |                     |
|---------------------|---------------------|---------------------|
| 1.0000000000000000  |                     |                     |
| 10.3476600646972994 | 0.0000000000000000  | 0.0000000000000000  |
| 0.0000000000000000  | 11.0339593887328995 | 0.0000000000000010  |
| 0.0000000000000000  | 0.0000000000000000  | 44.1809380160793026 |

H N O Ta  
2 139 2 84

Selective dynamics

Direct

|                    |                    |                    |   |   |   |
|--------------------|--------------------|--------------------|---|---|---|
| 0.5354998661852012 | 0.3747150093350051 | 0.5883748608714030 | T | T | T |
| 0.4343913730758849 | 0.0927324672058604 | 0.5708357376529228 | T | T | T |
| 0.2500000000000000 | 0.3293039861898137 | 0.0059393964048695 | F | F | F |

|                    |                    |                    |   |   |   |
|--------------------|--------------------|--------------------|---|---|---|
| 0.2500000000000000 | 0.4547089975823013 | 0.0886492757288480 | F | F | F |
| 0.2526860565000713 | 0.0979436166524543 | 0.5003733486345531 | T | T | T |
| 0.2499413533565511 | 0.0801992548063660 | 0.1713579416872016 | T | T | T |
| 0.2499318490012019 | 0.2058738048031121 | 0.2540893435491161 | T | T | T |
| 0.2500849715186227 | 0.3313576247108996 | 0.3368707685052844 | T | T | T |
| 0.2496821553281960 | 0.4554761716245648 | 0.4196038556526513 | T | T | T |
| 0.7500000000000000 | 0.0404308394626796 | 0.1278272917373684 | F | F | F |
| 0.7498510197798217 | 0.1636325948162420 | 0.2106716173225064 | T | T | T |
| 0.7496406797191133 | 0.2883630101355937 | 0.2935437224462401 | T | T | T |
| 0.7494199409794632 | 0.4137418814545287 | 0.3765093092210384 | T | T | T |
| 0.7500000000000000 | 0.4150258280701919 | 0.0451174124133900 | F | F | F |
| 0.7507422327561105 | 0.0406342907150706 | 0.4601292549110565 | T | T | T |
| 0.7591948653540086 | 0.1840149465711732 | 0.5403149950981465 | T | T | T |
| 0.3805899955332279 | 0.0811638913835608 | 0.0294058438053355 | F | F | F |
| 0.3805899955332279 | 0.2065689027760556 | 0.1121157231293139 | F | F | F |
| 0.3815928786890961 | 0.3307091162849800 | 0.1947829329697691 | T | T | T |
| 0.3815419908140215 | 0.4557614625842795 | 0.2775439288510742 | T | T | T |
| 0.4252267701243393 | 0.1024182354607450 | 0.2166160825624172 | T | T | T |
| 0.4252461735698090 | 0.2275408477429029 | 0.2994737140637415 | T | T | T |
| 0.4253897964925126 | 0.3531981573299283 | 0.3823772729415257 | T | T | T |
| 0.4235682634302271 | 0.4786637430622203 | 0.4657250561699150 | T | T | T |
| 0.3813894602015415 | 0.0813412823298068 | 0.3604496235484382 | T | T | T |
| 0.3825268035077132 | 0.2059128077387400 | 0.4427139606468348 | T | T | T |
| 0.4261699933558702 | 0.3522211622490019 | 0.0510568088182595 | F | F | F |
| 0.4261699933558702 | 0.4776261736414895 | 0.1337666881422379 | F | F | F |
| 0.4209572952114249 | 0.1207169164066188 | 0.5489400569052337 | T | T | T |
| 0.8805899955332279 | 0.1631659228764377 | 0.0216509650129240 | F | F | F |
| 0.8805899955332279 | 0.2885709342689324 | 0.1043608443369095 | F | F | F |
| 0.8814151125817129 | 0.4135533308842803 | 0.1871166045313603 | T | T | T |
| 0.9261699933558702 | 0.3921086520110038 | 0.0000000000000000 | F | F | F |
| 0.9245234192153540 | 0.0169803404109351 | 0.4135719248070087 | T | T | T |
| 0.9297336568827469 | 0.1551768100517263 | 0.4946396894992777 | T | T | T |
| 0.8813985202748230 | 0.0384957311397434 | 0.2698773756402771 | T | T | T |
| 0.8814858743988692 | 0.1639268020923176 | 0.3525553336202702 | T | T | T |
| 0.8813323578282861 | 0.2898463388874857 | 0.4347432829621047 | T | T | T |
| 0.8838368455058025 | 0.4232897582843179 | 0.5197693626027133 | T | T | T |
| 0.9261699933558702 | 0.0175136634034914 | 0.0827098793239784 | F | F | F |
| 0.9257288689799245 | 0.1417271973697998 | 0.1655162795955596 | T | T | T |
| 0.9252888787960588 | 0.2666199807541981 | 0.2482307957920833 | T | T | T |
| 0.9248440127847598 | 0.3921941160660496 | 0.3309347424533117 | T | T | T |
| 0.1194100044667721 | 0.0811638913835608 | 0.0294058438053355 | F | F | F |
| 0.1194100044667721 | 0.2065689027760556 | 0.1121157231293139 | F | F | F |
| 0.1182001566311102 | 0.3307643223811392 | 0.1948263170566165 | T | T | T |
| 0.1180725533777354 | 0.4558621767858835 | 0.2775975963987983 | T | T | T |
| 0.0746086244394865 | 0.1024457908147028 | 0.2166102447591556 | T | T | T |
| 0.0745685159407765 | 0.2278086646302377 | 0.2993884909552676 | T | T | T |
| 0.0743646667262083 | 0.3539864439530510 | 0.3820752424586033 | T | T | T |
| 0.0744907000647581 | 0.4799778132670801 | 0.4656318792016544 | T | T | T |
| 0.1181880187520739 | 0.0815184400146576 | 0.3603196478465576 | T | T | T |
| 0.1184761594517749 | 0.2068385971106186 | 0.4417681866652114 | T | T | T |
| 0.1259521615109605 | 0.3427937105238330 | 0.5260186837509836 | T | T | T |
| 0.0738300066441298 | 0.3522211622490019 | 0.0510568088182595 | F | F | F |
| 0.0738300066441298 | 0.4776261736414895 | 0.1337666881422379 | F | F | F |
| 0.0771897495573266 | 0.1231919641214413 | 0.5473695394840741 | T | T | T |
| 0.6194100044667721 | 0.1631659228764377 | 0.0216509650129240 | F | F | F |
| 0.6194100044667721 | 0.2885709342689324 | 0.1043608443369095 | F | F | F |
| 0.6184211476247884 | 0.4135783310351168 | 0.1871504117336416 | T | T | T |
| 0.5738300066441298 | 0.3921086520110038 | 0.0000000000000000 | F | F | F |

|                    |                    |                    |   |   |   |
|--------------------|--------------------|--------------------|---|---|---|
| 0.5738121288030184 | 0.0182790531405316 | 0.4147301748343821 | T | T | T |
| 0.5723100947232608 | 0.1504503426131990 | 0.4978725151688167 | T | T | T |
| 0.6182191606399629 | 0.0385928943825638 | 0.2699985637079370 | T | T | T |
| 0.6180966499165967 | 0.1643736469982461 | 0.3532102446464127 | T | T | T |
| 0.6184664372312270 | 0.2911753973630663 | 0.4368670637659616 | T | T | T |
| 0.6172558093209273 | 0.4208440950865933 | 0.5189822856052548 | T | T | T |
| 0.5738300066441298 | 0.0175136634034914 | 0.0827098793239784 | F | F | F |
| 0.5741311307053183 | 0.1417185354181311 | 0.1655122964612313 | T | T | T |
| 0.5742453544879976 | 0.2666150578143522 | 0.2482339392024470 | T | T | T |
| 0.5742547788520780 | 0.3921825376045399 | 0.3309800308295971 | T | T | T |
| 0.2500000000000000 | 0.8293039861898137 | 0.0059393964048695 | F | F | F |
| 0.2500000000000000 | 0.9547089975823013 | 0.0886492757288480 | F | F | F |
| 0.2508558465931133 | 0.5945974780518456 | 0.5006482815707735 | T | T | T |
| 0.2499365917596984 | 0.5803288797334889 | 0.1713675789790380 | T | T | T |
| 0.2499450657886579 | 0.7060507927069941 | 0.2541292007058659 | T | T | T |
| 0.2502042245450879 | 0.8312482808747947 | 0.3369371793456987 | T | T | T |
| 0.2505621705609348 | 0.9552877863866720 | 0.4195967914498789 | T | T | T |
| 0.7500000000000000 | 0.5404308394626796 | 0.1278272917373684 | F | F | F |
| 0.7498205885586463 | 0.6634672665278891 | 0.2107206055169107 | T | T | T |
| 0.7494369061782065 | 0.7884197737409547 | 0.2936121159665521 | T | T | T |
| 0.7488666183272132 | 0.9145810098674280 | 0.3765493533812503 | T | T | T |
| 0.7500000000000000 | 0.9150258280701919 | 0.0451174124133900 | F | F | F |
| 0.7503286595918399 | 0.5415361628784724 | 0.4598623284862534 | T | T | T |
| 0.7505895568736209 | 0.6866941635713593 | 0.5397434305375846 | T | T | T |
| 0.3805899955332279 | 0.5811638913835608 | 0.0294058438053355 | F | F | F |
| 0.3805899955332279 | 0.7065689027760556 | 0.1121157231293139 | F | F | F |
| 0.3816029708744708 | 0.8307229613367808 | 0.1948115478403822 | T | T | T |
| 0.3814817683583129 | 0.9558328930566218 | 0.2775991734790035 | T | T | T |
| 0.4252035537142293 | 0.6023784103577348 | 0.2166487181322150 | T | T | T |
| 0.4253510128188810 | 0.7276909322475762 | 0.2995005859300528 | T | T | T |
| 0.4259523922195751 | 0.8539972399245596 | 0.3823831933831773 | T | T | T |
| 0.4235647951531776 | 0.9775466881028221 | 0.4663748674570793 | T | T | T |
| 0.3815701053210175 | 0.5812889368883213 | 0.3603129943179617 | T | T | T |
| 0.3819483352701249 | 0.7068556170339627 | 0.4423583651653767 | T | T | T |
| 0.3814030145024571 | 0.8427071203781702 | 0.5300196927024385 | T | T | T |
| 0.4261699933558702 | 0.8522211622490019 | 0.0510568088182595 | F | F | F |
| 0.4261699933558702 | 0.9776261736414895 | 0.1337666881422379 | F | F | F |
| 0.4255850528863726 | 0.6183036868477680 | 0.5471197936904064 | T | T | T |
| 0.8805899955332279 | 0.6631659228764377 | 0.0216509650129240 | F | F | F |
| 0.8805899955332279 | 0.7885709342689324 | 0.1043608443369095 | F | F | F |
| 0.8813824973686540 | 0.9135333767985785 | 0.1871150993329309 | T | T | T |
| 0.9261699933558702 | 0.8921086520110038 | 0.0000000000000000 | F | F | F |
| 0.9250446802023899 | 0.5170708516153977 | 0.4135982917759947 | T | T | T |
| 0.9293270904622433 | 0.6535212386372922 | 0.4951020827620218 | T | T | T |
| 0.8813997895041086 | 0.5385461311648866 | 0.2699086188033699 | T | T | T |
| 0.8812706338535187 | 0.6642164881759497 | 0.3527224660759757 | T | T | T |
| 0.8809885575903263 | 0.7905331650290043 | 0.4352813820950415 | T | T | T |
| 0.8834337814082548 | 0.9239923401534457 | 0.5205668972874257 | T | T | T |
| 0.9261699933558702 | 0.5175136634034985 | 0.0827098793239784 | F | F | F |
| 0.9256298659981206 | 0.6418604393176309 | 0.1655305315718706 | T | T | T |
| 0.9250435458119588 | 0.7668547383220972 | 0.2482686102077665 | T | T | T |
| 0.9245129869723659 | 0.8923352681462926 | 0.3309884066518594 | T | T | T |
| 0.1194100044667721 | 0.5811638913835608 | 0.0294058438053355 | F | F | F |
| 0.1194100044667721 | 0.7065689027760556 | 0.1121157231293139 | F | F | F |
| 0.1181620906752497 | 0.8307722215207576 | 0.1948540827011641 | T | T | T |
| 0.1180401304830351 | 0.9559126898884971 | 0.2776348398775914 | T | T | T |
| 0.0746071176480099 | 0.6024107277263346 | 0.2166539789668089 | T | T | T |
| 0.0745297501089658 | 0.7277579594555404 | 0.2994661880999219 | T | T | T |

|                    |                     |                    |   |   |   |
|--------------------|---------------------|--------------------|---|---|---|
| 0.0744338226543007 | 0.8540210526430633  | 0.3821679413893388 | T | T | T |
| 0.0747886974260303 | 0.9799584383427294  | 0.4655555147187603 | T | T | T |
| 0.1180480171062058 | 0.5813871751804038  | 0.3603012087709370 | T | T | T |
| 0.1178891006617842 | 0.7066418535045625  | 0.4418327160802721 | T | T | T |
| 0.1248377397801723 | 0.8392972908447155  | 0.5252207817202467 | T | T | T |
| 0.0738300066441298 | 0.8522211622490019  | 0.0510568088182595 | F | F | F |
| 0.0738300066441298 | 0.9776261736414895  | 0.1337666881422379 | F | F | F |
| 0.0756795646780618 | 0.6244701563590003  | 0.5476847767149644 | T | T | T |
| 0.6194100044667721 | 0.6631659228764377  | 0.0216509650129240 | F | F | F |
| 0.6194100044667721 | 0.7885709342689324  | 0.1043608443369095 | F | F | F |
| 0.6184490541332763 | 0.9135785543292073  | 0.1871547447658826 | T | T | T |
| 0.5738300066441298 | 0.8921086520110038  | 0.0000000000000000 | F | F | F |
| 0.5738990650893766 | 0.5167841229659684  | 0.4137616540586419 | T | T | T |
| 0.5685657580088216 | 0.6479562878026957  | 0.4955558782990700 | T | T | T |
| 0.6182096944341539 | 0.5385498104230524  | 0.2699680126770991 | T | T | T |
| 0.6182280883772023 | 0.6640995780739212  | 0.3528163523816784 | T | T | T |
| 0.6190435897090052 | 0.7893668340684160  | 0.4353670198688421 | T | T | T |
| 0.6198930283803453 | 0.9190725067439064  | 0.5197102804751719 | T | T | T |
| 0.5738300066441298 | 0.5175136634034985  | 0.0827098793239784 | F | F | F |
| 0.5742059125764496 | 0.6418439122490057  | 0.1655261145192004 | T | T | T |
| 0.5743452811741390 | 0.7669022719856018  | 0.2482772629996653 | T | T | T |
| 0.5742138360113088 | 0.8929981443680640  | 0.3311714964389423 | T | T | T |
| 0.3823771709783265 | 0.3412423561748407  | 0.5269817667221802 | T | T | T |
| 0.5686974402793454 | 0.3011400323131309  | 0.5792360553849565 | T | T | T |
| 0.2500000000000000 | 0.0746099933052733  | 0.1245949913851589 | F | F | F |
| 0.2499583221991839 | 0.2001251454270628  | 0.2071906738478476 | T | T | T |
| 0.2500029155896164 | 0.3252019765147243  | 0.2898095174880271 | T | T | T |
| 0.2499851285291585 | 0.4501576125592524  | 0.3722533821744030 | T | T | T |
| 0.2500000000000000 | 0.4492049819127857  | 0.0418851120611805 | F | F | F |
| 0.2500777326685906 | 0.0763701929003305  | 0.4540219106682310 | T | T | T |
| 0.2412513750344818 | 0.1988641521372581  | 0.5343191156847132 | T | T | T |
| 0.7500000000000000 | 0.2951248323472200  | 0.0091716967570790 | F | F | F |
| 0.7500000000000000 | 0.4205298437397076  | 0.0918815760810574 | F | F | F |
| 0.7476357817471768 | 0.0476738243758040  | 0.5064331765452892 | T | T | T |
| 0.7499140912163063 | 0.04444484398497152 | 0.1744775118248232 | T | T | T |
| 0.7497618797921710 | 0.1690317765937927  | 0.2572714341699580 | T | T | T |
| 0.7496428707797405 | 0.2941490111713463  | 0.3400487665176444 | T | T | T |
| 0.7494634910549555 | 0.4195668702544625  | 0.4229540545031361 | T | T | T |
| 0.9406099943444133 | 0.0054327150181379  | 0.0365676919062707 | F | F | F |
| 0.9406099943444133 | 0.1308377264106326  | 0.1192775712302492 | F | F | F |
| 0.9391972729292933 | 0.2554897867788382  | 0.2019124169091558 | T | T | T |
| 0.9390491754831782 | 0.3803193152006276  | 0.2845551048902270 | T | T | T |
| 0.9397669193484751 | 0.0055481815078153  | 0.3669940915893917 | T | T | T |
| 0.9408182546351450 | 0.1318651954120064  | 0.4486400150483537 | T | T | T |
| 0.9403822919786237 | 0.2469327385255307  | 0.5301420360009905 | T | T | T |
| 0.4406099943444133 | 0.2388970992418606  | 0.0144891169119887 | F | F | F |
| 0.4406099943444133 | 0.3643021106343554  | 0.0971989962359672 | F | F | F |
| 0.4393894556536088 | 0.4892225096067966  | 0.1800390776730553 | T | T | T |
| 0.4391144990360890 | 0.1143846312240558  | 0.2627688844106209 | T | T | T |
| 0.4392381010707579 | 0.2394877519940506  | 0.3455941217935524 | T | T | T |
| 0.4396764398530591 | 0.3646661140894669  | 0.4285016975522144 | T | T | T |
| 0.4409484492000806 | 0.4952228395641085  | 0.5119700330088328 | T | T | T |
| 0.5593900056555867 | 0.0054327150181379  | 0.0365676919062707 | F | F | F |
| 0.5593900056555867 | 0.1308377264106326  | 0.1192775712302492 | F | F | F |
| 0.5605983516896523 | 0.2554606995262195  | 0.2019183090831644 | T | T | T |
| 0.5605090875410634 | 0.3802390274003806  | 0.2845878857962860 | T | T | T |
| 0.5606717860432039 | 0.0056589235416347  | 0.3678047296814345 | T | T | T |
| 0.5611671632119700 | 0.1325403178532494  | 0.4519742627148959 | T | T | T |

|                    |                    |                    |   |   |   |
|--------------------|--------------------|--------------------|---|---|---|
| 0.5831313729461995 | 0.2569600147853799 | 0.5366537119798076 | T | T | T |
| 0.0593900056555867 | 0.2388970992418606 | 0.0144891169119887 | F | F | F |
| 0.0593900056555867 | 0.3643021106343554 | 0.0971989962359672 | F | F | F |
| 0.0604616024128634 | 0.4892178595750881 | 0.1800432595157230 | T | T | T |
| 0.0604991201705210 | 0.1144647611310707 | 0.2627344664224215 | T | T | T |
| 0.0604381106135814 | 0.2400074294930454 | 0.3454314108958744 | T | T | T |
| 0.0608061060234166 | 0.3671168571890051 | 0.4281458229640309 | T | T | T |
| 0.0595620306395493 | 0.4949062055391552 | 0.5123869157721308 | T | T | T |
| 0.2500000000000000 | 0.5746099933052733 | 0.1245949913851589 | F | F | F |
| 0.2499157851364663 | 0.7001522051639114 | 0.2072044148474190 | T | T | T |
| 0.2499560099033442 | 0.8252074307297522 | 0.2898288318019636 | T | T | T |
| 0.2503002067920502 | 0.9501025240132731 | 0.3723064247208345 | T | T | T |
| 0.2500000000000000 | 0.9492049819127857 | 0.0418851120611805 | F | F | F |
| 0.2487969762564745 | 0.5766605337016287 | 0.4539787224747052 | T | T | T |
| 0.2494578659112638 | 0.6976063042870995 | 0.5352224923253017 | T | T | T |
| 0.7500000000000000 | 0.7951248323472200 | 0.0091716967570790 | F | F | F |
| 0.7500000000000000 | 0.9205298437397076 | 0.0918815760810574 | F | F | F |
| 0.7528260929051567 | 0.5474836255672624 | 0.5063817095100385 | T | T | T |
| 0.7498888933280035 | 0.5444284609210017 | 0.1744835388143854 | T | T | T |
| 0.7496105235021626 | 0.6690628649484561 | 0.2572659676554716 | T | T | T |
| 0.7490280427326240 | 0.7947548325376510 | 0.3399928382911824 | T | T | T |
| 0.7477890153713652 | 0.9213058015674614 | 0.4228681201035818 | T | T | T |
| 0.9406099943444133 | 0.5054327150181379 | 0.0365676919062707 | F | F | F |
| 0.9406099943444133 | 0.6308377264106326 | 0.1192775712302492 | F | F | F |
| 0.9392718950152391 | 0.7555990003723150 | 0.2019147900712571 | T | T | T |
| 0.9393057374275287 | 0.8804897363799326 | 0.2845484048862434 | T | T | T |
| 0.9389312621431054 | 0.5054283840547802 | 0.3670124490074386 | T | T | T |
| 0.9390006536591127 | 0.6316768682534348 | 0.4487809272700606 | T | T | T |
| 0.9385626597557792 | 0.7466535608735519 | 0.5307906337260402 | T | T | T |
| 0.4406099943444133 | 0.7388970992418606 | 0.0144891169119887 | F | F | F |
| 0.4406099943444133 | 0.8643021106343554 | 0.0971989962359672 | F | F | F |
| 0.4393428967918358 | 0.9893018306442599 | 0.1800318938814742 | T | T | T |
| 0.4392248142993375 | 0.6143440101579939 | 0.2627703915726477 | T | T | T |
| 0.4392284641681087 | 0.7401835094672298 | 0.3455633709417513 | T | T | T |
| 0.4394024991318607 | 0.8676080536541141 | 0.4286048406947784 | T | T | T |
| 0.4450822701252166 | 0.9894131523201662 | 0.5128431665539516 | T | T | T |
| 0.5593900056555867 | 0.5054327150181379 | 0.0365676919062707 | F | F | F |
| 0.5593900056555867 | 0.6308377264106326 | 0.1192775712302492 | F | F | F |
| 0.5605254811051276 | 0.7556160024354066 | 0.2019303079303013 | T | T | T |
| 0.5604432728695148 | 0.8805498121050265 | 0.2846952658457917 | T | T | T |
| 0.5604125273844541 | 0.5052698033260297 | 0.3670801276759583 | T | T | T |
| 0.5591926649681146 | 0.6310913041857696 | 0.4488590417146845 | T | T | T |
| 0.5624923781526558 | 0.7434080525653266 | 0.5311744941082629 | T | T | T |
| 0.0593900056555867 | 0.7388970992418606 | 0.0144891169119887 | F | F | F |
| 0.0593900056555867 | 0.8643021106343554 | 0.0971989962359672 | F | F | F |
| 0.0604905333918027 | 0.9893125806034192 | 0.1800284281718116 | T | T | T |
| 0.0603787535073306 | 0.6142427820624985 | 0.2627765093544172 | T | T | T |
| 0.0600242219273375 | 0.7396955500838099 | 0.3455043256059008 | T | T | T |
| 0.0594698140231998 | 0.8664784014344783 | 0.4282366697807728 | T | T | T |
| 0.0581695993064803 | 0.9899305626219783 | 0.5122107393301554 | T | T | T |

(9) [100]<sub>mol</sub>

100-water-mol

1.0000000000000000

10.3178596496581996 0.0000000000000000 0.0000000000000000

0.0000000000000000 10.3475399017334002 0.0000000000000000

0.0000000000000000 0.0000000000000000 26.7222900390625000

H N O Ta



## Selective dynamics

## Direct

|                    |                    |                    |       |
|--------------------|--------------------|--------------------|-------|
| 0.2001257195433651 | 0.5043892648889057 | 0.4986017347446902 | T T T |
| 0.2276122097566558 | 0.6564838754212619 | 0.5050730628429745 | T T T |
| 0.2367299944162369 | 0.2500000000000000 | 0.0731099992990494 | F F F |
| 0.2349157690585635 | 0.2509603127818411 | 0.2192065409788348 | T T T |
| 0.2520380375935664 | 0.2495002472742305 | 0.3644561081353495 | T T T |
| 0.7367299795150757 | 0.2500000000000000 | 0.0000000000000000 | F F F |
| 0.7348844471086490 | 0.2503235619502018 | 0.1472019634483165 | T T T |
| 0.7364953678858768 | 0.2508502409808041 | 0.2936492130772394 | T T T |
| 0.7218169510022707 | 0.2532850808623737 | 0.4383101629423805 | T T T |
| 0.7632699608802795 | 0.7500000000000000 | 0.0731099992990494 | F F F |
| 0.7636788132617873 | 0.7509686190309075 | 0.2198257175820495 | T T T |
| 0.7567893505965017 | 0.7515628071138589 | 0.3649083988044167 | T T T |
| 0.2632699906826019 | 0.7500000000000000 | 0.0000000000000000 | F F F |
| 0.2654423239035198 | 0.7494665600761790 | 0.1473992834757289 | T T T |
| 0.2643417420854862 | 0.7493237792674304 | 0.2946428179468351 | T T T |
| 0.2734380303823161 | 0.7622726136476429 | 0.4403243903825644 | T T T |
| 0.9530599713325500 | 0.1194199994206429 | 0.0731099992990494 | F F F |
| 0.9529409024956031 | 0.1198037688175962 | 0.2201944644836719 | T T T |
| 0.9499489190797146 | 0.1184130972442649 | 0.3694443337019467 | T T T |
| 0.6913700103759766 | 0.0738499984145164 | 0.0731099992990494 | F F F |
| 0.6925623007365824 | 0.0736544008018305 | 0.2196205811969991 | T T T |
| 0.6838119542325553 | 0.0724801508144266 | 0.3655920761115583 | T T T |
| 0.4530600011348724 | 0.1194199994206429 | 0.0000000000000000 | F F F |
| 0.4535139708877628 | 0.1198326188850356 | 0.1466853796914321 | T T T |
| 0.4538524341180817 | 0.1197934719494758 | 0.2902292248527978 | T T T |
| 0.4578110386828252 | 0.1139108301295636 | 0.4514485765163229 | T T T |
| 0.1913699954748154 | 0.0738499984145164 | 0.0000000000000000 | F F F |
| 0.1925992148622557 | 0.0743414029331751 | 0.1470563556561353 | T T T |
| 0.1903223884608431 | 0.0760445008158748 | 0.2935465986848922 | T T T |
| 0.2009939644573311 | 0.0779802525682394 | 0.4391678696393648 | T T T |
| 0.0469399988651276 | 0.6194199919700623 | 0.0731099992990494 | F F F |
| 0.0477658221368143 | 0.6201144899117615 | 0.2207625873122605 | T T T |
| 0.0499840263294499 | 0.6173998800778506 | 0.3741688843810243 | T T T |
| 0.3086299896240234 | 0.5738499760627747 | 0.0731099992990494 | F F F |
| 0.3091323219609280 | 0.5731785261724619 | 0.2207200552034761 | T T T |
| 0.3129101256311134 | 0.5700413308143376 | 0.3692957743683625 | T T T |
| 0.5469399690628052 | 0.6194199919700623 | 0.0000000000000000 | F F F |
| 0.5463621798912520 | 0.6198942864025421 | 0.1466546585021443 | T T T |
| 0.5455684762381675 | 0.6205345351582953 | 0.2925855536915264 | T T T |
| 0.5438327957105218 | 0.6228554121345712 | 0.4477118195024216 | T T T |
| 0.8086299896240234 | 0.5738499760627747 | 0.0000000000000000 | F F F |
| 0.8082719274585364 | 0.5750043338247613 | 0.1473305612760853 | T T T |
| 0.8105638574087606 | 0.5758063336665041 | 0.2943124257265093 | T T T |
| 0.7944433270317869 | 0.5767957017391999 | 0.4402890054957904 | T T T |
| 0.9530599713325500 | 0.3805799782276154 | 0.0731099992990494 | F F F |
| 0.9532923096799326 | 0.3813455750984178 | 0.2210180276868867 | T T T |
| 0.9507350060731988 | 0.3819644209433825 | 0.3689187154902063 | T T T |
| 0.6913700103759766 | 0.4261499941349030 | 0.0731099992990494 | F F F |
| 0.6919812517914364 | 0.4276325110182094 | 0.2195593817721787 | T T T |
| 0.6848963806062656 | 0.4306379375549851 | 0.3650782725346271 | T T T |
| 0.4530600011348724 | 0.3805799782276154 | 0.0000000000000000 | F F F |
| 0.4533827146976728 | 0.3806206760953529 | 0.1467375904776809 | T T T |
| 0.4536906867092464 | 0.3814824970607867 | 0.2913969037997982 | T T T |
| 0.4577091419432681 | 0.3816863226394614 | 0.4411446529276697 | T T T |
| 0.1913699954748154 | 0.4261499941349030 | 0.0000000000000000 | F F F |

|                    |                    |                    |       |
|--------------------|--------------------|--------------------|-------|
| 0.1923268934376517 | 0.4268327570138979 | 0.1473388298658347 | T T T |
| 0.1909682795482178 | 0.4260311502747574 | 0.2949025911798569 | T T T |
| 0.1921543882217187 | 0.4024144684448713 | 0.4427500181194401 | T T T |
| 0.0469399988651276 | 0.8805799484252930 | 0.0731099992990494 | F F F |
| 0.0474652639590716 | 0.8806327888683428 | 0.2206930626971235 | T T T |
| 0.0479117843487785 | 0.8812352114176214 | 0.3701021034383118 | T T T |
| 0.3086299896240234 | 0.9261499643325806 | 0.0731099992990494 | F F F |
| 0.3078294810300805 | 0.9263870872185680 | 0.2195756303989765 | T T T |
| 0.3116709259306621 | 0.9312100462878724 | 0.3645518694023037 | T T T |
| 0.5469399690628052 | 0.8805799484252930 | 0.0000000000000000 | F F F |
| 0.5467019404714856 | 0.8807093808853851 | 0.1465089413834293 | T T T |
| 0.5466929574589758 | 0.8812130216236467 | 0.2913791448249873 | T T T |
| 0.5422496934394486 | 0.8794686901817282 | 0.4314075047900124 | T T T |
| 0.8086299896240234 | 0.9261499643325806 | 0.0000000000000000 | F F F |
| 0.8082361633982504 | 0.9256895813473452 | 0.1472467488989953 | T T T |
| 0.8107672303808352 | 0.9265921832717008 | 0.2945401680040763 | T T T |
| 0.7940251283210622 | 0.9233221313831520 | 0.4424678902657191 | T T T |
| 0.2653269307746415 | 0.5699265647769021 | 0.5115822002069229 | T T T |
| 0.8021000027656555 | 0.2500000000000000 | 0.0731099992990494 | F F F |
| 0.8032129265232473 | 0.2505924268078128 | 0.2203626223280544 | T T T |
| 0.8017846712885403 | 0.2505164694200082 | 0.3685416826163169 | T T T |
| 0.3021000027656555 | 0.2500000000000000 | 0.0000000000000000 | F F F |
| 0.3015703883219508 | 0.2508106434078461 | 0.1465249795366796 | T T T |
| 0.3036999952074589 | 0.2515943581174152 | 0.2907083785817279 | T T T |
| 0.3049806387760816 | 0.2443823199089595 | 0.4335200436157413 | T T T |
| 0.1978999972343445 | 0.7500000000000000 | 0.0731099992990494 | F F F |
| 0.1984498350481624 | 0.7492499533646461 | 0.2211213199379139 | T T T |
| 0.1997356173894033 | 0.7478019616922678 | 0.3716487464570851 | T T T |
| 0.6978999972343445 | 0.7500000000000000 | 0.0000000000000000 | F F F |
| 0.6985418055599190 | 0.7500673302524031 | 0.1466215239902609 | T T T |
| 0.6971904163615892 | 0.7505469147976869 | 0.2912438702031053 | T T T |
| 0.6958146659958446 | 0.7541727920641352 | 0.4328837768009977 | T T T |
| 0.8665899634361267 | 0.5594399571418762 | 0.0731099992990494 | F F F |
| 0.8679418466856569 | 0.5599345060175989 | 0.2208617074070872 | T T T |
| 0.8680842331824982 | 0.5600503153361568 | 0.3703062006645774 | T T T |
| 0.3665899932384491 | 0.5594399571418762 | 0.0000000000000000 | F F F |
| 0.3655040349775269 | 0.5599476345241127 | 0.1475105389246408 | T T T |
| 0.3639472490548451 | 0.5605163941047446 | 0.2941676904487008 | T T T |
| 0.3748625899172442 | 0.5546562034882959 | 0.4402135854567837 | T T T |
| 0.1334099918603897 | 0.0594399981200695 | 0.0731099992990494 | F F F |
| 0.1330228616033012 | 0.0596190777506903 | 0.2204199361666414 | T T T |
| 0.1337365952545046 | 0.0593335206501191 | 0.3691362015941981 | T T T |
| 0.6334099769592285 | 0.0594399981200695 | 0.0000000000000000 | F F F |
| 0.6335503139934604 | 0.0594478337655406 | 0.1469470292167603 | T T T |
| 0.6333029242468941 | 0.0595157473005716 | 0.2913716443873010 | T T T |
| 0.6372498672640008 | 0.0567235898489121 | 0.4349522875939292 | T T T |
| 0.8665899634361267 | 0.9405599832534790 | 0.0731099992990494 | F F F |
| 0.8676391140736537 | 0.9406785213887868 | 0.2205858729611107 | T T T |
| 0.8668081947069439 | 0.9406638721700892 | 0.3696658284031402 | T T T |
| 0.3665899932384491 | 0.9405599832534790 | 0.0000000000000000 | F F F |
| 0.3664773567413563 | 0.9410795125739287 | 0.1468906176797003 | T T T |
| 0.3665175336361228 | 0.9415055614289880 | 0.2912967103950085 | T T T |
| 0.3595456693357635 | 0.9392373291122416 | 0.4338932974053530 | T T T |
| 0.1334099918603897 | 0.4405599832534790 | 0.0731099992990494 | F F F |
| 0.1342334092586104 | 0.4407405255973792 | 0.2213571974109549 | T T T |
| 0.1363198860479270 | 0.4379770112029810 | 0.3726995289590522 | T T T |
| 0.6334099769592285 | 0.4405599832534790 | 0.0000000000000000 | F F F |
| 0.6330719729097571 | 0.4414957122087783 | 0.1468687695234970 | T T T |

|                    |                    |                    |       |
|--------------------|--------------------|--------------------|-------|
| 0.6324066582824779 | 0.4430180760731158 | 0.2910902719639566 | T T T |
| 0.6455885129132891 | 0.4362039057378778 | 0.4345438665181368 | T T T |

**(10) [100]<sub>dis</sub>**

100-water-dis

|                     |                     |                     |  |
|---------------------|---------------------|---------------------|--|
| 1.000000000000000   |                     |                     |  |
| 10.3178596496581996 | 0.000000000000000   | 0.000000000000000   |  |
| 0.000000000000000   | 10.3475399017334002 | 0.000000000000000   |  |
| 0.000000000000000   | 0.000000000000000   | 26.7222900390625000 |  |

H N O Ta

2 70 1 42

Selective dynamics

Direct

|                    |                    |                    |       |
|--------------------|--------------------|--------------------|-------|
| 0.1286554224563521 | 0.4248702688095209 | 0.4726239111728857 | T T T |
| 0.3630008802520037 | 0.5916905554321323 | 0.5430097381663301 | T T T |
| 0.2367299944162369 | 0.250000000000000  | 0.0731099992990494 | F F F |
| 0.2350095621576267 | 0.2507261407129095 | 0.2190991993427237 | T T T |
| 0.2552727090826448 | 0.2513829203478330 | 0.3642848520690954 | T T T |
| 0.7367299795150757 | 0.250000000000000  | 0.000000000000000  | F F F |
| 0.7346632980795329 | 0.2499711825840084 | 0.1470904127922086 | T T T |
| 0.7364129677994224 | 0.2497913871625479 | 0.2933163240053530 | T T T |
| 0.7214503633334152 | 0.2527898627212777 | 0.4377632213793198 | T T T |
| 0.7632699608802795 | 0.750000000000000  | 0.0731099992990494 | F F F |
| 0.7635088925689643 | 0.7508444088797324 | 0.2195874379195143 | T T T |
| 0.7570169402237311 | 0.7511514927138230 | 0.3648058091047527 | T T T |
| 0.2632699906826019 | 0.750000000000000  | 0.000000000000000  | F F F |
| 0.2655414893499118 | 0.7489909429450432 | 0.1473778327134659 | T T T |
| 0.2651465356937250 | 0.7484550740845024 | 0.2943858401828688 | T T T |
| 0.2812595173011478 | 0.7589292193048726 | 0.4393620283281273 | T T T |
| 0.9530599713325500 | 0.1194199994206429 | 0.0731099992990494 | F F F |
| 0.9530707293472988 | 0.1192589748409333 | 0.2201394212255247 | T T T |
| 0.9505559352444994 | 0.1174369127013351 | 0.3694619969545651 | T T T |
| 0.6913700103759766 | 0.0738499984145164 | 0.0731099992990494 | F F F |
| 0.6927932779528355 | 0.0730055690037985 | 0.2193915218759249 | T T T |
| 0.6850278680116914 | 0.0711590773278536 | 0.3652221873206257 | T T T |
| 0.4530600011348724 | 0.1194199994206429 | 0.000000000000000  | F F F |
| 0.4534165344333700 | 0.1195537170990376 | 0.1467244477246223 | T T T |
| 0.4545676894646665 | 0.1190229488390499 | 0.2901223063136948 | T T T |
| 0.4596370647597406 | 0.1134107545645940 | 0.4510021996569019 | T T T |
| 0.1913699954748154 | 0.0738499984145164 | 0.000000000000000  | F F F |
| 0.1924758331484170 | 0.0740475404881635 | 0.1470718048727626 | T T T |
| 0.1910082709057277 | 0.0753850167629890 | 0.2935904984748259 | T T T |
| 0.2045256869595342 | 0.0758459789755881 | 0.4383534344379645 | T T T |
| 0.0469399988651276 | 0.6194199919700623 | 0.0731099992990494 | F F F |
| 0.0475047062491821 | 0.6197008221987421 | 0.2206813833466613 | T T T |
| 0.0489652169202215 | 0.6163603056953749 | 0.3740553688009686 | T T T |
| 0.3086299896240234 | 0.5738499760627747 | 0.0731099992990494 | F F F |
| 0.3084979115857341 | 0.5718286444225387 | 0.2209763237732143 | T T T |
| 0.3084515248891491 | 0.5679011907679424 | 0.3696879161175272 | T T T |
| 0.5469399690628052 | 0.6194199919700623 | 0.000000000000000  | F F F |
| 0.5460782294969341 | 0.6197117883228201 | 0.1468886782826941 | T T T |
| 0.5449388417731631 | 0.6201257232737717 | 0.2934904798681774 | T T T |
| 0.5471828444114490 | 0.6224170272361554 | 0.4520942051926191 | T T T |
| 0.8086299896240234 | 0.5738499760627747 | 0.000000000000000  | F F F |
| 0.8079191241056951 | 0.5748313181894370 | 0.1471837248771826 | T T T |
| 0.8095815225267853 | 0.5756619101924030 | 0.2937383475319872 | T T T |
| 0.7945863256317942 | 0.5757353415681580 | 0.439335552295615  | T T T |
| 0.9530599713325500 | 0.3805799782276154 | 0.0731099992990494 | F F F |

|                    |                    |                    |       |
|--------------------|--------------------|--------------------|-------|
| 0.9531614625784331 | 0.3809095268297616 | 0.2203889679732609 | T T T |
| 0.9504899909765636 | 0.3812667596447519 | 0.3669890978730846 | T T T |
| 0.6913700103759766 | 0.4261499941349030 | 0.0731099992990494 | F F F |
| 0.6918149138330535 | 0.4269994727735220 | 0.2193854553674683 | T T T |
| 0.6860979989646906 | 0.4297551923496855 | 0.3644124647512810 | T T T |
| 0.4530600011348724 | 0.3805799782276154 | 0.0000000000000000 | F F F |
| 0.4531486795123785 | 0.3803875298358310 | 0.1466126494406339 | T T T |
| 0.4531130188435522 | 0.3813062436822388 | 0.2910293084639518 | T T T |
| 0.4562535024164744 | 0.3836418354615977 | 0.4361667029408723 | T T T |
| 0.1913699954748154 | 0.4261499941349030 | 0.0000000000000000 | F F F |
| 0.1920399516055952 | 0.4265336588259004 | 0.1472255086907736 | T T T |
| 0.1891202485199023 | 0.4244867425589816 | 0.2947953979939358 | T T T |
| 0.1853751768650272 | 0.3957559462985314 | 0.4433252939767159 | T T T |
| 0.0469399988651276 | 0.8805799484252930 | 0.0731099992990494 | F F F |
| 0.0478092866153326 | 0.8800755697844386 | 0.2205375469462106 | T T T |
| 0.0489909777129770 | 0.8799275929829018 | 0.3697030544002178 | T T T |
| 0.3086299896240234 | 0.9261499643325806 | 0.0731099992990494 | F F F |
| 0.3077507282370300 | 0.9256042033974768 | 0.2194499289487117 | T T T |
| 0.3121427194066518 | 0.9287761134200788 | 0.3640687123031917 | T T T |
| 0.5469399690628052 | 0.8805799484252930 | 0.0000000000000000 | F F F |
| 0.5465393412228535 | 0.8804876739541458 | 0.1462745620927575 | T T T |
| 0.5469516721789990 | 0.8804770460961910 | 0.2907046173666246 | T T T |
| 0.5439714869811126 | 0.8784854487856779 | 0.4306761717451998 | T T T |
| 0.8086299896240234 | 0.9261499643325806 | 0.0000000000000000 | F F F |
| 0.8081816484203946 | 0.9255112072274932 | 0.1470985420649304 | T T T |
| 0.8112587015358961 | 0.9257385309056186 | 0.2943021222191723 | T T T |
| 0.7953958929216203 | 0.9221565606392124 | 0.4425537131286375 | T T T |
| 0.3159393410980147 | 0.5488106286583403 | 0.5163090523484957 | T T T |
| 0.8021000027656555 | 0.2500000000000000 | 0.0731099992990494 | F F F |
| 0.8032377399377012 | 0.2501958799239695 | 0.2200865533832836 | T T T |
| 0.8015467206060028 | 0.2496398579718498 | 0.3678252461589829 | T T T |
| 0.3021000027656555 | 0.2500000000000000 | 0.0000000000000000 | F F F |
| 0.3017454462643693 | 0.2503972966685073 | 0.1464525736284796 | T T T |
| 0.3052963553906897 | 0.2502083226228640 | 0.2904138711338847 | T T T |
| 0.3114495065143398 | 0.2420032504881919 | 0.4324852624322735 | T T T |
| 0.1978999972343445 | 0.7500000000000000 | 0.0731099992990494 | F F F |
| 0.1989582006668064 | 0.7476266683556999 | 0.2210417964582290 | T T T |
| 0.2039831721267070 | 0.7434718708633796 | 0.3714913144634235 | T T T |
| 0.6978999972343445 | 0.7500000000000000 | 0.0000000000000000 | F F F |
| 0.6981913466530792 | 0.7499367275136055 | 0.1465280115255914 | T T T |
| 0.6971119560324828 | 0.7498454751865625 | 0.2911247862956749 | T T T |
| 0.6972316220994774 | 0.7537743583284575 | 0.4332919846140095 | T T T |
| 0.8665899634361267 | 0.5594399571418762 | 0.0731099992990494 | F F F |
| 0.8675746452194367 | 0.5594415687093125 | 0.2205688623542555 | T T T |
| 0.8657559449087870 | 0.5598136226669438 | 0.3699876338745348 | T T T |
| 0.3665899932384491 | 0.5594399571418762 | 0.0000000000000000 | F F F |
| 0.3652501671285019 | 0.5598544271091495 | 0.1478238232345644 | T T T |
| 0.3630344527447837 | 0.5604670523319532 | 0.2958278859584495 | T T T |
| 0.3757301229486218 | 0.5623819044676227 | 0.4470943213116664 | T T T |
| 0.1334099918603897 | 0.0594399981200695 | 0.0731099992990494 | F F F |
| 0.1330043026042874 | 0.0590239277095100 | 0.2203484818708003 | T T T |
| 0.1337968161441146 | 0.0570740506357740 | 0.3687904701761494 | T T T |
| 0.6334099769592285 | 0.0594399981200695 | 0.0000000000000000 | F F F |
| 0.6335101101778710 | 0.0591719638963610 | 0.1468193499969611 | T T T |
| 0.6341747118844751 | 0.0583471681844606 | 0.2910349855464224 | T T T |
| 0.6390568833596867 | 0.0542785599787173 | 0.4344438747332657 | T T T |
| 0.8665899634361267 | 0.9405599832534790 | 0.0731099992990494 | F F F |
| 0.8681448141319957 | 0.9397788459733024 | 0.2203167582846367 | T T T |

|                    |                    |                    |       |
|--------------------|--------------------|--------------------|-------|
| 0.8683839095003003 | 0.9388948946436936 | 0.3691977873852826 | T T T |
| 0.3665899932384491 | 0.9405599832534790 | 0.0000000000000000 | F F F |
| 0.3663730119200070 | 0.9408625376333004 | 0.1468529027422853 | T T T |
| 0.3668458908635854 | 0.9407922835873672 | 0.2909756538853768 | T T T |
| 0.3597913440825012 | 0.9377326253574784 | 0.4333537829401470 | T T T |
| 0.1334099918603897 | 0.4405599832534790 | 0.0731099992990494 | F F F |
| 0.1342069242089253 | 0.4403852945692697 | 0.2208157868302568 | T T T |
| 0.1333606225304822 | 0.4401921402379410 | 0.3695954585109627 | T T T |
| 0.6334099769592285 | 0.4405599832534790 | 0.0000000000000000 | F F F |
| 0.6326918282560423 | 0.4413689221567947 | 0.1468052675073690 | T T T |
| 0.6315286169987264 | 0.4429525055769264 | 0.2908799208684800 | T T T |
| 0.6427190387734051 | 0.4335055422221576 | 0.4338436937634831 | T T T |

**(11) [100+O<sub>N3</sub>]<sub>mol</sub>**

100-on-water-mol

1.0000000000000000

|                     |                     |                     |
|---------------------|---------------------|---------------------|
| 10.3178596496581996 | 0.0000000000000000  | 0.0000000000000000  |
| 0.0000000000000000  | 10.3475399017334002 | 0.0000000000000000  |
| 0.0000000000000000  | 0.0000000000000000  | 26.7222900390625000 |

H N O Ta

2 69 2 42

Selective dynamics

Direct

|                    |                    |                    |       |
|--------------------|--------------------|--------------------|-------|
| 0.2168768645357723 | 0.6373887774233908 | 0.5204416392099079 | T T T |
| 0.2060538741935481 | 0.4920121829330274 | 0.4992450731112753 | T T T |
| 0.2367299944162369 | 0.2500000000000000 | 0.0731099992990494 | F F F |
| 0.2357600529867218 | 0.2501945847970599 | 0.2194983833041498 | T T T |
| 0.2497224448754904 | 0.2493744380506399 | 0.3647303118152984 | T T T |
| 0.7367299795150757 | 0.2500000000000000 | 0.0000000000000000 | F F F |
| 0.7349420791502047 | 0.2504262509830071 | 0.1475734658747251 | T T T |
| 0.7364888533549674 | 0.2510901294050459 | 0.2943598414476718 | T T T |
| 0.7210012972528315 | 0.2534835282906091 | 0.4394036737909678 | T T T |
| 0.7632699608802795 | 0.7500000000000000 | 0.0731099992990494 | F F F |
| 0.7637213232177660 | 0.7499352595606875 | 0.2199225393920711 | T T T |
| 0.7521212008740048 | 0.7515598545195498 | 0.3656703691441818 | T T T |
| 0.2632699906826019 | 0.7500000000000000 | 0.0000000000000000 | F F F |
| 0.2652591588321768 | 0.7497784805331489 | 0.1475554442118499 | T T T |
| 0.2638285316054416 | 0.7503380994915081 | 0.2945732119631748 | T T T |
| 0.2824275578580375 | 0.7568347044015791 | 0.4395917684829324 | T T T |
| 0.9530599713325500 | 0.1194199994206429 | 0.0731099992990494 | F F F |
| 0.9527837971773088 | 0.1197442260485879 | 0.2203603759607695 | T T T |
| 0.9515668436298006 | 0.1199493922714501 | 0.3699338299932818 | T T T |
| 0.6913700103759766 | 0.0738499984145164 | 0.0731099992990494 | F F F |
| 0.6929691315587236 | 0.0725946341499506 | 0.2198252342372454 | T T T |
| 0.6881643236604966 | 0.0704669489181273 | 0.3658599495162217 | T T T |
| 0.4530600011348724 | 0.1194199994206429 | 0.0000000000000000 | F F F |
| 0.4535694502674909 | 0.1197101924761545 | 0.1464632725676675 | T T T |
| 0.4546847189527244 | 0.1201288435381588 | 0.2905840116594088 | T T T |
| 0.4615751025379585 | 0.1247712538664016 | 0.4400646861394658 | T T T |
| 0.1913699954748154 | 0.0738499984145164 | 0.0000000000000000 | F F F |
| 0.1917888103060954 | 0.0749567821195617 | 0.1472020759000418 | T T T |
| 0.1893519593625501 | 0.0757735025481986 | 0.2943116898988816 | T T T |
| 0.2052567148899704 | 0.0801322302772201 | 0.4413398582425380 | T T T |
| 0.0469399988651276 | 0.6194199919700623 | 0.0731099992990494 | F F F |
| 0.0477382155650189 | 0.6198649896345192 | 0.2204671347988783 | T T T |
| 0.0495450798910245 | 0.6205880795613309 | 0.3723479559007907 | T T T |
| 0.3086299896240234 | 0.5738499760627747 | 0.0731099992990494 | F F F |
| 0.3085121482135203 | 0.5724684924487319 | 0.2204760147695464 | T T T |

|                    |                    |                    |       |
|--------------------|--------------------|--------------------|-------|
| 0.3105471885744169 | 0.5700627078823596 | 0.3679262648127583 | T T T |
| 0.5469399690628052 | 0.6194199919700623 | 0.0000000000000000 | F F F |
| 0.5465506783159748 | 0.6196985491248930 | 0.1465319884129616 | T T T |
| 0.5457613898575111 | 0.6201881331781847 | 0.2921709602382735 | T T T |
| 0.5408160213940343 | 0.6203545409293976 | 0.4409128672897761 | T T T |
| 0.8086299896240234 | 0.5738499760627747 | 0.0000000000000000 | F F F |
| 0.8088016011992210 | 0.5750480868460603 | 0.1474207863652979 | T T T |
| 0.8121214261740680 | 0.5763992011378526 | 0.2951407539867369 | T T T |
| 0.7915398135350581 | 0.5774058726020703 | 0.4421361593507397 | T T T |
| 0.9530599713325500 | 0.3805799782276154 | 0.0731099992990494 | F F F |
| 0.9530270700164440 | 0.3811509623940161 | 0.2211108623839704 | T T T |
| 0.9503013919240773 | 0.3844045929654789 | 0.3702724513665642 | T T T |
| 0.6913700103759766 | 0.4261499941349030 | 0.0731099992990494 | F F F |
| 0.6924134747002754 | 0.4289800710450756 | 0.2199303306266528 | T T T |
| 0.6835533580404605 | 0.4322674053268264 | 0.3659398320520655 | T T T |
| 0.4530600011348724 | 0.3805799782276154 | 0.0000000000000000 | F F F |
| 0.4534296298530432 | 0.3805937541556628 | 0.1467371604173045 | T T T |
| 0.4537451006607068 | 0.3812671605638580 | 0.2915797681656162 | T T T |
| 0.1913699954748154 | 0.4261499941349030 | 0.0000000000000000 | F F F |
| 0.1917007666326275 | 0.4256804631531468 | 0.1474746145048584 | T T T |
| 0.1906674933606404 | 0.4247456022042333 | 0.2949243179109538 | T T T |
| 0.2024340790060902 | 0.4123824554958699 | 0.4413387510899879 | T T T |
| 0.0469399988651276 | 0.8805799484252930 | 0.0731099992990494 | F F F |
| 0.0475903558395724 | 0.8806268946981217 | 0.2203658505351195 | T T T |
| 0.0512423873646472 | 0.8834439584204363 | 0.3697802895697635 | T T T |
| 0.3086299896240234 | 0.9261499643325806 | 0.0731099992990494 | F F F |
| 0.3077718559652697 | 0.9277946142895592 | 0.2196703681736137 | T T T |
| 0.3167668270376341 | 0.9323067654925140 | 0.3651683988104035 | T T T |
| 0.5469399690628052 | 0.8805799484252930 | 0.0000000000000000 | F F F |
| 0.5468956165334040 | 0.8806765220094311 | 0.1466108592788711 | T T T |
| 0.5472860078855875 | 0.8814665589661591 | 0.2912541265407526 | T T T |
| 0.5446828312474457 | 0.8857974677463747 | 0.4454611409180844 | T T T |
| 0.8086299896240234 | 0.9261499643325806 | 0.0000000000000000 | F F F |
| 0.8085115087272505 | 0.9250208092796076 | 0.1473549249338936 | T T T |
| 0.8110269612916955 | 0.9250242141284032 | 0.2945649946050519 | T T T |
| 0.7991247230649314 | 0.9225677520039404 | 0.4409636760697411 | T T T |
| 0.4570495864801131 | 0.3896565171060334 | 0.4494312093295605 | T T T |
| 0.2665439206360642 | 0.5578825275018137 | 0.5156044121818837 | T T T |
| 0.8021000027656555 | 0.2500000000000000 | 0.0731099992990494 | F F F |
| 0.8029169264182995 | 0.2508852227922008 | 0.2203398878146892 | T T T |
| 0.8017590199449215 | 0.2519256336192864 | 0.3688669299168051 | T T T |
| 0.3021000027656555 | 0.2500000000000000 | 0.0000000000000000 | F F F |
| 0.3016729784816904 | 0.2505253175829425 | 0.1461935780153850 | T T T |
| 0.3035287182634313 | 0.2511315294750995 | 0.2903883949202019 | T T T |
| 0.3066505712387056 | 0.2430048764576486 | 0.4330004607897076 | T T T |
| 0.1978999972343445 | 0.7500000000000000 | 0.0731099992990494 | F F F |
| 0.1980747579391816 | 0.7498975515073312 | 0.2202670813907049 | T T T |
| 0.2006783199957428 | 0.7509644096232317 | 0.3687242065128507 | T T T |
| 0.6978999972343445 | 0.7500000000000000 | 0.0000000000000000 | F F F |
| 0.6985393047481993 | 0.7499431944987061 | 0.1463305466367187 | T T T |
| 0.6972428460531407 | 0.7508527199720593 | 0.2911108817888806 | T T T |
| 0.6940592184414746 | 0.7545977664259881 | 0.4339383539247318 | T T T |
| 0.8665899634361267 | 0.5594399571418762 | 0.0731099992990494 | F F F |
| 0.8673824077172242 | 0.5600103326442560 | 0.2205787109423337 | T T T |
| 0.8681364159001772 | 0.5615696551214235 | 0.3697269400439874 | T T T |
| 0.3665899932384491 | 0.5594399571418762 | 0.0000000000000000 | F F F |
| 0.3661592034273796 | 0.5600989336026738 | 0.1470641495756703 | T T T |
| 0.3645778922512137 | 0.5602575032279149 | 0.2928568675978028 | T T T |

|                    |                    |                    |       |
|--------------------|--------------------|--------------------|-------|
| 0.3604726920563210 | 0.5743748847824210 | 0.4388086629211996 | T T T |
| 0.1334099918603897 | 0.0594399981200695 | 0.0731099992990494 | F F F |
| 0.1329914135311646 | 0.0593932235933664 | 0.2201102620758665 | T T T |
| 0.1339513510133248 | 0.0617878796008211 | 0.3686963863581115 | T T T |
| 0.6334099769592285 | 0.0594399981200695 | 0.0000000000000000 | F F F |
| 0.6337667979789163 | 0.0600481396586129 | 0.1467748568164355 | T T T |
| 0.6350425452661368 | 0.0606329014802037 | 0.2913534723619138 | T T T |
| 0.6443517856351566 | 0.0628665168911351 | 0.4351803907973343 | T T T |
| 0.8665899634361267 | 0.9405599832534790 | 0.0731099992990494 | F F F |
| 0.8671946393746258 | 0.9407189207821516 | 0.2203814472520016 | T T T |
| 0.8671682945325054 | 0.9402490340300552 | 0.3697916544683682 | T T T |
| 0.3665899932384491 | 0.9405599832534790 | 0.0000000000000000 | F F F |
| 0.3669963927117407 | 0.9406059724194812 | 0.1466536833932237 | T T T |
| 0.3682470467914968 | 0.9422116917387672 | 0.2909591369688709 | T T T |
| 0.3632374366036077 | 0.9443289472255338 | 0.4341120572476570 | T T T |
| 0.1334099918603897 | 0.4405599832534790 | 0.0731099992990494 | F F F |
| 0.1338936906957250 | 0.4409297400824899 | 0.2209052219828672 | T T T |
| 0.1374352427095935 | 0.4400243924199596 | 0.3716839927833859 | T T T |
| 0.6334099769592285 | 0.4405599832534790 | 0.0000000000000000 | F F F |
| 0.6334050627004040 | 0.4405712221362243 | 0.1467951664738709 | T T T |
| 0.6325842077124652 | 0.4423594135619854 | 0.2913313741952034 | T T T |
| 0.6457639350199520 | 0.4435043914326081 | 0.4351009961905124 | T T T |

**(12) [100+O<sub>N3</sub>]<sub>dis</sub>**

100-on-water-dis

1.0000000000000000

|                     |                     |                     |
|---------------------|---------------------|---------------------|
| 10.3178596496581996 | 0.0000000000000000  | 0.0000000000000000  |
| 0.0000000000000000  | 10.3475399017334002 | 0.0000000000000000  |
| 0.0000000000000000  | 0.0000000000000000  | 26.7222900390625000 |

H N O Ta

2 69 2 42

Selective dynamics

Direct

|                    |                    |                    |       |
|--------------------|--------------------|--------------------|-------|
| 0.3668930493249306 | 0.5967769507170699 | 0.5425939835008390 | T T T |
| 0.1343828969403688 | 0.4269986404923844 | 0.4720724252889210 | T T T |
| 0.2367299944162369 | 0.2500000000000000 | 0.0731099992990494 | F F F |
| 0.2357134348012800 | 0.2505572091077713 | 0.2193927052916003 | T T T |
| 0.2537523373617959 | 0.2508323318904651 | 0.3646392805187108 | T T T |
| 0.7367299795150757 | 0.2500000000000000 | 0.0000000000000000 | F F F |
| 0.7344436906036479 | 0.2501143482960470 | 0.1474658780949536 | T T T |
| 0.7358789743002602 | 0.2501999860703576 | 0.2938445625758946 | T T T |
| 0.7196901113739420 | 0.2531284500595346 | 0.4390798980287089 | T T T |
| 0.7632699608802795 | 0.7500000000000000 | 0.0731099992990494 | F F F |
| 0.7632867746847697 | 0.7500833795370822 | 0.2198129907230154 | T T T |
| 0.7531661783703599 | 0.7511724771304706 | 0.3655698592246563 | T T T |
| 0.2632699906826019 | 0.7500000000000000 | 0.0000000000000000 | F F F |
| 0.2651737904268616 | 0.7489828038608930 | 0.1476853713849968 | T T T |
| 0.2646632369645353 | 0.7492192803695356 | 0.2947415940560557 | T T T |
| 0.2844137961940914 | 0.7573276612042980 | 0.4391165133875977 | T T T |
| 0.9530599713325500 | 0.1194199994206429 | 0.0731099992990494 | F F F |
| 0.9526717711124896 | 0.1192046930376255 | 0.2201917984219866 | T T T |
| 0.9502808846122440 | 0.1179093334658446 | 0.3695519533267205 | T T T |
| 0.6913700103759766 | 0.0738499984145164 | 0.0731099992990494 | F F F |
| 0.6932033051923789 | 0.0714482598483752 | 0.2196036476191659 | T T T |
| 0.6869725720090947 | 0.0691715500758098 | 0.3657386383089031 | T T T |
| 0.4530600011348724 | 0.1194199994206429 | 0.0000000000000000 | F F F |
| 0.4533740141485382 | 0.1194133136021202 | 0.1466677371308462 | T T T |
| 0.4547881770141994 | 0.1194088912749995 | 0.2904467742771421 | T T T |

|                    |                    |                    |       |
|--------------------|--------------------|--------------------|-------|
| 0.4610269071986646 | 0.1191739843607384 | 0.4455166090931346 | T T T |
| 0.1913699954748154 | 0.0738499984145164 | 0.0000000000000000 | F F F |
| 0.1917127975244027 | 0.0747401939753528 | 0.1472574720468035 | T T T |
| 0.1895505246985751 | 0.0757968778769966 | 0.2941304096809809 | T T T |
| 0.2038139201517355 | 0.0779959570271943 | 0.4398088521283323 | T T T |
| 0.0469399988651276 | 0.6194199919700623 | 0.0731099992990494 | F F F |
| 0.0475051269220506 | 0.6195340237690247 | 0.2206004535556189 | T T T |
| 0.0483853801867878 | 0.6186262364850947 | 0.3721470298310956 | T T T |
| 0.3086299896240234 | 0.5738499760627747 | 0.0731099992990494 | F F F |
| 0.3083541193857124 | 0.5714205059667712 | 0.2212184847950157 | T T T |
| 0.3070198469883168 | 0.5680585981465262 | 0.3696332121327491 | T T T |
| 0.5469399690628052 | 0.6194199919700623 | 0.0000000000000000 | F F F |
| 0.5461732802056112 | 0.6195614905549078 | 0.1467303230900661 | T T T |
| 0.5447915395528986 | 0.6199571925069199 | 0.2931461746905325 | T T T |
| 0.5434316141839713 | 0.6178400159402517 | 0.4494747249645374 | T T T |
| 0.8086299896240234 | 0.5738499760627747 | 0.0000000000000000 | F F F |
| 0.8084874582647767 | 0.5751286307802395 | 0.1472912634066963 | T T T |
| 0.8103861614339153 | 0.5759461448864271 | 0.2945405641894395 | T T T |
| 0.7923450082837474 | 0.5740252552778535 | 0.4403672581378203 | T T T |
| 0.9530599713325500 | 0.3805799782276154 | 0.0731099992990494 | F F F |
| 0.9528482697094284 | 0.3807788236645973 | 0.2204886745337839 | T T T |
| 0.9504061734330254 | 0.3822741395444589 | 0.3689313210852269 | T T T |
| 0.6913700103759766 | 0.4261499941349030 | 0.0731099992990494 | F F F |
| 0.6922361085484672 | 0.4286561553261932 | 0.2196137870489768 | T T T |
| 0.6844904202345710 | 0.4309014846949288 | 0.3649646197142188 | T T T |
| 0.4530600011348724 | 0.3805799782276154 | 0.0000000000000000 | F F F |
| 0.4530643793933903 | 0.3804001558950387 | 0.1466682646905421 | T T T |
| 0.4529705982313790 | 0.3812290660550635 | 0.2915139463471297 | T T T |
| 0.1913699954748154 | 0.4261499941349030 | 0.0000000000000000 | F F F |
| 0.1914545765283594 | 0.4259549383158168 | 0.1474341439974197 | T T T |
| 0.1884453290963045 | 0.4235851147778973 | 0.2951321066510624 | T T T |
| 0.1968575577799170 | 0.4063967549007308 | 0.4433856493041749 | T T T |
| 0.0469399988651276 | 0.8805799484252930 | 0.0731099992990494 | F F F |
| 0.0476917754480433 | 0.8801090952281259 | 0.2204927504184993 | T T T |
| 0.0502747523653643 | 0.8811911976799085 | 0.3694926815624588 | T T T |
| 0.3086299896240234 | 0.9261499643325806 | 0.0731099992990494 | F F F |
| 0.3075453211298131 | 0.9265897468354700 | 0.2196348151820448 | T T T |
| 0.3143863733266777 | 0.9303049611640049 | 0.3645047543400537 | T T T |
| 0.5469399690628052 | 0.8805799484252930 | 0.0000000000000000 | F F F |
| 0.5466254659574306 | 0.8804295681678532 | 0.1462922003347153 | T T T |
| 0.5471261732385748 | 0.8808029386366423 | 0.2906832075992438 | T T T |
| 0.5443248875645139 | 0.8806108785138002 | 0.4379986340958010 | T T T |
| 0.8086299896240234 | 0.9261499643325806 | 0.0000000000000000 | F F F |
| 0.8085406077028303 | 0.9247202371954580 | 0.1472288822759850 | T T T |
| 0.8111815512808410 | 0.9244900517834695 | 0.2945990567800302 | T T T |
| 0.7976855737440580 | 0.9213431095047177 | 0.4421303625172146 | T T T |
| 0.4561709626561927 | 0.3853801363602044 | 0.4388247750965830 | T T T |
| 0.3158954877202306 | 0.5537211578549633 | 0.5170085511708559 | T T T |
| 0.8021000027656555 | 0.2500000000000000 | 0.0731099992990494 | F F F |
| 0.8027918597161351 | 0.2501802736879398 | 0.2200538768117874 | T T T |
| 0.8004314752809768 | 0.2499511201700187 | 0.3681029163132425 | T T T |
| 0.3021000027656555 | 0.2500000000000000 | 0.0000000000000000 | F F F |
| 0.3018726081309132 | 0.2501525261416950 | 0.1461949074842713 | T T T |
| 0.3048256762671205 | 0.2496592882413109 | 0.2901728650098043 | T T T |
| 0.3089377490552418 | 0.2374606540056986 | 0.4324371241973843 | T T T |
| 0.1978999972343445 | 0.7500000000000000 | 0.0731099992990494 | F F F |
| 0.1986863204580857 | 0.7481458628874083 | 0.2204339059546608 | T T T |
| 0.2037172906478364 | 0.7455232092711243 | 0.3692849498753577 | T T T |



|                    |                    |                    |       |
|--------------------|--------------------|--------------------|-------|
| 0.6978999972343445 | 0.7500000000000000 | 0.0000000000000000 | F F F |
| 0.6981938215154517 | 0.7498342839122092 | 0.1462004329784070 | T T T |
| 0.6967528385331876 | 0.7501683151885338 | 0.2909855790027097 | T T T |
| 0.6953587448114298 | 0.7541011136822828 | 0.4340300036574899 | T T T |
| 0.8665899634361267 | 0.5594399571418762 | 0.0731099992990494 | F F F |
| 0.8670085699566735 | 0.5594561453417871 | 0.2203085864781665 | T T T |
| 0.8659556446627374 | 0.5597216985672081 | 0.3694464919433261 | T T T |
| 0.3665899932384491 | 0.5594399571418762 | 0.0000000000000000 | F F F |
| 0.3658785170079155 | 0.5600464728350558 | 0.1474285839525362 | T T T |
| 0.3638034069514866 | 0.5600404796610142 | 0.2949151884221164 | T T T |
| 0.3643590263372041 | 0.5740591832044512 | 0.4465561105852480 | T T T |
| 0.1334099918603897 | 0.0594399981200695 | 0.0731099992990494 | F F F |
| 0.1326186246722698 | 0.0587220234150041 | 0.2200293060887473 | T T T |
| 0.1322944231727480 | 0.0585536538312097 | 0.3681965503893752 | T T T |
| 0.6334099769592285 | 0.0594399981200695 | 0.0000000000000000 | F F F |
| 0.6338155788578236 | 0.0598889936033669 | 0.1466744466518554 | T T T |
| 0.6352744837768186 | 0.0598864702277177 | 0.2910819831711322 | T T T |
| 0.6444122619569768 | 0.0584624950344498 | 0.4349702920082071 | T T T |
| 0.8665899634361267 | 0.9405599832534790 | 0.0731099992990494 | F F F |
| 0.8673144081421581 | 0.9397665089148750 | 0.2201281086546654 | T T T |
| 0.8674835485931692 | 0.9376740252319974 | 0.3691904310851905 | T T T |
| 0.3665899932384491 | 0.9405599832534790 | 0.0000000000000000 | F F F |
| 0.3668881730516950 | 0.9404551151835764 | 0.1466130530150137 | T T T |
| 0.3680253535624340 | 0.9412788030795658 | 0.2906931409461846 | T T T |
| 0.3618755988635410 | 0.9401229036226196 | 0.4332877363562246 | T T T |
| 0.1334099918603897 | 0.4405599832534790 | 0.0731099992990494 | F F F |
| 0.1338640456764510 | 0.4406001681672463 | 0.2204171457921202 | T T T |
| 0.1348321324756557 | 0.4419617325106443 | 0.3689165211309151 | T T T |
| 0.6334099769592285 | 0.4405599832534790 | 0.0000000000000000 | F F F |
| 0.6330228256364985 | 0.4403066716645010 | 0.1466437329273744 | T T T |
| 0.6318767233909426 | 0.4421592299558829 | 0.2908271928194586 | T T T |
| 0.6452580119618631 | 0.4385621563081582 | 0.4341037179259938 | T T T |
